# Supplementary material for: Opposite changes in APP processing and human Aβ levels in rats carrying either a protective or a pathogenic APP mutation
Source: eLife. 2020 Feb 5;9:e52612. doi: 10.7554/eLife.52612 (PMC7018507; doi:10.7554/eLife.52612)
Supplement: Figure 1—source data 1. [file elife-52612-fig1-data1.xlsx]

## Sheet: FIG2E
	h/h	p/p			Table Analyzed	App-FL-6E10
Fig. 2E	0.818847	1.07737
	1.18115	0.840539			Column B	p/p
	0.926187	1.37399			vs.	vs.
	1.07381	1.13754			Column A	h/h
					Unpaired t test
					P value	0.4586
					P value summary	ns
					Significantly different (P < 0.05)?	No
					One- or two-tailed P value?	Two-tailed
					t, df	t=0.7918, df=6
					How big is the difference?
					Mean of column A	1
					Mean of column B	1.107
					Difference between means (B - A) ± SEM	0.1074 ± 0.1356
					95% confidence interval	-0.2244 to 0.4391
					R squared (eta squared)	0.0946
					F test to compare variances
					F, DFn, Dfd	1.883, 3, 3
					P value	0.6163
					P value summary	ns
					Significantly different (P < 0.05)?	No
					Data analyzed
					Sample size, column A	4
					Sample size, column B	4

## Sheet: FIG2F
	h/h	p/p			Table Analyzed	App-FL-Y188
Fig. 2F	0.989786	0.964199
	1.01021	0.900823			Column B	p/p
	1.03101	1.11127			vs.	vs.
	0.968987	1.00884			Column A	h/h
					Unpaired t test
					P value	0.9385
					P value summary	ns
					Significantly different (P < 0.05)?	No
					One- or two-tailed P value?	Two-tailed
					t, df	t=0.08038, df=6
					How big is the difference?
					Mean of column A	1
					Mean of column B	0.9963
					Difference between means (B - A) ± SEM	-0.003716 ± 0.04624
					95% confidence interval	-0.1169 to 0.1094
					R squared (eta squared)	0.001076
					F test to compare variances
					F, DFn, Dfd	11.03, 3, 3
					P value	0.0793
					P value summary	ns
					Significantly different (P < 0.05)?	No
					Data analyzed
					Sample size, column A	4
					Sample size, column B	4

## Sheet: FIG2G
	h/h	p/p			Table Analyzed	bCTF-6E10
Fig. 2G	0.779014	0.765374
	1.22099	0.619524			Column B	p/p
	0.741422	0.646414			vs.	vs.
	1.25858	0.375021			Column A	h/h
					Unpaired t test
					P value	0.0484
					P value summary	*
					Significantly different (P < 0.05)?	Yes
					One- or two-tailed P value?	Two-tailed
					t, df	t=2.471, df=6
					How big is the difference?
					Mean of column A	1
					Mean of column B	0.6016
					Difference between means (B - A) ± SEM	-0.3984 ± 0.1612
					95% confidence interval	-0.7929 to -0.003937
					R squared (eta squared)	0.5044
					F test to compare variances
					F, DFn, Dfd	2.875, 3, 3
					P value	0.4089
					P value summary	ns
					Significantly different (P < 0.05)?	No
					Data analyzed
					Sample size, column A	4
					Sample size, column B	4

## Sheet: FIG2H
	h/h	p/p			Table Analyzed	bCTF-Y188
Fig. 2H	0.764933	1.20696
	1.23507	1.18341			Column B	p/p
	0.72611	1.43531			vs.	vs.
	1.27389	0.848074			Column A	h/h
					Unpaired t test
					P value	0.4109
					P value summary	ns
					Significantly different (P < 0.05)?	No
					One- or two-tailed P value?	Two-tailed
					t, df	t=0.8836, df=6
					How big is the difference?
					Mean of column A	1
					Mean of column B	1.168
					Difference between means (B - A) ± SEM	0.1684 ± 0.1906
					95% confidence interval	-0.2980 to 0.6349
					R squared (eta squared)	0.1151
					F test to compare variances
					F, DFn, Dfd	1.484, 3, 3
					P value	0.7535
					P value summary	ns
					Significantly different (P < 0.05)?	No
					Data analyzed
					Sample size, column A	4
					Sample size, column B	4

## Sheet: FIG2I
	h/h	p/p			Table Analyzed	aCTF-Y188
Fig. 2I	0.731039	1.16035
	1.26896	1.0615			Column B	p/p
	0.800513	1.68257			vs.	vs.
	1.19949	1.00729			Column A	h/h
					Unpaired t test
					P value	0.3121
					P value summary	ns
					Significantly different (P < 0.05)?	No
					One- or two-tailed P value?	Two-tailed
					t, df	t=1.104, df=6
					How big is the difference?
					Mean of column A	1
					Mean of column B	1.228
					Difference between means (B - A) ± SEM	0.2279 ± 0.2065
					95% confidence interval	-0.2775 to 0.7333
					R squared (eta squared)	0.1687
					F test to compare variances
					F, DFn, Dfd	1.283, 3, 3
					P value	0.8428
					P value summary	ns
					Significantly different (P < 0.05)?	No
					Data analyzed
					Sample size, column A	4
					Sample size, column B	4

## Sheet: FIG2J
	h/h	p/p			Table Analyzed	beta Y188/alpha
Fig. 2J	1.04636	1.04017
	0.97329	1.11485			Column B	p/p
	0.907056	0.85305			vs.	vs.
	1.06203	0.841935			Column A	h/h
					Unpaired t test
					P value	0.6681
					P value summary	ns
					Significantly different (P < 0.05)?	No
					One- or two-tailed P value?	Two-tailed
					t, df	t=0.4507, df=6
					How big is the difference?
					Mean of column A	0.9972
					Mean of column B	0.9625
					Difference between means (B - A) ± SEM	-0.03468 ± 0.07696
					95% confidence interval	-0.2230 to 0.1536
					R squared (eta squared)	0.03274
					F test to compare variances
					F, DFn, Dfd	3.640, 3, 3
					P value	0.3168
					P value summary	ns
					Significantly different (P < 0.05)?	No
					Data analyzed
					Sample size, column A	4
					Sample size, column B	4

## Sheet: Fig2K
	h/h	p/p			Table Analyzed	bctf6e10/actfy188
Fig. 2K	1.06563	0.659608
	0.962193	0.583632			Column B	p/p
	0.926183	0.384183			vs.	vs.
	1.04926	0.372307			Column A	h/h
					Unpaired t test
					P value	0.0007
					P value summary	***
					Significantly different (P < 0.05)?	Yes
					One- or two-tailed P value?	Two-tailed
					t, df	t=6.302, df=6
					How big is the difference?
					Mean of column A	1.001
					Mean of column B	0.4999
					Difference between means (B - A) ± SEM	-0.5009 ± 0.07948
					95% confidence interval	-0.6954 to -0.3064
					R squared (eta squared)	0.8688
					F test to compare variances
					F, DFn, Dfd	4.569, 3, 3
					P value	0.2439
					P value summary	ns
					Significantly different (P < 0.05)?	No
					Data analyzed
					Sample size, column A	4
					Sample size, column B	4

## Sheet: FIG2L
	h/h	p/p			Table Analyzed	sAPPb
Fig. 2L	0.789125	0.597944
	1.32434	0.572142			Column B	p/p
	1.0967	0.495984			vs.	vs.
	0.888305	0.477521			Column A	h/h
	0.90153	0.359782
					Unpaired t test
					P value	0.0014
					P value summary	**
					Significantly different (P < 0.05)?	Yes
					One- or two-tailed P value?	Two-tailed
					t, df	t=4.803, df=8
					How big is the difference?
					Mean of column A	1
					Mean of column B	0.5007
					Difference between means (B - A) ± SEM	-0.4993 ± 0.1040
					95% confidence interval	-0.7391 to -0.2596
					R squared (eta squared)	0.7425
					F test to compare variances
					F, DFn, Dfd	5.180, 4, 4
					P value	0.1401
					P value summary	ns
					Significantly different (P < 0.05)?	No
					Data analyzed
					Sample size, column A	5
					Sample size, column B	5

## Sheet: FIG2M
	h/h	p/p			Table Analyzed	sAPPa
Fig. 2M	0.830351	2.14633
	1.1887	3.4416			Column B	p/p
	1.05934	2.72389			vs.	vs.
	0.753345	3.37893			Column A	h/h
	1.16826	2.89138
					Unpaired t test
					P value	<0.0001
					P value summary	****
					Significantly different (P < 0.05)?	Yes
					One- or two-tailed P value?	Two-tailed
					t, df	t=7.583, df=8
					How big is the difference?
					Mean of column A	1
					Mean of column B	2.916
					Difference between means (B - A) ± SEM	1.916 ± 0.2527
					95% confidence interval	1.334 to 2.499
					R squared (eta squared)	0.8779
					F test to compare variances
					F, DFn, Dfd	7.134, 4, 4
					P value	0.0833
					P value summary	ns
					Significantly different (P < 0.05)?	No
					Data analyzed
					Sample size, column A	5
					Sample size, column B	5

## Sheet: FIG2N
	h/h	p/p			Table Analyzed	Abeta40
Fig. 2N	12.6023	1.525
	7.533	0.352			Column B	p/p
	10.5373	0.774333			vs.	vs.
	12.5083	2.11233			Column A	h/h
					Unpaired t test
					P value	0.0003
					P value summary	***
					Significantly different (P < 0.05)?	Yes
					One- or two-tailed P value?	Two-tailed
					t, df	t=7.684, df=6
					How big is the difference?
					Mean of column A	10.8
					Mean of column B	1.191
					Difference between means (B - A) ± SEM	-9.604 ± 1.250
					95% confidence interval	-12.66 to -6.546
					R squared (eta squared)	0.9078
					F test to compare variances
					F, DFn, Dfd	9.200, 3, 3
					P value	0.1011
					P value summary	ns
					Significantly different (P < 0.05)?	No
					Data analyzed
					Sample size, column A	4
					Sample size, column B	4
