# Supplementary material for: Opposite changes in APP processing and human Aβ levels in rats carrying either a protective or a pathogenic APP mutation
Source: eLife. 2020 Feb 5;9:e52612. doi: 10.7554/eLife.52612 (PMC7018507; doi:10.7554/eLife.52612)
Supplement: Figure 3—source data 1. [file elife-52612-fig3-data1.xlsx]

## Sheet: FIG3B
	h/h M	p/h M	p/p M	h/h F	p/h F	p/p F		Ordinary one-way ANOVA
Fig. 3B	0	0	0	2000.17	0	0		Table Analyzed	Ab38+p22
Ab38+p22	0	0	0	2672.89	0	0		Data sets analyzed	A-F
	0	0	0	0	0	0
	0	0	0	0	0	0		ANOVA summary
	0	0	0	0	0	0		F	2.578
								P value	0.0529
								P value summary	ns
								Significant diff. among means (P < 0.05)?	No
								R square	0.3494
								Brown-Forsythe test
								F (DFn, DFd)	2.578 (5, 24)
								P value	0.0529
								P value summary	ns
								Are SDs significantly different (P < 0.05)?	No
								Bartlett's test
								Bartlett's statistic (corrected)
								P value
								P value summary
								Are SDs significantly different (P < 0.05)?
								ANOVA table	SS	DF	MS	F (DFn, DFd)	P value
								Treatment (between columns)	3639591	5	727918	F (5, 24) = 2.578	P=0.0529
								Residual (within columns)	6777539	24	282397
								Total	10417129	29
								Data summary
								Number of treatments (columns)	6
								Number of values (total)	30
	h/h M	p/h M	p/p M	h/h F	p/h F	p/p F		Ordinary one-way ANOVA
Fig. 3B	0	0	0	1316.81	0	0		Table Analyzed	Ab38
Ab38	33.3989	0	0	973.129	0	0		Data sets analyzed	A-F
	0	0	0	0	0	0
	0	0	0	0	0	0		ANOVA summary
	0	0	0	0	0	0		F	2.554
								P value	0.0546
								P value summary	ns
								Significant diff. among means (P < 0.05)?	No
								R square	0.3473
								Brown-Forsythe test
								F (DFn, DFd)	2.554 (5, 24)
								P value	0.0546
								P value summary	ns
								Are SDs significantly different (P < 0.05)?	No
								Bartlett's test
								Bartlett's statistic (corrected)
								P value
								P value summary
								Are SDs significantly different (P < 0.05)?
								ANOVA table	SS	DF	MS	F (DFn, DFd)	P value
								Treatment (between columns)	869054	5	173811	F (5, 24) = 2.554	P=0.0546
								Residual (within columns)	1633090	24	68045
								Total	2502145	29
								Data summary
								Number of treatments (columns)	6
								Number of values (total)	30

## Sheet: FIG3C
	h/h M	p/h M	p/p M	h/h F	p/h F	p/p F		Ordinary one-way ANOVA							Tukey's multiple comparisons test
Fig. 3C	1809.58	1103.07	674.35	1286.23	1247.63	493.382		P value	<0.0001						Number of families	1
Ab40+p24	1395.52	1320.24	603.084	1145.68	1126.87	506.394		P value summary	****						Number of comparisons per family	15
	1637.91	1531.14	598.212	1376.29	1193.19	674.922		Significant diff. among means (P < 0.05)?	Yes						Alpha	0.05
	1541.64	1383.15	553.131	1626.21	896.937	735.561		R square	0.8772
	1374.87	1265.18	581.195	1189.83	874.919	675.874									Tukey's multiple comparisons test	Mean Diff.	95.00% CI of diff.	Significant?	Summary	Adjusted P Value
								Brown-Forsythe test							h/h M vs. p/h M	231.3	-64.15 to 526.8	No	ns	0.1888	A-B
								F (DFn, DFd)	0.9627 (5, 24)						h/h M vs. p/p M	949.9	654.4 to 1245	Yes	****	<0.0001	A-C
								P value	0.46						h/h M vs. h/h F	227.1	-68.44 to 522.6	No	ns	0.2043	A-D
								P value summary	ns						h/h M vs. p/h F	484	188.5 to 779.5	Yes	***	0.0005	A-E
								Are SDs significantly different (P < 0.05)?	No						h/h M vs. p/p F	934.7	639.2 to 1230	Yes	****	<0.0001	A-F
															p/h M vs. p/p M	718.6	423.1 to 1014	Yes	****	<0.0001	B-C
								Bartlett's test							p/h M vs. h/h F	-4.292	-299.8 to 291.2	No	ns	>0.9999	B-D
								Bartlett's statistic (corrected)	6.978						p/h M vs. p/h F	252.6	-42.85 to 548.1	No	ns	0.125	B-E
								P value	0.2223						p/h M vs. p/p F	703.3	407.8 to 998.8	Yes	****	<0.0001	B-F
								P value summary	ns						p/p M vs. h/h F	-722.9	-1018 to -427.4	Yes	****	<0.0001	C-D
								Are SDs significantly different (P < 0.05)?	No						p/p M vs. p/h F	-465.9	-761.4 to -170.4	Yes	***	0.0007	C-E
															p/p M vs. p/p F	-15.23	-310.7 to 280.3	No	ns	>0.9999	C-F
								ANOVA table	SS	DF	MS	F (DFn, DFd)	P value		h/h F vs. p/h F	256.9	-38.56 to 552.4	No	ns	0.1146	D-E
								Treatment (between columns)	3916509	5	783302	F (5, 24) = 34.30	P<0.0001		h/h F vs. p/p F	707.6	412.1 to 1003	Yes	****	<0.0001	D-F
								Residual (within columns)	548023	24	22834				p/h F vs. p/p F	450.7	155.2 to 746.2	Yes	**	0.0011	E-F
								Total	4464532	29
															Test details	Mean 1	Mean 2	Mean Diff.	SE of diff.	n1	n2	q	DF
								Model comparison	SS	DF	Probability it is correct				h/h M vs. p/h M	1552	1321	231.3	95.57	5	5	3.423	24
								Null H. All population means identical	4464532	29	3.279e-009%				h/h M vs. p/p M	1552	602	949.9	95.57	5	5	14.06	24
								Alternative H: Distinct population means	548023	24	100%				h/h M vs. h/h F	1552	1325	227.1	95.57	5	5	3.36	24
								Ratio of probabilities			0				h/h M vs. p/h F	1552	1068	484	95.57	5	5	7.162	24
								Difference in AICc			48.28				h/h M vs. p/p F	1552	617.2	934.7	95.57	5	5	13.83	24
															p/h M vs. p/p M	1321	602	718.6	95.57	5	5	10.63	24
								Data summary							p/h M vs. h/h F	1321	1325	-4.292	95.57	5	5	0.06351	24
								Number of treatments (columns)	6						p/h M vs. p/h F	1321	1068	252.6	95.57	5	5	3.739	24
								Number of values (total)	30						p/h M vs. p/p F	1321	617.2	703.3	95.57	5	5	10.41	24
															p/p M vs. h/h F	602	1325	-722.9	95.57	5	5	10.7	24
															p/p M vs. p/h F	602	1068	-465.9	95.57	5	5	6.894	24
															p/p M vs. p/p F	602	617.2	-15.23	95.57	5	5	0.2254	24
															h/h F vs. p/h F	1325	1068	256.9	95.57	5	5	3.802	24
															h/h F vs. p/p F	1325	617.2	707.6	95.57	5	5	10.47	24
															p/h F vs. p/p F	1068	617.2	450.7	95.57	5	5	6.669	24
	h/h M	p/h M	p/p M	h/h F	p/h F	p/p F		Ordinary one-way ANOVA							Tukey's multiple comparisons test
Fig. 3C	1741.86	1042.27	513.305	1186.11	1117.48	400.542		Table Analyzed	Ab40						Number of families	1
Ab40	1384.86	1228.93	502.641	1234.69	1012.6	435.672		Data sets analyzed	A-F						Number of comparisons per family	15
	1654.06	1290.14	481.493	1393.72	1074.03	577.448									Alpha	0.05
	1379.78	1209.17	442.989	1693.9	852.616	577.448		ANOVA summary
	1300.35	1123.91	475.686	1112.1	862.607	558.49		F	43.32						Tukey's multiple comparisons test	Mean Diff.	95.00% CI of diff.	Significant?	Summary	Adjusted P Value
								P value	<0.0001						h/h M vs. p/h M	313.3	33.53 to 593.1	Yes	*	0.0219	A-B
								P value summary	****						h/h M vs. p/p M	1009	729.2 to 1289	Yes	****	<0.0001	A-C
								Significant diff. among means (P < 0.05)?	Yes						h/h M vs. h/h F	168.1	-111.7 to 447.8	No	ns	0.4504	A-D
								R square	0.9003						h/h M vs. p/h F	508.3	228.6 to 788.1	Yes	***	0.0001	A-E
															h/h M vs. p/p F	982.3	702.5 to 1262	Yes	****	<0.0001	A-F
								Brown-Forsythe test							p/h M vs. p/p M	695.7	415.9 to 975.4	Yes	****	<0.0001	B-C
								F (DFn, DFd)	1.117 (5, 24)						p/h M vs. h/h F	-145.2	-425.0 to 134.5	No	ns	0.6033	B-D
								P value	0.3777						p/h M vs. p/h F	195	-84.74 to 474.8	No	ns	0.2943	B-E
								P value summary	ns						p/h M vs. p/p F	669	389.2 to 948.7	Yes	****	<0.0001	B-F
								Are SDs significantly different (P < 0.05)?	No						p/p M vs. h/h F	-840.9	-1121 to -561.1	Yes	****	<0.0001	C-D
															p/p M vs. p/h F	-500.6	-780.4 to -220.9	Yes	***	0.0001	C-E
								Bartlett's test							p/p M vs. p/p F	-26.7	-306.5 to 253.1	No	ns	0.9997	C-F
								Bartlett's statistic (corrected)	14.26						h/h F vs. p/h F	340.2	60.47 to 620.0	Yes	*	0.011	D-E
								P value	0.014						h/h F vs. p/p F	814.2	534.4 to 1094	Yes	****	<0.0001	D-F
								P value summary	*						p/h F vs. p/p F	473.9	194.2 to 753.7	Yes	***	0.0003	E-F
								Are SDs significantly different (P < 0.05)?	Yes
															Test details	Mean 1	Mean 2	Mean Diff.	SE of diff.	n1	n2	q	DF
								ANOVA table	SS	DF	MS	F (DFn, DFd)	P value		h/h M vs. p/h M	1492	1179	313.3	90.48	5	5	4.897	24
								Treatment (between columns)	4433270	5	886654	F (5, 24) = 43.32	P<0.0001		h/h M vs. p/p M	1492	483.2	1009	90.48	5	5	15.77	24
								Residual (within columns)	491214	24	20467				h/h M vs. h/h F	1492	1324	168.1	90.48	5	5	2.627	24
								Total	4924484	29					h/h M vs. p/h F	1492	983.9	508.3	90.48	5	5	7.945	24
															h/h M vs. p/p F	1492	509.9	982.3	90.48	5	5	15.35	24
								Data summary							p/h M vs. p/p M	1179	483.2	695.7	90.48	5	5	10.87	24
								Number of treatments (columns)	6						p/h M vs. h/h F	1179	1324	-145.2	90.48	5	5	2.27	24
								Number of values (total)	30						p/h M vs. p/h F	1179	983.9	195	90.48	5	5	3.048	24
															p/h M vs. p/p F	1179	509.9	669	90.48	5	5	10.46	24
															p/p M vs. h/h F	483.2	1324	-840.9	90.48	5	5	13.14	24
															p/p M vs. p/h F	483.2	983.9	-500.6	90.48	5	5	7.825	24
															p/p M vs. p/p F	483.2	509.9	-26.7	90.48	5	5	0.4173	24
															h/h F vs. p/h F	1324	983.9	340.2	90.48	5	5	5.318	24
															h/h F vs. p/p F	1324	509.9	814.2	90.48	5	5	12.73	24
															p/h F vs. p/p F	983.9	509.9	473.9	90.48	5	5	7.408	24

## Sheet: FIG3D
	h/h M	p/h M	p/p M	h/h F	p/h F	p/p F		Ordinary one-way ANOVA							Tukey's multiple comparisons test
Fig. 3D	85.0624	79.7486	34.1842	171.564	77.3309	57.7983		Table Analyzed	Ab42+p26						Number of families	1
Ab42+p26	81.5386	83.8958	39.4361	156.805	63.2894	49.7986		Data sets analyzed	A-F						Number of comparisons per family	15
	75.4932	74.2558	61.2585	65.9488	71.7502	37.7255									Alpha	0.05
	88.5163	64.6258	56.3857	75.4932	58.4983	43.5633		ANOVA summary
	85.0624	62.616	62.616	71.7502	60.5743	44.3657		F	5.062						Tukey's multiple comparisons test	Mean Diff.	95.00% CI of diff.	Significant?	Summary	Adjusted P Value
								P value	0.0026						h/h M vs. p/h M	10.11	-33.93 to 54.14	No	ns	0.9789	A-B
								P value summary	**						h/h M vs. p/p M	32.36	-11.68 to 76.39	No	ns	0.2438	A-C
								Significant diff. among means (P < 0.05)?	Yes						h/h M vs. h/h F	-25.18	-69.21 to 18.86	No	ns	0.5036	A-D
								R square	0.5133						h/h M vs. p/h F	16.85	-27.19 to 60.88	No	ns	0.8406	A-E
															h/h M vs. p/p F	36.48	-7.551 to 80.52	No	ns	0.146	A-F
								Brown-Forsythe test							p/h M vs. p/p M	22.25	-21.78 to 66.29	No	ns	0.6295	B-C
								F (DFn, DFd)	2.210 (5, 24)						p/h M vs. h/h F	-35.28	-79.32 to 8.752	No	ns	0.1706	B-D
								P value	0.0865						p/h M vs. p/h F	6.74	-37.30 to 50.78	No	ns	0.9967	B-E
								P value summary	ns						p/h M vs. p/p F	26.38	-17.66 to 70.41	No	ns	0.4536	B-F
								Are SDs significantly different (P < 0.05)?	No						p/p M vs. h/h F	-57.54	-101.6 to -13.50	Yes	**	0.0056	C-D
															p/p M vs. p/h F	-15.51	-59.55 to 28.52	No	ns	0.8809	C-E
								Bartlett's test							p/p M vs. p/p F	4.126	-39.91 to 48.16	No	ns	0.9997	C-F
								Bartlett's statistic (corrected)	31.01						h/h F vs. p/h F	42.02	-2.012 to 86.06	No	ns	0.0675	D-E
								P value	<0.0001						h/h F vs. p/p F	61.66	17.63 to 105.7	Yes	**	0.0028	D-F
								P value summary	****						p/h F vs. p/p F	19.64	-24.40 to 63.67	No	ns	0.7387	E-F
								Are SDs significantly different (P < 0.05)?	Yes
															Test details	Mean 1	Mean 2	Mean Diff.	SE of diff.	n1	n2	q	DF
								ANOVA table	SS	DF	MS	F (DFn, DFd)	P value		h/h M vs. p/h M	83.13	73.03	10.11	14.24	5	5	1.004	24
								Treatment (between columns)	12834	5	2567	F (5, 24) = 5.062	P=0.0026		h/h M vs. p/p M	83.13	50.78	32.36	14.24	5	5	3.213	24
								Residual (within columns)	12170	24	507.1				h/h M vs. h/h F	83.13	108.3	-25.18	14.24	5	5	2.5	24
								Total	25005	29					h/h M vs. p/h F	83.13	66.29	16.85	14.24	5	5	1.673	24
															h/h M vs. p/p F	83.13	46.65	36.48	14.24	5	5	3.623	24
								Model comparison	SS	DF	Probability it is correct				p/h M vs. p/p M	73.03	50.78	22.25	14.24	5	5	2.21	24
								Null H. All population means identical	25005	29	2.995%				p/h M vs. h/h F	73.03	108.3	-35.28	14.24	5	5	3.504	24
								Alternative H: Distinct population means	12170	24	97.01%				p/h M vs. p/h F	73.03	66.29	6.74	14.24	5	5	0.6693	24
								Ratio of probabilities			32.39				p/h M vs. p/p F	73.03	46.65	26.38	14.24	5	5	2.619	24
								Difference in AICc			6.956				p/p M vs. h/h F	50.78	108.3	-57.54	14.24	5	5	5.713	24
															p/p M vs. p/h F	50.78	66.29	-15.51	14.24	5	5	1.54	24
								Data summary							p/p M vs. p/p F	50.78	46.65	4.126	14.24	5	5	0.4097	24
								Number of treatments (columns)	6						h/h F vs. p/h F	108.3	66.29	42.02	14.24	5	5	4.173	24
								Number of values (total)	30						h/h F vs. p/p F	108.3	46.65	61.66	14.24	5	5	6.123	24
															p/h F vs. p/p F	66.29	46.65	19.64	14.24	5	5	1.95	24
	h/h M	p/h M	p/p M	h/h F	p/h F	p/p F		Ordinary one-way ANOVA							Tukey's multiple comparisons test
Fig. 3D	54.1343	31.0657	7.89547	77.8542	22.4102	0		Table Analyzed	Ab42						Number of families	1
Ab42	54.6134	39.997	0.334738	89.3563	19.026	0		Data sets analyzed	A-F						Number of comparisons per family	15
	52.6879	37.2901	8.83185	31.6491	15.4093	19.026									Alpha	0.05
	29.2913	30.4784	0	44.1975	18.3236	11.4549		ANOVA summary
	32.2287	33.3768	0	36.7403	21.08	10.6069		F	13.76						Tukey's multiple comparisons test	Mean Diff.	95.00% CI of diff.	Significant?	Summary	Adjusted P Value
								P value	<0.0001						h/h M vs. p/h M	10.15	-14.40 to 34.70	No	ns	0.7937	A-B
								P value summary	****						h/h M vs. p/p M	41.18	16.62 to 65.73	Yes	***	0.0003	A-C
								Significant diff. among means (P < 0.05)?	Yes						h/h M vs. h/h F	-11.37	-35.92 to 13.19	No	ns	0.7083	A-D
								R square	0.7414						h/h M vs. p/h F	25.34	0.7871 to 49.90	Yes	*	0.0403	A-E
															h/h M vs. p/p F	36.37	11.82 to 60.93	Yes	**	0.0015	A-F
								Brown-Forsythe test							p/h M vs. p/p M	31.03	6.475 to 55.58	Yes	**	0.0077	B-C
								F (DFn, DFd)	2.459 (5, 24)						p/h M vs. h/h F	-21.52	-46.07 to 3.036	No	ns	0.11	B-D
								P value	0.062						p/h M vs. p/h F	15.19	-9.362 to 39.75	No	ns	0.4188	B-E
								P value summary	ns						p/h M vs. p/p F	26.22	1.670 to 50.78	Yes	*	0.0315	B-F
								Are SDs significantly different (P < 0.05)?	No						p/p M vs. h/h F	-52.55	-77.10 to -27.99	Yes	****	<0.0001	C-D
															p/p M vs. p/h F	-15.84	-40.39 to 8.717	No	ns	0.3743	C-E
								Bartlett's test							p/p M vs. p/p F	-4.805	-29.36 to 19.75	No	ns	0.9896	C-F
								Bartlett's statistic (corrected)	24.57						h/h F vs. p/h F	36.71	12.16 to 61.26	Yes	**	0.0014	D-E
								P value	0.0002						h/h F vs. p/p F	47.74	23.19 to 72.30	Yes	****	<0.0001	D-F
								P value summary	***						p/h F vs. p/p F	11.03	-13.52 to 35.59	No	ns	0.7328	E-F
								Are SDs significantly different (P < 0.05)?	Yes
															Test details	Mean 1	Mean 2	Mean Diff.	SE of diff.	n1	n2	q	DF
								ANOVA table	SS	DF	MS	F (DFn, DFd)	P value		h/h M vs. p/h M	44.59	34.44	10.15	7.941	5	5	1.807	24
								Treatment (between columns)	10851	5	2170	F (5, 24) = 13.76	P<0.0001		h/h M vs. p/p M	44.59	3.412	41.18	7.941	5	5	7.333	24
								Residual (within columns)	3784	24	157.7				h/h M vs. h/h F	44.59	55.96	-11.37	7.941	5	5	2.024	24
								Total	14635	29					h/h M vs. p/h F	44.59	19.25	25.34	7.941	5	5	4.513	24
															h/h M vs. p/p F	44.59	8.218	36.37	7.941	5	5	6.477	24
								Data summary							p/h M vs. p/p M	34.44	3.412	31.03	7.941	5	5	5.526	24
								Number of treatments (columns)	6						p/h M vs. h/h F	34.44	55.96	-21.52	7.941	5	5	3.832	24
								Number of values (total)	30						p/h M vs. p/h F	34.44	19.25	15.19	7.941	5	5	2.705	24
															p/h M vs. p/p F	34.44	8.218	26.22	7.941	5	5	4.67	24
															p/p M vs. h/h F	3.412	55.96	-52.55	7.941	5	5	9.358	24
															p/p M vs. p/h F	3.412	19.25	-15.84	7.941	5	5	2.82	24
															p/p M vs. p/p F	3.412	8.218	-4.805	7.941	5	5	0.8557	24
															h/h F vs. p/h F	55.96	19.25	36.71	7.941	5	5	6.537	24
															h/h F vs. p/p F	55.96	8.218	47.74	7.941	5	5	8.502	24
															p/h F vs. p/p F	19.25	8.218	11.03	7.941	5	5	1.965	24

## Sheet: FIG3E
	h/h M	p/h M	p/p M	h/h F	p/h F	p/p F		Ordinary one-way ANOVA
Fig. 3E	0.0470067	0.0722967	0.050692	0.133386	0.061982	0.117147		Table Analyzed	Ab42/Ab40-4G8
Ab42+p26/Ab40+p24	0.0584288	0.0635459	0.0653907	0.136866	0.056164	0.0983395		Data sets analyzed	A-F
	0.0460912	0.0484972	0.102403	0.0479177	0.0601331	0.0558961
	0.0574171	0.0467236	0.101939	0.0464229	0.0652201	0.0592246		ANOVA summary
	0.0618695	0.0494917	0.107737	0.0603029	0.0692342	0.065642		F	1.694
								P value	0.1745
								P value summary	ns
								Significant diff. among means (P < 0.05)?	No
								R square	0.2608
								Brown-Forsythe test
								F (DFn, DFd)	1.722 (5, 24)
								P value	0.168
								P value summary	ns
								Are SDs significantly different (P < 0.05)?	No
								Bartlett's test
								Bartlett's statistic (corrected)	21.32
								P value	0.0007
								P value summary	***
								Are SDs significantly different (P < 0.05)?	Yes
								ANOVA table	SS	DF	MS	F (DFn, DFd)	P value
								Treatment (between columns)	0.005262	5	0.001052	F (5, 24) = 1.694	P=0.1745
								Residual (within columns)	0.01491	24	0.0006214
								Total	0.02018	29
								Model comparison	SS	DF	Probability it is correct
								Null H. All population means identical	0.02018	29	94.21%
								Alternative H: Distinct population means	0.01491	24	5.785%
								Ratio of probabilities			16.29
								Difference in AICc			-5.581
								Data summary
								Number of treatments (columns)	6
								Number of values (total)	30
	h/h M	p/h M	p/p M	h/h F	p/h F	p/p F		Ordinary one-way ANOVA							Tukey's multiple comparisons test
Fig. 3E	0.0310784	0.0298058	0.0153817	0.0656385	0.0200542	0		Table Analyzed	Ab42/Ab40-6E10						Number of families	1
Ab42/Ab40	0.039436	0.0325462	0.000665959	0.0723715	0.0187892	0		Data sets analyzed	A-F						Number of comparisons per family	15
	0.0318538	0.0289039	0.0183426	0.0227084	0.0143472	0.0329483									Alpha	0.05
	0.0212289	0.0252061	0	0.0260921	0.0214911	0.0198371		ANOVA summary
	0.0247847	0.0296969	0	0.0330369	0.0244376	0.0189921		F	5.756						Tukey's multiple comparisons test	Mean Diff.	95.00% CI of diff.	Significant?	Summary	Adjusted P Value
								P value	0.0013						h/h M vs. p/h M	0.0004446	-0.02349 to 0.02437	No	ns	>0.9999	A-B
								P value summary	**						h/h M vs. p/p M	0.0228	-0.001132 to 0.04673	No	ns	0.0682	A-C
								Significant diff. among means (P < 0.05)?	Yes						h/h M vs. h/h F	-0.01429	-0.03822 to 0.009637	No	ns	0.4567	A-D
								R square	0.5453						h/h M vs. p/h F	0.009853	-0.01408 to 0.03378	No	ns	0.7963	A-E
															h/h M vs. p/p F	0.01532	-0.008609 to 0.03925	No	ns	0.3822	A-F
								Brown-Forsythe test							p/h M vs. p/p M	0.02235	-0.001576 to 0.04628	No	ns	0.0768	B-C
								F (DFn, DFd)	2.230 (5, 24)						p/h M vs. h/h F	-0.01474	-0.03867 to 0.009192	No	ns	0.4237	B-D
								P value	0.0842						p/h M vs. p/h F	0.009408	-0.01452 to 0.03334	No	ns	0.8251	B-E
								P value summary	ns						p/h M vs. p/p F	0.01488	-0.009054 to 0.03881	No	ns	0.4137	B-F
								Are SDs significantly different (P < 0.05)?	No						p/p M vs. h/h F	-0.03709	-0.06102 to -0.01316	Yes	***	0.0009	C-D
															p/p M vs. p/h F	-0.01295	-0.03688 to 0.01098	No	ns	0.5616	C-E
								Bartlett's test							p/p M vs. p/p F	-0.007477	-0.03141 to 0.01645	No	ns	0.9242	C-F
								Bartlett's statistic (corrected)	20.24						h/h F vs. p/h F	0.02415	0.0002156 to 0.04808	Yes	*	0.0471	D-E
								P value	0.0011						h/h F vs. p/p F	0.02961	0.005684 to 0.05354	Yes	**	0.0094	D-F
								P value summary	**						p/h F vs. p/p F	0.005468	-0.01846 to 0.02940	No	ns	0.9793	E-F
								Are SDs significantly different (P < 0.05)?	Yes
															Test details	Mean 1	Mean 2	Mean Diff.	SE of diff.	n1	n2	q	DF
								ANOVA table	SS	DF	MS	F (DFn, DFd)	P value		h/h M vs. p/h M	0.02968	0.02923	0.0004446	0.00774	5	5	0.08124	24
								Treatment (between columns)	0.00431	5	0.000862	F (5, 24) = 5.756	P=0.0013		h/h M vs. p/p M	0.02968	0.006878	0.0228	0.00774	5	5	4.166	24
								Residual (within columns)	0.003594	24	0.0001497				h/h M vs. h/h F	0.02968	0.04397	-0.01429	0.00774	5	5	2.612	24
								Total	0.007904	29					h/h M vs. p/h F	0.02968	0.01982	0.009853	0.00774	5	5	1.8	24
															h/h M vs. p/p F	0.02968	0.01436	0.01532	0.00774	5	5	2.8	24
								Data summary							p/h M vs. p/p M	0.02923	0.006878	0.02235	0.00774	5	5	4.085	24
								Number of treatments (columns)	6						p/h M vs. h/h F	0.02923	0.04397	-0.01474	0.00774	5	5	2.693	24
								Number of values (total)	30						p/h M vs. p/h F	0.02923	0.01982	0.009408	0.00774	5	5	1.719	24
															p/h M vs. p/p F	0.02923	0.01436	0.01488	0.00774	5	5	2.718	24
															p/p M vs. h/h F	0.006878	0.04397	-0.03709	0.00774	5	5	6.778	24
															p/p M vs. p/h F	0.006878	0.01982	-0.01295	0.00774	5	5	2.366	24
															p/p M vs. p/p F	0.006878	0.01436	-0.007477	0.00774	5	5	1.366	24
															h/h F vs. p/h F	0.04397	0.01982	0.02415	0.00774	5	5	4.412	24
															h/h F vs. p/p F	0.04397	0.01436	0.02961	0.00774	5	5	5.411	24
															p/h F vs. p/p F	0.01982	0.01436	0.005468	0.00774	5	5	0.9992	24

## Sheet: FIG3F
	h/h M	p/h M	p/p M	h/h F	p/h F	p/p F		Ordinary one-way ANOVA
Fig. 3F	4.31129	3.69822	4.37813	4.47592	5.47971	3.69376		Table Analyzed	**sAPPa (by sex)
sAPPa	4.55701	5.29416	5.7351	2.35745	4.91324	2.66963		Data sets analyzed	A-F
	3.55968	6.20319	5.4462	2.9922	6.97475	3.04843
	5.68599	4.74079	5.30174	3.13291	3.46982	5.25879		ANOVA summary
	2.94782	4.56993	4.60951	2.3044	2.88661	5.61179		F	2.263
								P value	0.0806
								P value summary	ns
								Significant diff. among means (P < 0.05)?	No
								R square	0.3204
								Brown-Forsythe test
								F (DFn, DFd)	0.9683 (5, 24)
								P value	0.4568
								P value summary	ns
								Are SDs significantly different (P < 0.05)?	No
								Bartlett's test
								Bartlett's statistic (corrected)	4.362
								P value	0.4986
								P value summary	ns
								Are SDs significantly different (P < 0.05)?	No
								ANOVA table	SS	DF	MS	F (DFn, DFd)	P value
								Treatment (between columns)	14.01	5	2.802	F (5, 24) = 2.263	P=0.0806
								Residual (within columns)	29.72	24	1.238
								Total	43.73	29
								Data summary
								Number of treatments (columns)	6
								Number of values (total)	30
	h/h M	p/h M	p/p M	h/h F	p/h F	p/p F		Ordinary one-way ANOVA							Tukey's multiple comparisons test
Fig. 3F	0.230907	0.118086	0.121714	0.230571	0.178533	0.115665		Table Analyzed	**sAPPb-wt (by sex)						Number of families	1
sAPPb	0.205633	0.221317	0.152802	0.151092	0.142014	0.121368		Data sets analyzed	A-F						Number of comparisons per family	15
	0.158781	0.187527	0.146128	0.229226	0.245851	0.094122									Alpha	0.05
	0.240986	0.183287	0.11774	0.227039	0.155878	0.115492		ANOVA summary
	0.155707	0.176154	0.111164	0.170542	0.1427	0.16952		F	4.552						Tukey's multiple comparisons test	Mean Diff.	95.00% CI of diff.	Significant?	Summary	Adjusted P Value
								P value	0.0046						h/h M vs. p/h M	0.02113	-0.04759 to 0.08985	No	ns	0.9288	A-B
								P value summary	**						h/h M vs. p/p M	0.06849	-0.0002277 to 0.1372	No	ns	0.0511	A-C
								Significant diff. among means (P < 0.05)?	Yes						h/h M vs. h/h F	-0.003291	-0.07201 to 0.06543	No	ns	>0.9999	A-D
								R square	0.4868						h/h M vs. p/h F	0.02541	-0.04331 to 0.09413	No	ns	0.8584	A-E
															h/h M vs. p/p F	0.07517	0.006448 to 0.1439	Yes	*	0.0263	A-F
								Brown-Forsythe test							p/h M vs. p/p M	0.04736	-0.02136 to 0.1161	No	ns	0.3056	B-C
								F (DFn, DFd)	0.3285 (5, 24)						p/h M vs. h/h F	-0.02442	-0.09314 to 0.04430	No	ns	0.8771	B-D
								P value	0.8908						p/h M vs. p/h F	0.004279	-0.06444 to 0.07300	No	ns	>0.9999	B-E
								P value summary	ns						p/h M vs. p/p F	0.05404	-0.01468 to 0.1228	No	ns	0.1853	B-F
								Are SDs significantly different (P < 0.05)?	No						p/p M vs. h/h F	-0.07178	-0.1405 to -0.003063	Yes	*	0.037	C-D
															p/p M vs. p/h F	-0.04309	-0.1118 to 0.02564	No	ns	0.4045	C-E
								Bartlett's test							p/p M vs. p/p F	0.006676	-0.06204 to 0.07540	No	ns	0.9996	C-F
								Bartlett's statistic (corrected)	2.972						h/h F vs. p/h F	0.0287	-0.04002 to 0.09742	No	ns	0.7868	D-E
								P value	0.7043						h/h F vs. p/p F	0.07846	0.009740 to 0.1472	Yes	*	0.0188	D-F
								P value summary	ns						p/h F vs. p/p F	0.04976	-0.01896 to 0.1185	No	ns	0.2575	E-F
								Are SDs significantly different (P < 0.05)?	No
															Test details	Mean 1	Mean 2	Mean Diff.	SE of diff.	n1	n2	q	DF
								ANOVA table	SS	DF	MS	F (DFn, DFd)	P value		h/h M vs. p/h M	0.1984	0.1773	0.02113	0.02223	5	5	1.344	24
								Treatment (between columns)	0.02811	5	0.005622	F (5, 24) = 4.552	P=0.0046		h/h M vs. p/p M	0.1984	0.1299	0.06849	0.02223	5	5	4.358	24
								Residual (within columns)	0.02964	24	0.001235				h/h M vs. h/h F	0.1984	0.2017	-0.003291	0.02223	5	5	0.2094	24
								Total	0.05775	29					h/h M vs. p/h F	0.1984	0.173	0.02541	0.02223	5	5	1.617	24
															h/h M vs. p/p F	0.1984	0.1232	0.07517	0.02223	5	5	4.783	24
								Data summary							p/h M vs. p/p M	0.1773	0.1299	0.04736	0.02223	5	5	3.014	24
								Number of treatments (columns)	6						p/h M vs. h/h F	0.1773	0.2017	-0.02442	0.02223	5	5	1.554	24
								Number of values (total)	30						p/h M vs. p/h F	0.1773	0.173	0.004279	0.02223	5	5	0.2723	24
															p/h M vs. p/p F	0.1773	0.1232	0.05404	0.02223	5	5	3.439	24
															p/p M vs. h/h F	0.1299	0.2017	-0.07178	0.02223	5	5	4.568	24
															p/p M vs. p/h F	0.1299	0.173	-0.04309	0.02223	5	5	2.741	24
															p/p M vs. p/p F	0.1299	0.1232	0.006676	0.02223	5	5	0.4248	24
															h/h F vs. p/h F	0.2017	0.173	0.0287	0.02223	5	5	1.826	24
															h/h F vs. p/p F	0.2017	0.1232	0.07846	0.02223	5	5	4.992	24
															p/h F vs. p/p F	0.173	0.1232	0.04976	0.02223	5	5	3.166	24

## Sheet: FIG3G
	h/h	p/h	p/p					Ordinary one-way ANOVA							Tukey's multiple comparisons test
Fig. 3G	4.47592	5.47971	6.69376					Table Analyzed	**sAPPa (grouped)						Number of families	1
sAPPa	2.35745	4.91324	4.66963					Data sets analyzed	A-C						Number of comparisons per family	3
	2.9922	6.97475	5.04843												Alpha	0.05
	3.13291	3.46982	5.25879					ANOVA summary
	2.3044	2.88661	5.61179					F	6.725						Tukey's multiple comparisons test	Mean Diff.	95.00% CI of diff.	Significant?	Summary	Adjusted P Value
	4.31129	3.69822	4.37813					P value	0.0043						h/h vs. p/h	-1.191	-2.338 to -0.04313	Yes	*	0.0408	A-B
	4.55701	5.29416	5.7351					P value summary	**						h/h vs. p/p	-1.643	-2.790 to -0.4954	Yes	**	0.004	A-C
	3.55968	6.20319	5.4462					Significant diff. among means (P < 0.05)?	Yes						p/h vs. p/p	-0.4523	-1.600 to 0.6952	No	ns	0.5972	B-C
	5.68599	4.74079	5.30174					R square	0.3325
	2.94782	4.56993	4.60951												Test details	Mean 1	Mean 2	Mean Diff.	SE of diff.	n1	n2	q	DF
								Brown-Forsythe test							h/h vs. p/h	3.632	4.823	-1.191	0.4628	10	10	3.638	27
								F (DFn, DFd)	1.645 (2, 27)						h/h vs. p/p	3.632	5.275	-1.643	0.4628	10	10	5.02	27
								P value	0.2118						p/h vs. p/p	4.823	5.275	-0.4523	0.4628	10	10	1.382	27
								P value summary	ns
								Are SDs significantly different (P < 0.05)?	No
								Bartlett's test
								Bartlett's statistic (corrected)	3.25
								P value	0.197
								P value summary	ns
								Are SDs significantly different (P < 0.05)?	No
								ANOVA table	SS	DF	MS	F (DFn, DFd)	P value
								Treatment (between columns)	14.4	2	7.202	F (2, 27) = 6.725	P=0.0043
								Residual (within columns)	28.91	27	1.071
								Total	43.32	29
								Data summary
								Number of treatments (columns)	3
								Number of values (total)	30
	h/h	p/h	p/p					Ordinary one-way ANOVA							Tukey's multiple comparisons test
Fig. 3F	0.230571	0.178533	0.115665					Table Analyzed	**sAPPb-wt (grouped)						Number of families	1
sAPPb	0.151092	0.142014	0.121368					Data sets analyzed	A-C						Number of comparisons per family	3
	0.229226	0.245851	0.094122												Alpha	0.05
	0.227039	0.155878	0.115492					ANOVA summary
	0.170542	0.1427	0.16952					F	12.64						Tukey's multiple comparisons test	Mean Diff.	95.00% CI of diff.	Significant?	Summary	Adjusted P Value
	0.230907	0.118086	0.121714					P value	0.0001						h/h vs. p/h	0.02491	-0.01194 to 0.06177	No	ns	0.2325	A-B
	0.205633	0.221317	0.152802					P value summary	***						h/h vs. p/p	0.07348	0.03662 to 0.1103	Yes	***	0.0001	A-C
	0.158781	0.187527	0.146128					Significant diff. among means (P < 0.05)?	Yes						p/h vs. p/p	0.04856	0.01171 to 0.08542	Yes	**	0.008	B-C
	0.240986	0.183287	0.11774					R square	0.4836
	0.155707	0.176154	0.111164												Test details	Mean 1	Mean 2	Mean Diff.	SE of diff.	n1	n2	q	DF
								Brown-Forsythe test							h/h vs. p/h	0.2	0.1751	0.02491	0.01486	10	10	2.37	27
								F (DFn, DFd)	1.511 (2, 27)						h/h vs. p/p	0.2	0.1266	0.07348	0.01486	10	10	6.991	27
								P value	0.2387						p/h vs. p/p	0.1751	0.1266	0.04856	0.01486	10	10	4.621	27
								P value summary	ns
								Are SDs significantly different (P < 0.05)?	No
								Bartlett's test
								Bartlett's statistic (corrected)	2.571
								P value	0.2765
								P value summary	ns
								Are SDs significantly different (P < 0.05)?	No
								ANOVA table	SS	DF	MS	F (DFn, DFd)	P value
								Treatment (between columns)	0.02793	2	0.01396	F (2, 27) = 12.64	P=0.0001
								Residual (within columns)	0.02982	27	0.001105
								Total	0.05775	29
								Data summary
								Number of treatments (columns)	3
								Number of values (total)	30
