# Supplementary material for: Opposite changes in APP processing and human Aβ levels in rats carrying either a protective or a pathogenic APP mutation
Source: eLife. 2020 Feb 5;9:e52612. doi: 10.7554/eLife.52612 (PMC7018507; doi:10.7554/eLife.52612)
Supplement: Figure 4—source data 1. [file elife-52612-fig4-data1.xlsx]

## Sheet: FIG4A
	h/h M	p/h M	p/p M					Ordinary one-way ANOVA
Fig. 4A	2.35763	1.85721	2.04254					P value summary	ns
Total APP male	1.86069	2.17947	2.32507					Significant diff. among means (P < 0.05)?	No
	2.23722	2.77441	2.42281					R square	0.2264
	2.01422	2.47408	2.22232
	1.46345	2.12928	2.62867					Brown-Forsythe test
								F (DFn, DFd)	0.3930 (2, 12)
								P value	0.6834
								P value summary	ns
								Are SDs significantly different (P < 0.05)?	No
								Bartlett's test
								Bartlett's statistic (corrected)	0.9338
								P value	0.6269
								P value summary	ns
								Are SDs significantly different (P < 0.05)?	No
								ANOVA table	SS	DF	MS	F (DFn, DFd)	P value
								Treatment (between columns)	0.3442	2	0.1721	F (2, 12) = 1.756	P=0.2144
								Residual (within columns)	1.176	12	0.09804
								Total	1.521	14
								Data summary
								Number of treatments (columns)	3
								Number of values (total)	15
	h/h F	p/h F	p/p F					Ordinary one-way ANOVA
Fig. 4A	4.58961	1.52251	2.85025					Table Analyzed	total APP F
Total APP female	3.27472	1.406	2.6136					Data sets analyzed	A-C
	2.43232	1.37653	2.56982
	1.55828	1.34179	2.30741					ANOVA summary
	1.30406	2.27115	2.08163					F	2.367
								P value	0.136
								P value summary	ns
								Significant diff. among means (P < 0.05)?	No
								R square	0.2829
								Brown-Forsythe test
								F (DFn, DFd)	3.994 (2, 12)
								P value	0.0468
								P value summary	*
								Are SDs significantly different (P < 0.05)?	Yes
								Bartlett's test
								Bartlett's statistic (corrected)	9.251
								P value	0.0098
								P value summary	**
								Are SDs significantly different (P < 0.05)?	Yes
								ANOVA table	SS	DF	MS	F (DFn, DFd)	P value
								Treatment (between columns)	3.22	2	1.61	F (2, 12) = 2.367	P=0.1360
								Residual (within columns)	8.162	12	0.6802
								Total	11.38	14
								Data summary
								Number of treatments (columns)	3
								Number of values (total)	15

## Sheet: FIG4B
	h/h M	p/h M	p/p M					Ordinary one-way ANOVA
Fig. 4B	0.736198	0.877141	0.681145					Table Analyzed	imAPP M
imAPP male	0.835085	0.80592	0.832708					Data sets analyzed	A-C
	0.910537	1.26207	0.857634
	0.877122	0.96707	0.89735					ANOVA summary
	0.620791	0.71219	0.86895					F	1.036
								P value	0.3846
								P value summary	ns
								Significant diff. among means (P < 0.05)?	No
								R square	0.1472
								Brown-Forsythe test
								F (DFn, DFd)	0.9556 (2, 12)
								P value	0.412
								P value summary	ns
								Are SDs significantly different (P < 0.05)?	No
								Bartlett's test
								Bartlett's statistic (corrected)	3.044
								P value	0.2183
								P value summary	ns
								Are SDs significantly different (P < 0.05)?	No
								ANOVA table	SS	DF	MS	F (DFn, DFd)	P value
								Treatment (between columns)	0.04516	2	0.02258	F (2, 12) = 1.036	P=0.3846
								Residual (within columns)	0.2616	12	0.0218
								Total	0.3068	14
								Data summary
								Number of treatments (columns)	3
								Number of values (total)	15
	h/h F	p/h F	p/p F					Ordinary one-way ANOVA							Tukey's multiple comparisons test
Fig. 4B	1.7254	0.701749	1.12964					Table Analyzed	imAPP F						Number of families	1
imAPP female	1.44101	0.54217	1.04227					Data sets analyzed	A-C						Number of comparisons per family	3
	1.0737	0.475062	0.935091												Alpha	0.05
	0.721804	0.537125	1.00219					ANOVA summary
	0.580262	0.776124	0.929933					F	4.18						Tukey's multiple comparisons test	Mean Diff.	95.00% CI of diff.	Significant?	Summary	Adjusted P Value
								P value	0.0419						h/h F vs. p/h F	0.502	0.01190 to 0.9921	Yes	*	0.0446	A-B
								P value summary	*						h/h F vs. p/p F	0.1006	-0.3895 to 0.5907	No	ns	0.8496	A-C
								Significant diff. among means (P < 0.05)?	Yes						p/h F vs. p/p F	-0.4014	-0.8915 to 0.08872	No	ns	0.1144	B-C
								R square	0.4106
															Test details	Mean 1	Mean 2	Mean Diff.	SE of diff.	n1	n2	q	DF
								Brown-Forsythe test							h/h F vs. p/h F	1.108	0.6064	0.502	0.1837	5	5	3.865	12
								F (DFn, DFd)	6.254 (2, 12)						h/h F vs. p/p F	1.108	1.008	0.1006	0.1837	5	5	0.7745	12
								P value	0.0138						p/h F vs. p/p F	0.6064	1.008	-0.4014	0.1837	5	5	3.09	12
								P value summary	*
								Are SDs significantly different (P < 0.05)?	Yes
								Bartlett's test
								Bartlett's statistic (corrected)	11.4
								P value	0.0033
								P value summary	**
								Are SDs significantly different (P < 0.05)?	Yes
								ANOVA table	SS	DF	MS	F (DFn, DFd)	P value
								Treatment (between columns)	0.7054	2	0.3527	F (2, 12) = 4.180	P=0.0419
								Residual (within columns)	1.012	12	0.08437
								Total	1.718	14
								Data summary
								Number of treatments (columns)	3
								Number of values (total)	15

## Sheet: FIG4C
	h/h M	p/h M	p/p M					Ordinary one-way ANOVA
Fig. 4C	1.49436	1.07557	1.32537					Table Analyzed	mAPP M
mAPP male	1.07389	1.42092	1.44879					Data sets analyzed	A-C
	1.47002	1.42749	1.55493
	1.35824	1.43473	1.36707					ANOVA summary
	0.923311	1.36153	1.63415					F	1.493
								P value	0.2635
								P value summary	ns
								Significant diff. among means (P < 0.05)?	No
								R square	0.1993
								Brown-Forsythe test
								F (DFn, DFd)	0.9503 (2, 12)
								P value	0.4139
								P value summary	ns
								Are SDs significantly different (P < 0.05)?	No
								Bartlett's test
								Bartlett's statistic (corrected)	1.878
								P value	0.3911
								P value summary	ns
								Are SDs significantly different (P < 0.05)?	No
								ANOVA table	SS	DF	MS	F (DFn, DFd)	P value
								Treatment (between columns)	0.1036	2	0.05179	F (2, 12) = 1.493	P=0.2635
								Residual (within columns)	0.4161	12	0.03468
								Total	0.5197	14
								Data summary
								Number of treatments (columns)	3
								Number of values (total)	15
	h/h F	p/h F	p/p F					Ordinary one-way ANOVA
Fig. 4C	2.88613	0.904576	1.93008					Table Analyzed	mAPP F
mAPP female	1.91981	0.935886	1.68682					Data sets analyzed	A-C
	1.3847	0.970975	1.9222
	0.994223	0.868796	1.45579					ANOVA summary
	0.820437	1.48427	1.25838					F	2.09
								P value	0.1665
								P value summary	ns
								Significant diff. among means (P < 0.05)?	No
								R square	0.2583
								Brown-Forsythe test
								F (DFn, DFd)	2.348 (2, 12)
								P value	0.1378
								P value summary	ns
								Are SDs significantly different (P < 0.05)?	No
								Bartlett's test
								Bartlett's statistic (corrected)	6.295
								P value	0.043
								P value summary	*
								Are SDs significantly different (P < 0.05)?	Yes
								ANOVA table	SS	DF	MS	F (DFn, DFd)	P value
								Treatment (between columns)	1.178	2	0.5891	F (2, 12) = 2.090	P=0.1665
								Residual (within columns)	3.383	12	0.2819
								Total	4.561	14
								Data summary
								Number of treatments (columns)	3
								Number of values (total)	15

## Sheet: FIG4D
	h/h M	p/h M	p/p M					Ordinary one-way ANOVA
Fig. 4D	2.02984	1.22622	1.9458					Table Analyzed	mAPP/imAPP M
mAPP/imAPP male	1.28596	1.7631	1.73985					Data sets analyzed	A-C
	1.61446	1.13108	1.81305
	1.54851	1.48358	1.52346					ANOVA summary
	1.48731	1.91175	1.88061					F	1.406
								P value	0.2828
								P value summary	ns
								Significant diff. among means (P < 0.05)?	No
								R square	0.1898
								Brown-Forsythe test
								F (DFn, DFd)	1.115 (2, 12)
								P value	0.3596
								P value summary	ns
								Are SDs significantly different (P < 0.05)?	No
								Bartlett's test
								Bartlett's statistic (corrected)	1.741
								P value	0.4188
								P value summary	ns
								Are SDs significantly different (P < 0.05)?	No
								ANOVA table	SS	DF	MS	F (DFn, DFd)	P value
								Treatment (between columns)	0.2003	2	0.1001	F (2, 12) = 1.406	P=0.2828
								Residual (within columns)	0.8549	12	0.07124
								Total	1.055	14
								Data summary
								Number of treatments (columns)	3
								Number of values (total)	15
	h/h F	p/h F	p/p F					Ordinary one-way ANOVA
Fig. 4D	1.67273	1.28903	1.70857					Table Analyzed	mAPP/imAPP F
mAPP/imAPP female	1.33227	1.72618	1.61841					Data sets analyzed	A-C
	1.28965	2.04389	2.05563
	1.37742	1.61749	1.45261					ANOVA summary
	1.41391	1.91242	1.35319					F	2.009
								P value	0.1768
								P value summary	ns
								Significant diff. among means (P < 0.05)?	No
								R square	0.2508
								Brown-Forsythe test
								F (DFn, DFd)	0.8295 (2, 12)
								P value	0.4598
								P value summary	ns
								Are SDs significantly different (P < 0.05)?	No
								Bartlett's test
								Bartlett's statistic (corrected)	1.593
								P value	0.451
								P value summary	ns
								Are SDs significantly different (P < 0.05)?	No
								ANOVA table	SS	DF	MS	F (DFn, DFd)	P value
								Treatment (between columns)	0.2423	2	0.1212	F (2, 12) = 2.009	P=0.1768
								Residual (within columns)	0.7238	12	0.06032
								Total	0.9662	14
								Data summary
								Number of treatments (columns)	3
								Number of values (total)	15

## Sheet: FIG4E
	h/h M	p/h M	p/p M					Ordinary one-way ANOVA							Tukey's multiple comparisons test
Fig. 4E	0.475365	0.350737	0.223667					Table Analyzed	bCTF M						Number of families	1
bCTF male	0.290996	0.371099	0.279197					Data sets analyzed	A-C						Number of comparisons per family	3
	0.320494	0.529531	0.322626												Alpha	0.05
	0.414658	0.497807	0.292563					ANOVA summary
	0.367646	0.407567	0.389979					F	4.131						Tukey's multiple comparisons test	Mean Diff.	95.00% CI of diff.	Significant?	Summary	Adjusted P Value
								P value	0.0431						h/h M vs. p/h M	-0.05752	-0.1782 to 0.06316	No	ns	0.4367	A-B
								P value summary	*						h/h M vs. p/p M	0.07223	-0.04845 to 0.1929	No	ns	0.2844	A-C
								Significant diff. among means (P < 0.05)?	Yes						p/h M vs. p/p M	0.1297	0.009066 to 0.2504	Yes	*	0.0351	B-C
								R square	0.4078
															Test details	Mean 1	Mean 2	Mean Diff.	SE of diff.	n1	n2	q	DF
								Brown-Forsythe test							h/h M vs. p/h M	0.3738	0.4313	-0.05752	0.04523	5	5	1.798	12
								F (DFn, DFd)	0.2681 (2, 12)						h/h M vs. p/p M	0.3738	0.3016	0.07223	0.04523	5	5	2.258	12
								P value	0.7693						p/h M vs. p/p M	0.4313	0.3016	0.1297	0.04523	5	5	4.056	12
								P value summary	ns
								Are SDs significantly different (P < 0.05)?	No
								Bartlett's test
								Bartlett's statistic (corrected)	0.2388
								P value	0.8875
								P value summary	ns
								Are SDs significantly different (P < 0.05)?	No
								ANOVA table	SS	DF	MS	F (DFn, DFd)	P value
								Treatment (between columns)	0.04226	2	0.02113	F (2, 12) = 4.131	P=0.0431
								Residual (within columns)	0.06138	12	0.005115
								Total	0.1036	14
								Data summary
								Number of treatments (columns)	3
								Number of values (total)	15
	h/h F	p/h F	p/p F					Ordinary one-way ANOVA							Tukey's multiple comparisons test
Fig. 4E	1.14836	0.692041	0.443637					Table Analyzed	bCTF F						Number of families	1
bCTF female	0.96643	0.856264	0.405816					Data sets analyzed	A-C						Number of comparisons per family	3
	0.814144	0.560899	0.508944												Alpha	0.05
	0.558602	0.415432	0.551162					ANOVA summary
	0.633722	0.487316	0.508499					F	4.873						Tukey's multiple comparisons test	Mean Diff.	95.00% CI of diff.	Significant?	Summary	Adjusted P Value
								P value	0.0282						h/h F vs. p/h F	0.2219	-0.07366 to 0.5174	No	ns	0.1539	A-B
								P value summary	*						h/h F vs. p/p F	0.3406	0.04511 to 0.6362	Yes	*	0.0242	A-C
								Significant diff. among means (P < 0.05)?	Yes						p/h F vs. p/p F	0.1188	-0.1767 to 0.4143	No	ns	0.5482	B-C
								R square	0.4482
															Test details	Mean 1	Mean 2	Mean Diff.	SE of diff.	n1	n2	q	DF
								Brown-Forsythe test							h/h F vs. p/h F	0.8243	0.6024	0.2219	0.1108	5	5	2.832	12
								F (DFn, DFd)	2.620 (2, 12)						h/h F vs. p/p F	0.8243	0.4836	0.3406	0.1108	5	5	4.349	12
								P value	0.1137						p/h F vs. p/p F	0.6024	0.4836	0.1188	0.1108	5	5	1.516	12
								P value summary	ns
								Are SDs significantly different (P < 0.05)?	No
								Bartlett's test
								Bartlett's statistic (corrected)	5.665
								P value	0.0589
								P value summary	ns
								Are SDs significantly different (P < 0.05)?	No
								ANOVA table	SS	DF	MS	F (DFn, DFd)	P value
								Treatment (between columns)	0.2989	2	0.1495	F (2, 12) = 4.873	P=0.0282
								Residual (within columns)	0.3681	12	0.03068
								Total	0.6671	14
								Data summary
								Number of treatments (columns)	3
								Number of values (total)	15

## Sheet: FIG4F
	h/h M	p/h M	p/p M					Ordinary one-way ANOVA							Tukey's multiple comparisons test
Fig. 4F	0.958827	1.06311	0.738367					Table Analyzed	aCTF M
aCTF male	0.716234	1.10415	1.02888					Data sets analyzed	A-C
	0.846158	1.34372	1.25537
	0.968138	1.29777	1.01085					ANOVA summary
	0.641139	0.9555	1.59683					F	3.276
								P value	0.0732
								P value summary	ns
								Significant diff. among means (P < 0.05)?	No
								R square	0.3532
								Brown-Forsythe test
								F (DFn, DFd)	0.7453 (2, 12)
								P value	0.4954
								P value summary	ns
								Are SDs significantly different (P < 0.05)?	No
								Bartlett's test
								Bartlett's statistic (corrected)	2.812
								P value	0.2451
								P value summary	ns
								Are SDs significantly different (P < 0.05)?	No
								ANOVA table	SS	DF	MS	F (DFn, DFd)	P value
								Treatment (between columns)	0.3291	2	0.1645	F (2, 12) = 3.276	P=0.0732
								Residual (within columns)	0.6027	12	0.05022
								Total	0.9318	14
								Data summary
								Number of treatments (columns)	3
								Number of values (total)	15
	h/h F	p/h F	p/p F					Ordinary one-way ANOVA							Tukey's multiple comparisons test
Fig. 4F	1.99875	1.20352	1.71797					Table Analyzed	aCTF F
aCTF female	1.10627	1.97087	1.66376					Data sets analyzed	A-C
	0.966859	1.11295	1.26299
	0.703131	0.676857	1.4509					ANOVA summary
	0.958824	0.939848	2.01448					F	1.869
								P value	0.1965
								P value summary	ns
								Significant diff. among means (P < 0.05)?	No
								R square	0.2375
								Brown-Forsythe test
								F (DFn, DFd)	0.1444 (2, 12)
								P value	0.867
								P value summary	ns
								Are SDs significantly different (P < 0.05)?	No
								Bartlett's test
								Bartlett's statistic (corrected)	1.237
								P value	0.5387
								P value summary	ns
								Are SDs significantly different (P < 0.05)?	No
								ANOVA table	SS	DF	MS	F (DFn, DFd)	P value
								Treatment (between columns)	0.7028	2	0.3514	F (2, 12) = 1.869	P=0.1965
								Residual (within columns)	2.257	12	0.188
								Total	2.959	14
								Data summary
								Number of treatments (columns)	3
								Number of values (total)	15

## Sheet: Fig4G
	h/h M	p/h M	p/p M					Ordinary one-way ANOVA							Tukey's multiple comparisons test
Fig. 4G	0.495778	0.329917	0.302921					Table Analyzed	bCTF/aCTF M						Number of families	1
bCTF/aCTF male	0.406287	0.336095	0.27136					Data sets analyzed	A-C						Number of comparisons per family	3
	0.378764	0.394079	0.256997												Alpha	0.05
	0.428305	0.383585	0.289424					ANOVA summary
	0.573426	0.426548	0.24422					F	15.15						Tukey's multiple comparisons test	Mean Diff.	95.00% CI of diff.	Significant?	Summary	Adjusted P Value
								P value	0.0005						h/h M vs. p/h M	0.08247	-0.006633 to 0.1716	No	ns	0.0707	A-B
								P value summary	***						h/h M vs. p/p M	0.1835	0.09443 to 0.2726	Yes	***	0.0004	A-C
								Significant diff. among means (P < 0.05)?	Yes						p/h M vs. p/p M	0.1011	0.01196 to 0.1902	Yes	*	0.0265	B-C
								R square	0.7163
															Test details	Mean 1	Mean 2	Mean Diff.	SE of diff.	n1	n2	q	DF
								Brown-Forsythe test							h/h M vs. p/h M	0.4565	0.374	0.08247	0.0334	5	5	3.492	12
								F (DFn, DFd)	1.516 (2, 12)						h/h M vs. p/p M	0.4565	0.273	0.1835	0.0334	5	5	7.771	12
								P value	0.2587						p/h M vs. p/p M	0.374	0.273	0.1011	0.0334	5	5	4.279	12
								P value summary	ns
								Are SDs significantly different (P < 0.05)?	No
								Bartlett's test
								Bartlett's statistic (corrected)	4.785
								P value	0.0914
								P value summary	ns
								Are SDs significantly different (P < 0.05)?	No
								ANOVA table	SS	DF	MS	F (DFn, DFd)	P value
								Treatment (between columns)	0.08449	2	0.04225	F (2, 12) = 15.15	P=0.0005
								Residual (within columns)	0.03346	12	0.002789
								Total	0.118	14
								Data summary
								Number of treatments (columns)	3
								Number of values (total)	15
	h/h F	p/h F	p/p F					Ordinary one-way ANOVA							Tukey's multiple comparisons test
Fig. 4G	0.574542	0.575014	0.258234					Table Analyzed	bCTF/aCTF F						Number of families	1
bCTF/aCTF female	0.873591	0.43446	0.243916					Data sets analyzed	A-C						Number of comparisons per family	3
	0.842051	0.503975	0.402968												Alpha	0.05
	0.794449	0.613766	0.379876					ANOVA summary
	0.660937	0.518505	0.252422					F	27.27						Tukey's multiple comparisons test	Mean Diff.	95.00% CI of diff.	Significant?	Summary	Adjusted P Value
								P value	<0.0001						h/h F vs. p/h F	0.22	0.06044 to 0.3795	Yes	**	0.0082	A-B
								P value summary	****						h/h F vs. p/p F	0.4416	0.2821 to 0.6012	Yes	****	<0.0001	A-C
								Significant diff. among means (P < 0.05)?	Yes						p/h F vs. p/p F	0.2217	0.06213 to 0.3812	Yes	**	0.0078	B-C
								R square	0.8197
															Test details	Mean 1	Mean 2	Mean Diff.	SE of diff.	n1	n2	q	DF
								Brown-Forsythe test							h/h F vs. p/h F	0.7491	0.5291	0.22	0.0598	5	5	5.202	12
								F (DFn, DFd)	0.6642 (2, 12)						h/h F vs. p/p F	0.7491	0.3075	0.4416	0.0598	5	5	10.44	12
								P value	0.5326						p/h F vs. p/p F	0.5291	0.3075	0.2217	0.0598	5	5	5.242	12
								P value summary	ns
								Are SDs significantly different (P < 0.05)?	No
								Bartlett's test
								Bartlett's statistic (corrected)	1.617
								P value	0.4454
								P value summary	ns
								Are SDs significantly different (P < 0.05)?	No
								ANOVA table	SS	DF	MS	F (DFn, DFd)	P value
								Treatment (between columns)	0.4876	2	0.2438	F (2, 12) = 27.27	P<0.0001
								Residual (within columns)	0.1073	12	0.008939
								Total	0.5949	14
								Data summary
								Number of treatments (columns)	3
								Number of values (total)	15
