# Supplementary material for: Opposite changes in APP processing and human Aβ levels in rats carrying either a protective or a pathogenic APP mutation
Source: eLife. 2020 Feb 5;9:e52612. doi: 10.7554/eLife.52612 (PMC7018507; doi:10.7554/eLife.52612)
Supplement: Figure 5—source data 1. [file elife-52612-fig5-data1.xlsx]

## Sheet: FIG5A
	h/h M	s/h M	s/s M	h/h F	s/h F	s/s F		Ordinary one-way ANOVA
Fig. 5A	6.32985	1581.2	175.509	2892.03	0	992.888		Table Analyzed	FIg. 5A-Ab38+p22
Ab38+p22	0	0		2478.64	0	1341.95		Data sets analyzed	A-F
	0	0	175.509	0	0	636.789
	0	0	390.855	0	0	1481.33		ANOVA summary
	0	112.941	581.007	0	354.133	0		F	1.779
								P value	0.157
								P value summary	ns
								Significant diff. among means (P < 0.05)?	No
								R square	0.2789
								Brown-Forsythe test
								F (DFn, DFd)	1.548 (5, 23)
								P value	0.2144
								P value summary	ns
								Are SDs significantly different (P < 0.05)?	No
								Bartlett's test
								Bartlett's statistic (corrected)	55.34
								P value	<0.0001
								P value summary	****
								Are SDs significantly different (P < 0.05)?	Yes
								ANOVA table	SS	DF	MS	F (DFn, DFd)	P value
								Treatment (between columns)	4761907	5	952381	F (5, 23) = 1.779	P=0.1570
								Residual (within columns)	12313131	23	535354
								Total	17075038	28
								Data summary
								Number of treatments (columns)	6
								Number of values (total)	29
	h/h M	s/h M	s/s M	h/h F	s/h F	s/s F		Ordinary one-way ANOVA							Tukey's multiple comparisons test
Fig. 5A	0	1341.37	1844.68	1072.58	1064.62	2148.04		Table Analyzed	FIg. 5A-Ab38						Number of families	1
Ab38	0	723.072		991.518	1111.91	1944.69		Data sets analyzed	A-F						Number of comparisons per family	15
	0	1048.61	1571.22	0	1024.35	1641.81									Alpha	0.05
	0	1056.63	1754.01	0	817.665	2137.01		ANOVA summary
	0	1048.61	1667.09	0	1411	1431.54		F	27.42						Tukey's multiple comparisons test	Mean Diff.	95.00% CI of diff.	Significant?	Summary	Adjusted P Value
								P value	<0.0001						h/h M vs. s/h M	-1044	-1636 to -451.4	Yes	***	0.0002	A-B
								P value summary	****						h/h M vs. s/s M	-1709	-2337 to -1081	Yes	****	<0.0001	A-C
								Significant diff. among means (P < 0.05)?	Yes						h/h M vs. h/h F	-412.8	-1005 to 179.5	No	ns	0.2923	A-D
								R square	0.8563						h/h M vs. s/h F	-1086	-1678 to -493.6	Yes	***	0.0001	A-E
															h/h M vs. s/s F	-1861	-2453 to -1268	Yes	****	<0.0001	A-F
								Brown-Forsythe test							s/h M vs. s/s M	-665.6	-1294 to -37.39	Yes	*	0.0335	B-C
								F (DFn, DFd)	1.425 (5, 23)						s/h M vs. h/h F	630.8	38.56 to 1223	Yes	*	0.0323	B-D
								P value	0.2526						s/h M vs. s/h F	-42.25	-634.5 to 550.0	No	ns	>0.9999	B-E
								P value summary	ns						s/h M vs. s/s F	-817	-1409 to -224.7	Yes	**	0.0034	B-F
								Are SDs significantly different (P < 0.05)?	No						s/s M vs. h/h F	1296	668.2 to 1925	Yes	****	<0.0001	C-D
															s/s M vs. s/h F	623.3	-4.864 to 1252	No	ns	0.0526	C-E
								Bartlett's test							s/s M vs. s/s F	-151.4	-779.6 to 476.8	No	ns	0.9735	C-F
								Bartlett's statistic (corrected)							h/h F vs. s/h F	-673.1	-1265 to -80.81	Yes	*	0.0197	D-E
								P value							h/h F vs. s/s F	-1448	-2040 to -855.5	Yes	****	<0.0001	D-F
								P value summary							s/h F vs. s/s F	-774.7	-1367 to -182.4	Yes	**	0.0057	E-F
								Are SDs significantly different (P < 0.05)?
															Test details	Mean 1	Mean 2	Mean Diff.	SE of diff.	n1	n2	q	DF
								ANOVA table	SS	DF	MS	F (DFn, DFd)	P value		h/h M vs. s/h M	0	1044	-1044	190.9	5	5	7.733	23
								Treatment (between columns)	12485051	5	2497010	F (5, 23) = 27.42	P<0.0001		h/h M vs. s/s M	0	1709	-1709	202.5	5	4	11.94	23
								Residual (within columns)	2094846	23	91080				h/h M vs. h/h F	0	412.8	-412.8	190.9	5	5	3.059	23
								Total	14579897	28					h/h M vs. s/h F	0	1086	-1086	190.9	5	5	8.046	23
															h/h M vs. s/s F	0	1861	-1861	190.9	5	5	13.79	23
								Data summary							s/h M vs. s/s M	1044	1709	-665.6	202.5	5	4	4.649	23
								Number of treatments (columns)	6						s/h M vs. h/h F	1044	412.8	630.8	190.9	5	5	4.674	23
								Number of values (total)	29						s/h M vs. s/h F	1044	1086	-42.25	190.9	5	5	0.3131	23
															s/h M vs. s/s F	1044	1861	-817	190.9	5	5	6.053	23
															s/s M vs. h/h F	1709	412.8	1296	202.5	4	5	9.056	23
															s/s M vs. s/h F	1709	1086	623.3	202.5	4	5	4.354	23
															s/s M vs. s/s F	1709	1861	-151.4	202.5	4	5	1.057	23
															h/h F vs. s/h F	412.8	1086	-673.1	190.9	5	5	4.987	23
															h/h F vs. s/s F	412.8	1861	-1448	190.9	5	5	10.73	23
															s/h F vs. s/s F	1086	1861	-774.7	190.9	5	5	5.74	23

## Sheet: FIG5B
	h/h M	s/h M	s/s M	h/h F	s/h F	s/s F		Ordinary one-way ANOVA							Tukey's multiple comparisons test
Fig. 5B	2249.26	4800.97	7027.43	1521.94	4522.59	8977.64		Table Analyzed	FIg. 5B-Ab40+p24						Number of families	1
Ab40+p24	1766.97	3923.88		1433.73	4808.68	8895.65		Data sets analyzed	A-F						Number of comparisons per family	15
	2290.63	4871.41	7216.84	1672.91	4357.51	7782.02									Alpha	0.05
	1694.85	4900	7346.94	1783.34	5064.39	9047.97		ANOVA summary
	1518.88	4805.9	7546.44	1411.69	5529.25	5967.3		F	86.85						Tukey's multiple comparisons test	Mean Diff.	95.00% CI of diff.	Significant?	Summary	Adjusted P Value
								P value	<0.0001						h/h M vs. s/h M	-2756	-3998 to -1514	Yes	****	<0.0001	A-B
								P value summary	****						h/h M vs. s/s M	-5380	-6698 to -4063	Yes	****	<0.0001	A-C
								Significant diff. among means (P < 0.05)?	Yes						h/h M vs. h/h F	339.4	-902.8 to 1582	No	ns	0.955	A-D
								R square	0.9497						h/h M vs. s/h F	-2952	-4195 to -1710	Yes	****	<0.0001	A-E
															h/h M vs. s/s F	-6230	-7472 to -4988	Yes	****	<0.0001	A-F
								Brown-Forsythe test							s/h M vs. s/s M	-2624	-3941 to -1306	Yes	****	<0.0001	B-C
								F (DFn, DFd)	1.130 (5, 23)						s/h M vs. h/h F	3096	1854 to 4338	Yes	****	<0.0001	B-D
								P value	0.3728						s/h M vs. s/h F	-196.1	-1438 to 1046	No	ns	0.9961	B-E
								P value summary	ns						s/h M vs. s/s F	-3474	-4716 to -2232	Yes	****	<0.0001	B-F
								Are SDs significantly different (P < 0.05)?	No						s/s M vs. h/h F	5720	4402 to 7037	Yes	****	<0.0001	C-D
															s/s M vs. s/h F	2428	1110 to 3745	Yes	***	0.0001	C-E
								Bartlett's test							s/s M vs. s/s F	-849.7	-2167 to 467.8	No	ns	0.3718	C-F
								Bartlett's statistic (corrected)	20.18						h/h F vs. s/h F	-3292	-4534 to -2050	Yes	****	<0.0001	D-E
								P value	0.0012						h/h F vs. s/s F	-6569	-7812 to -5327	Yes	****	<0.0001	D-F
								P value summary	**						s/h F vs. s/s F	-3278	-4520 to -2035	Yes	****	<0.0001	E-F
								Are SDs significantly different (P < 0.05)?	Yes
															Test details	Mean 1	Mean 2	Mean Diff.	SE of diff.	n1	n2	q	DF
								ANOVA table	SS	DF	MS	F (DFn, DFd)	P value		h/h M vs. s/h M	1904	4660	-2756	400.3	5	5	9.738	23
								Treatment (between columns)	173963125	5	34792625	F (5, 23) = 86.85	P<0.0001		h/h M vs. s/s M	1904	7284	-5380	424.6	5	4	17.92	23
								Residual (within columns)	9214184	23	400617				h/h M vs. h/h F	1904	1565	339.4	400.3	5	5	1.199	23
								Total	183177309	28					h/h M vs. s/h F	1904	4856	-2952	400.3	5	5	10.43	23
															h/h M vs. s/s F	1904	8134	-6230	400.3	5	5	22.01	23
								Model comparison	SS	DF	Probability it is correct				s/h M vs. s/s M	4660	7284	-2624	424.6	5	4	8.74	23
								Null H. All population means identical	183177309	28	2.22e-014%				s/h M vs. h/h F	4660	1565	3096	400.3	5	5	10.94	23
								Alternative H: Distinct population means	9214184	23	100%				s/h M vs. s/h F	4660	4856	-196.1	400.3	5	5	0.6926	23
								Ratio of probabilities			0				s/h M vs. s/s F	4660	8134	-3474	400.3	5	5	12.27	23
								Difference in AICc			71.83				s/s M vs. h/h F	7284	1565	5720	424.6	4	5	19.05	23
															s/s M vs. s/h F	7284	4856	2428	424.6	4	5	8.087	23
								Data summary							s/s M vs. s/s F	7284	8134	-849.7	424.6	4	5	2.83	23
								Number of treatments (columns)	6						h/h F vs. s/h F	1565	4856	-3292	400.3	5	5	11.63	23
								Number of values (total)	29						h/h F vs. s/s F	1565	8134	-6569	400.3	5	5	23.21	23
															s/h F vs. s/s F	4856	8134	-3278	400.3	5	5	11.58	23
	h/h M	s/h M	s/s M	h/h F	s/h F	s/s F		Ordinary one-way ANOVA							Tukey's multiple comparisons test
Fig. 5B	1906.54	4711.65	6887.7	1360.5	4418.36	8377.42		ANOVA summary							Number of families	1
Ab40	1629.71	4142.5		1460.9	4642.85	7806.91		F	104.7						Number of comparisons per family	15
	1958.53	4367.2	6796.3	1724.85	4113.78	6991.83		P value	<0.0001						Alpha	0.05
	1600.84	4976.13	6862.81	1963.83	4217.49	7961.69		P value summary	****
	1445.91	4604.31	7163.42	1384.3	5168.49	5626.9		Significant diff. among means (P < 0.05)?	Yes						Tukey's multiple comparisons test	Mean Diff.	95.00% CI of diff.	Significant?	Summary	Adjusted P Value
								R square	0.9579						h/h M vs. s/h M	-2852	-3886 to -1818	Yes	****	<0.0001	A-B
															h/h M vs. s/s M	-5219	-6316 to -4123	Yes	****	<0.0001	A-C
								Brown-Forsythe test							h/h M vs. h/h F	129.4	-904.5 to 1163	No	ns	0.9987	A-D
								F (DFn, DFd)	1.626 (5, 23)						h/h M vs. s/h F	-2804	-3838 to -1770	Yes	****	<0.0001	A-E
								P value	0.1929						h/h M vs. s/s F	-5645	-6679 to -4611	Yes	****	<0.0001	A-F
								P value summary	ns						s/h M vs. s/s M	-2367	-3464 to -1271	Yes	****	<0.0001	B-C
								Are SDs significantly different (P < 0.05)?	No						s/h M vs. h/h F	2981	1948 to 4015	Yes	****	<0.0001	B-D
															s/h M vs. s/h F	48.16	-985.8 to 1082	No	ns	>0.9999	B-E
								Bartlett's test							s/h M vs. s/s F	-2793	-3827 to -1759	Yes	****	<0.0001	B-F
								Bartlett's statistic (corrected)	18.01						s/s M vs. h/h F	5349	4252 to 6445	Yes	****	<0.0001	C-D
								P value	0.0029						s/s M vs. s/h F	2415	1319 to 3512	Yes	****	<0.0001	C-E
								P value summary	**						s/s M vs. s/s F	-425.4	-1522 to 671.2	No	ns	0.8306	C-F
								Are SDs significantly different (P < 0.05)?	Yes						h/h F vs. s/h F	-2933	-3967 to -1899	Yes	****	<0.0001	D-E
															h/h F vs. s/s F	-5774	-6808 to -4740	Yes	****	<0.0001	D-F
								ANOVA table	SS	DF	MS	F (DFn, DFd)	P value		s/h F vs. s/s F	-2841	-3875 to -1807	Yes	****	<0.0001	E-F
								Treatment (between columns)	145304341	5	29060868	F (5, 23) = 104.7	P<0.0001
								Residual (within columns)	6383726	23	277553				Test details	Mean 1	Mean 2	Mean Diff.	SE of diff.	n1	n2	q	DF
								Total	151688067	28					h/h M vs. s/h M	1708	4560	-2852	333.2	5	5	12.11	23
															h/h M vs. s/s M	1708	6928	-5219	353.4	5	4	20.89	23
								Data summary							h/h M vs. h/h F	1708	1579	129.4	333.2	5	5	0.5493	23
								Number of treatments (columns)	6						h/h M vs. s/h F	1708	4512	-2804	333.2	5	5	11.9	23
								Number of values (total)	29						h/h M vs. s/s F	1708	7353	-5645	333.2	5	5	23.96	23
															s/h M vs. s/s M	4560	6928	-2367	353.4	5	4	9.473	23
								Number of treatments (columns)	6						s/h M vs. h/h F	4560	1579	2981	333.2	5	5	12.65	23
								Number of values (total)	30						s/h M vs. s/h F	4560	4512	48.16	333.2	5	5	0.2044	23
															s/h M vs. s/s F	4560	7353	-2793	333.2	5	5	11.85	23
															s/s M vs. h/h F	6928	1579	5349	353.4	4	5	21.4	23
															s/s M vs. s/h F	6928	4512	2415	353.4	4	5	9.665	23
															s/s M vs. s/s F	6928	7353	-425.4	353.4	4	5	1.702	23
															h/h F vs. s/h F	1579	4512	-2933	333.2	5	5	12.45	23
															h/h F vs. s/s F	1579	7353	-5774	333.2	5	5	24.51	23
															s/h F vs. s/s F	4512	7353	-2841	333.2	5	5	12.06	23

## Sheet: FIG5C
	h/h M	s/h M	s/s M	h/h F	s/h F	s/s F		Ordinary one-way ANOVA							Tukey's multiple comparisons test
Fig. 5C	99.0811	257.287	294.729	177.199	191.655	341.413		Table Analyzed	FIg. 5C-Ab42+p26						Number of families	1
Ab42+p26	116.959	193.117		187.232	200.819	341.772		Data sets analyzed	A-F						Number of comparisons per family	15
	135.844	206.963	339.612	97.6899	235.921	373.016									Alpha	0.05
	80.8373	203.667	296.282	99.7729	208.367	443.693		ANOVA summary
	81.6073	202.72	318.338	82.3736	250.979	276.143		F	32.72						Tukey's multiple comparisons test	Mean Diff.	95.00% CI of diff.	Significant?	Summary	Adjusted P Value
								P value	<0.0001						h/h M vs. s/h M	-109.9	-184.4 to -35.38	Yes	**	0.0017	A-B
								P value summary	****						h/h M vs. s/s M	-209.4	-288.4 to -130.3	Yes	****	<0.0001	A-C
								Significant diff. among means (P < 0.05)?	Yes						h/h M vs. h/h F	-25.99	-100.5 to 48.52	No	ns	0.8834	A-D
								R square	0.8767						h/h M vs. s/h F	-114.7	-189.2 to -40.17	Yes	**	0.001	A-E
															h/h M vs. s/s F	-252.3	-326.9 to -177.8	Yes	****	<0.0001	A-F
								Brown-Forsythe test							s/h M vs. s/s M	-99.49	-178.5 to -20.46	Yes	**	0.0082	B-C
								F (DFn, DFd)	0.7544 (5, 23)						s/h M vs. h/h F	83.9	9.389 to 158.4	Yes	*	0.0212	B-D
								P value	0.5915						s/h M vs. s/h F	-4.797	-79.31 to 69.71	No	ns	>0.9999	B-E
								P value summary	ns						s/h M vs. s/s F	-142.5	-217.0 to -67.95	Yes	****	<0.0001	B-F
								Are SDs significantly different (P < 0.05)?	No						s/s M vs. h/h F	183.4	104.4 to 262.4	Yes	****	<0.0001	C-D
															s/s M vs. s/h F	94.69	15.66 to 173.7	Yes	*	0.0127	C-E
								Bartlett's test							s/s M vs. s/s F	-42.97	-122.0 to 36.06	No	ns	0.5532	C-F
								Bartlett's statistic (corrected)	7.253						h/h F vs. s/h F	-88.69	-163.2 to -14.19	Yes	*	0.0134	D-E
								P value	0.2025						h/h F vs. s/s F	-226.4	-300.9 to -151.8	Yes	****	<0.0001	D-F
								P value summary	ns						s/h F vs. s/s F	-137.7	-212.2 to -63.15	Yes	***	0.0001	E-F
								Are SDs significantly different (P < 0.05)?	No
															Test details	Mean 1	Mean 2	Mean Diff.	SE of diff.	n1	n2	q	DF
								ANOVA table	SS	DF	MS	F (DFn, DFd)	P value		h/h M vs. s/h M	102.9	212.8	-109.9	24.01	5	5	6.472	23
								Treatment (between columns)	235802	5	47160	F (5, 23) = 32.72	P<0.0001		h/h M vs. s/s M	102.9	312.2	-209.4	25.47	5	4	11.63	23
								Residual (within columns)	33152	23	1441				h/h M vs. h/h F	102.9	128.9	-25.99	24.01	5	5	1.531	23
								Total	268955	28					h/h M vs. s/h F	102.9	217.5	-114.7	24.01	5	5	6.754	23
															h/h M vs. s/s F	102.9	355.2	-252.3	24.01	5	5	14.86	23
								Model comparison	SS	DF	Probability it is correct				s/h M vs. s/s M	212.8	312.2	-99.49	25.47	5	4	5.525	23
								Null H. All population means identical	268955	28	1.113e-008%				s/h M vs. h/h F	212.8	128.9	83.9	24.01	5	5	4.941	23
								Alternative H: Distinct population means	33152	23	100%				s/h M vs. s/h F	212.8	217.5	-4.797	24.01	5	5	0.2825	23
								Ratio of probabilities			0				s/h M vs. s/s F	212.8	355.2	-142.5	24.01	5	5	8.39	23
								Difference in AICc			45.84				s/s M vs. h/h F	312.2	128.9	183.4	25.47	4	5	10.18	23
															s/s M vs. s/h F	312.2	217.5	94.69	25.47	4	5	5.258	23
								Data summary							s/s M vs. s/s F	312.2	355.2	-42.97	25.47	4	5	2.386	23
								Number of treatments (columns)	6						h/h F vs. s/h F	128.9	217.5	-88.69	24.01	5	5	5.224	23
								Number of values (total)	29						h/h F vs. s/s F	128.9	355.2	-226.4	24.01	5	5	13.33	23
															s/h F vs. s/s F	217.5	355.2	-137.7	24.01	5	5	8.108	23
	h/h M	s/h M	s/s M	h/h F	s/h F	s/s F		Ordinary one-way ANOVA							Tukey's multiple comparisons test
Fig. 5C	47.0347	172.844	224.17	75.6259	130.358	213.025		Table Analyzed	FIg. 5C-Ab42						Number of families	1
Ab42	54.399	143.92		94.368	135.138	210.004		Data sets analyzed	A-F						Number of comparisons per family	15
	54.399	145.779	218.484	42.5277	138.295	229.81									Alpha	0.05
	49.2367	146.397	230.345	58.5838	126.17	246.737		ANOVA summary
	50.1087	138.923	224.17	51.4077	147.939	222.821		F	166.2						Tukey's multiple comparisons test	Mean Diff.	95.00% CI of diff.	Significant?	Summary	Adjusted P Value
								P value	<0.0001						h/h M vs. s/h M	-98.54	-123.3 to -73.74	Yes	****	<0.0001	A-B
								P value summary	****						h/h M vs. s/s M	-173.3	-199.6 to -147.0	Yes	****	<0.0001	A-C
								Significant diff. among means (P < 0.05)?	Yes						h/h M vs. h/h F	-13.47	-38.27 to 11.33	No	ns	0.5545	A-D
								R square	0.9731						h/h M vs. s/h F	-84.54	-109.3 to -59.74	Yes	****	<0.0001	A-E
															h/h M vs. s/s F	-173.4	-198.2 to -148.6	Yes	****	<0.0001	A-F
								Brown-Forsythe test							s/h M vs. s/s M	-74.72	-101.0 to -48.41	Yes	****	<0.0001	B-C
								F (DFn, DFd)	1.535 (5, 23)						s/h M vs. h/h F	85.07	60.27 to 109.9	Yes	****	<0.0001	B-D
								P value	0.2181						s/h M vs. s/h F	13.99	-10.81 to 38.79	No	ns	0.5145	B-E
								P value summary	ns						s/h M vs. s/s F	-74.91	-99.71 to -50.11	Yes	****	<0.0001	B-F
								Are SDs significantly different (P < 0.05)?	No						s/s M vs. h/h F	159.8	133.5 to 186.1	Yes	****	<0.0001	C-D
															s/s M vs. s/h F	88.71	62.41 to 115.0	Yes	****	<0.0001	C-E
								Bartlett's test							s/s M vs. s/s F	-0.1868	-26.49 to 26.12	No	ns	>0.9999	C-F
								Bartlett's statistic (corrected)	13.01						h/h F vs. s/h F	-71.08	-95.88 to -46.28	Yes	****	<0.0001	D-E
								P value	0.0233						h/h F vs. s/s F	-160	-184.8 to -135.2	Yes	****	<0.0001	D-F
								P value summary	*						s/h F vs. s/s F	-88.9	-113.7 to -64.10	Yes	****	<0.0001	E-F
								Are SDs significantly different (P < 0.05)?	Yes
															Test details	Mean 1	Mean 2	Mean Diff.	SE of diff.	n1	n2	q	DF
								ANOVA table	SS	DF	MS	F (DFn, DFd)	P value		h/h M vs. s/h M	51.04	149.6	-98.54	7.992	5	5	17.44	23
								Treatment (between columns)	132686	5	26537	F (5, 23) = 166.2	P<0.0001		h/h M vs. s/s M	51.04	224.3	-173.3	8.477	5	4	28.9	23
								Residual (within columns)	3673	23	159.7				h/h M vs. h/h F	51.04	64.5	-13.47	7.992	5	5	2.383	23
								Total	136359	28					h/h M vs. s/h F	51.04	135.6	-84.54	7.992	5	5	14.96	23
															h/h M vs. s/s F	51.04	224.5	-173.4	7.992	5	5	30.69	23
								Data summary							s/h M vs. s/s M	149.6	224.3	-74.72	8.477	5	4	12.47	23
								Number of treatments (columns)	6						s/h M vs. h/h F	149.6	64.5	85.07	7.992	5	5	15.05	23
								Number of values (total)	29						s/h M vs. s/h F	149.6	135.6	13.99	7.992	5	5	2.476	23
															s/h M vs. s/s F	149.6	224.5	-74.91	7.992	5	5	13.25	23
															s/s M vs. h/h F	224.3	64.5	159.8	8.477	4	5	26.66	23
															s/s M vs. s/h F	224.3	135.6	88.71	8.477	4	5	14.8	23
															s/s M vs. s/s F	224.3	224.5	-0.1868	8.477	4	5	0.03117	23
															h/h F vs. s/h F	64.5	135.6	-71.08	7.992	5	5	12.58	23
															h/h F vs. s/s F	64.5	224.5	-160	7.992	5	5	28.31	23
															s/h F vs. s/s F	135.6	224.5	-88.9	7.992	5	5	15.73	23

## Sheet: FIG5D
	h/h M	s/h M	s/s M	h/h F	s/h F	s/s F		Ordinary one-way ANOVA							Tukey's multiple comparisons test
Fig. 5D	0.0440505	0.0535906	0.0419398	0.11643	0.0423773	0.0380292		Table Analyzed	FIg. 5D-Ab42/Ab40-4G8						Number of families	1
Ab42+p26/Ab40+p24	0.0661921	0.0492159		0.130591	0.0417618	0.0384202		Data sets analyzed	A-F						Number of comparisons per family	15
	0.0593039	0.0424852	0.0470583	0.0583953	0.0541411	0.0479331									Alpha	0.05
	0.0476957	0.0415647	0.0403273	0.0559471	0.0411437	0.0490379		ANOVA summary
	0.0537285	0.0421815	0.0421839	0.0583512	0.0453911	0.0462761		F	4.745						Tukey's multiple comparisons test	Mean Diff.	95.00% CI of diff.	Significant?	Summary
								P value	0.004						h/h M vs. s/h M	0.008387	-0.02333 to 0.04010	No	ns		A-B
								P value summary	**						h/h M vs. s/s M	0.01132	-0.02232 to 0.04496	No	ns		A-C
								Significant diff. among means (P < 0.05)?	Yes						h/h M vs. h/h F	-0.02975	-0.06146 to 0.001966	No	ns		A-D
								R square	0.5078						h/h M vs. s/h F	0.009231	-0.02248 to 0.04095	No	ns		A-E
															h/h M vs. s/s F	0.01025	-0.02146 to 0.04197	No	ns		A-F
								Brown-Forsythe test							s/h M vs. s/s M	0.00293	-0.03071 to 0.03657	No	ns		B-C
								F (DFn, DFd)	1.832 (5, 23)						s/h M vs. h/h F	-0.03814	-0.06985 to -0.006420	Yes	*		B-D
								P value	0.1462						s/h M vs. s/h F	0.0008446	-0.03087 to 0.03256	No	ns		B-E
								P value summary	ns						s/h M vs. s/s F	0.001868	-0.02985 to 0.03358	No	ns		B-F
								Are SDs significantly different (P < 0.05)?	No						s/s M vs. h/h F	-0.04107	-0.07470 to -0.007427	Yes	*		C-D
															s/s M vs. s/h F	-0.002086	-0.03572 to 0.03155	No	ns		C-E
								Bartlett's test							s/s M vs. s/s F	-0.001062	-0.03470 to 0.03258	No	ns		C-F
								Bartlett's statistic (corrected)	31.85						h/h F vs. s/h F	0.03898	0.007265 to 0.07070	Yes	*		D-E
								P value	<0.0001						h/h F vs. s/s F	0.04	0.008289 to 0.07172	Yes	**		D-F
								P value summary	****						s/h F vs. s/s F	0.001024	-0.03069 to 0.03274	No	ns		E-F
								Are SDs significantly different (P < 0.05)?	Yes
															Test details	Mean 1	Mean 2	Mean Diff.	SE of diff.	n1	n2	q	DF
								ANOVA table	SS	DF	MS	F (DFn, DFd)	P value		h/h M vs. s/h M	0.05419	0.04581	0.008387	0.01022	5	5	1.16	23
								Treatment (between columns)	0.006196	5	0.001239	F (5, 23) = 4.745	P=0.0040		h/h M vs. s/s M	0.05419	0.04288	0.01132	0.01084	5	4	1.476	23
								Residual (within columns)	0.006007	23	0.0002612				h/h M vs. h/h F	0.05419	0.08394	-0.02975	0.01022	5	5	4.116	23
								Total	0.0122	28					h/h M vs. s/h F	0.05419	0.04496	0.009231	0.01022	5	5	1.277	23
															h/h M vs. s/s F	0.05419	0.04394	0.01025	0.01022	5	5	1.419	23
								Model comparison	SS	DF	Probability it is correct				s/h M vs. s/s M	0.04581	0.04288	0.00293	0.01084	5	4	0.3823	23
								Null H. All population means identical	0.0122	28	5.51%				s/h M vs. h/h F	0.04581	0.08394	-0.03814	0.01022	5	5	5.277	23
								Alternative H: Distinct population means	0.006007	23	94.49%				s/h M vs. s/h F	0.04581	0.04496	0.0008446	0.01022	5	5	0.1169	23
								Ratio of probabilities			17.15				s/h M vs. s/s F	0.04581	0.04394	0.001868	0.01022	5	5	0.2585	23
								Difference in AICc			5.684				s/s M vs. h/h F	0.04288	0.08394	-0.04107	0.01084	4	5	5.357	23
															s/s M vs. s/h F	0.04288	0.04496	-0.002086	0.01084	4	5	0.2721	23
								Data summary							s/s M vs. s/s F	0.04288	0.04394	-0.001062	0.01084	4	5	0.1385	23
								Number of treatments (columns)	6						h/h F vs. s/h F	0.08394	0.04496	0.03898	0.01022	5	5	5.394	23
								Number of values (total)	29						h/h F vs. s/s F	0.08394	0.04394	0.04	0.01022	5	5	5.535	23
															s/h F vs. s/s F	0.04496	0.04394	0.001024	0.01022	5	5	0.1416	23
	h/h M	s/h M	s/s M	h/h F	s/h F	s/s F		Ordinary one-way ANOVA							Tukey's multiple comparisons test
Fig. 5D	0.0246702	0.0366845	0.0325464	0.0555867	0.0295037	0.0254285		Table Analyzed	FIg. 5D-Ab42/Ab40-6E10
Ab42/Ab40	0.0333796	0.0347422		0.0645959	0.0291067	0.0268997		Data sets analyzed	A-F
	0.0277755	0.0333805	0.0321476	0.0246558	0.0336174	0.0328684
	0.0307568	0.0294199	0.0335643	0.0298315	0.0299159	0.0309905		ANOVA summary
	0.0346555	0.0301724	0.0312938	0.0371361	0.0286232	0.0395992		F	1.735
								P value	0.1667
								P value summary	ns
								Significant diff. among means (P < 0.05)?	No
								R square	0.2738
								Brown-Forsythe test
								F (DFn, DFd)	4.526 (5, 23)
								P value	0.0051
								P value summary	**
								Are SDs significantly different (P < 0.05)?	Yes
								Bartlett's test
								Bartlett's statistic (corrected)	29.83
								P value	<0.0001
								P value summary	****
								Are SDs significantly different (P < 0.05)?	Yes
								ANOVA table	SS	DF	MS	F (DFn, DFd)	P value
								Treatment (between columns)	0.0005336	5	0.0001067	F (5, 23) = 1.735	P=0.1667
								Residual (within columns)	0.001415	23	6.152e-05
								Total	0.001949	28
								Data summary
								Number of treatments (columns)	6
								Number of values (total)	29

## Sheet: FIG5E
	h/h M	s/h M	s/s M	h/h F	s/h F	s/s F		Ordinary one-way ANOVA							Tukey's multiple comparisons test
Fig. 5E	8.82751	2.07535	3.1441	7.05255	3.70786	2.83641		Table Analyzed	FIg. 5E-sAPPa (by sex)						Number of families	1
sAPPa	6.34572	2.65602		3.25212	3.85916	2.40623		Data sets analyzed	A-F						Number of comparisons per family	15
	4.69602	4.18013	2.01668	4.87293	4.22722	1.98319									Alpha	0.05
	4.83497	2.52158	2.7778	4.8707	4.15137	2.73274		ANOVA summary
	3.10996	4.03939	3.17209	4.57773	4.47133	1.56084		F	5.762						Tukey's multiple comparisons test	Mean Diff.	95.00% CI of diff.	Significant?	Summary	Adjusted P Value
								P value	0.0014						h/h M vs. s/h M	2.468	0.1528 to 4.784	Yes	*	0.0321	A-B
								P value summary	**						h/h M vs. s/s M	2.785	0.3291 to 5.241	Yes	*	0.02	A-C
								Significant diff. among means (P < 0.05)?	Yes						h/h M vs. h/h F	0.6376	-1.678 to 2.953	No	ns	0.9535	A-D
								R square	0.5561						h/h M vs. s/h F	1.479	-0.8361 to 3.795	No	ns	0.3817	A-E
															h/h M vs. s/s F	3.259	0.9434 to 5.575	Yes	**	0.0027	A-F
								Brown-Forsythe test							s/h M vs. s/s M	0.3168	-2.139 to 2.773	No	ns	0.9985	B-C
								F (DFn, DFd)	1.330 (5, 23)						s/h M vs. h/h F	-1.831	-4.146 to 0.4848	No	ns	0.1798	B-D
								P value	0.2868						s/h M vs. s/h F	-0.9889	-3.304 to 1.327	No	ns	0.7685	B-E
								P value summary	ns						s/h M vs. s/s F	0.7906	-1.525 to 3.106	No	ns	0.8922	B-F
								Are SDs significantly different (P < 0.05)?	No						s/s M vs. h/h F	-2.148	-4.604 to 0.3085	No	ns	0.1107	C-D
															s/s M vs. s/h F	-1.306	-3.762 to 1.150	No	ns	0.5762	C-E
								Bartlett's test							s/s M vs. s/s F	0.4738	-1.982 to 2.930	No	ns	0.9901	C-F
								Bartlett's statistic (corrected)	16.04						h/h F vs. s/h F	0.8418	-1.474 to 3.157	No	ns	0.8647	D-E
								P value	0.0067						h/h F vs. s/s F	2.621	0.3058 to 4.937	Yes	*	0.0203	D-F
								P value summary	**						s/h F vs. s/s F	1.78	-0.5361 to 4.095	No	ns	0.2028	E-F
								Are SDs significantly different (P < 0.05)?	Yes
															Test details	Mean 1	Mean 2	Mean Diff.	SE of diff.	n1	n2	q	DF
								ANOVA table	SS	DF	MS	F (DFn, DFd)	P value		h/h M vs. s/h M	5.563	3.094	2.468	0.7462	5	5	4.678	23
								Treatment (between columns)	40.11	5	8.022	F (5, 23) = 5.762	P=0.0014		h/h M vs. s/s M	5.563	2.778	2.785	0.7915	5	4	4.976	23
								Residual (within columns)	32.02	23	1.392				h/h M vs. h/h F	5.563	4.925	0.6376	0.7462	5	5	1.208	23
								Total	72.13	28					h/h M vs. s/h F	5.563	4.083	1.479	0.7462	5	5	2.804	23
															h/h M vs. s/s F	5.563	2.304	3.259	0.7462	5	5	6.176	23
								Data summary							s/h M vs. s/s M	3.094	2.778	0.3168	0.7915	5	4	0.5661	23
								Number of treatments (columns)	6						s/h M vs. h/h F	3.094	4.925	-1.831	0.7462	5	5	3.469	23
								Number of values (total)	29						s/h M vs. s/h F	3.094	4.083	-0.9889	0.7462	5	5	1.874	23
															s/h M vs. s/s F	3.094	2.304	0.7906	0.7462	5	5	1.498	23
															s/s M vs. h/h F	2.778	4.925	-2.148	0.7915	4	5	3.837	23
															s/s M vs. s/h F	2.778	4.083	-1.306	0.7915	4	5	2.333	23
															s/s M vs. s/s F	2.778	2.304	0.4738	0.7915	4	5	0.8465	23
															h/h F vs. s/h F	4.925	4.083	0.8418	0.7462	5	5	1.595	23
															h/h F vs. s/s F	4.925	2.304	2.621	0.7462	5	5	4.968	23
															s/h F vs. s/s F	4.083	2.304	1.78	0.7462	5	5	3.372	23

## Sheet: FIG5F
	h/h M	s/h M	s/s M	h/h F	s/h F	s/s F		Ordinary one-way ANOVA							Tukey's multiple comparisons test
Fig. 5F	0.2835	0.072305	0	0.273848	0.092679	0		Table Analyzed	FIg. 5F-sAPPb-wt (by sex)						Number of families	1
sAPPbWT	0.226921	0.087904		0.181895	0.115856	0		Data sets analyzed	A-F						Number of comparisons per family	15
	0.183623	0.100146	0	0.239241	0.088815	0									Alpha	0.05
	0.271537	0.063948	0	0.234573	0.082195	0		ANOVA summary
	0.198701	0.085167	0	0.165195	0.093359	0		F	67.09						Tukey's multiple comparisons test	Mean Diff.	95.00% CI of diff.	Significant?	Summary	Adjusted P Value
								P value	<0.0001						h/h M vs. s/h M	0.151	0.09752 to 0.2044	Yes	****	<0.0001	A-B
								P value summary	****						h/h M vs. s/s M	0.2329	0.1762 to 0.2895	Yes	****	<0.0001	A-C
								Significant diff. among means (P < 0.05)?	Yes						h/h M vs. h/h F	0.01391	-0.03954 to 0.06735	No	ns	0.9632	A-D
								R square	0.9358						h/h M vs. s/h F	0.1383	0.08483 to 0.1917	Yes	****	<0.0001	A-E
															h/h M vs. s/s F	0.2329	0.1794 to 0.2863	Yes	****	<0.0001	A-F
								Brown-Forsythe test							s/h M vs. s/s M	0.08189	0.02521 to 0.1386	Yes	**	0.0021	B-C
								F (DFn, DFd)	4.414 (5, 23)						s/h M vs. h/h F	-0.1371	-0.1905 to -0.08361	Yes	****	<0.0001	B-D
								P value	0.0058						s/h M vs. s/h F	-0.01269	-0.06613 to 0.04076	No	ns	0.9751	B-E
								P value summary	**						s/h M vs. s/s F	0.08189	0.02845 to 0.1353	Yes	**	0.0011	B-F
								Are SDs significantly different (P < 0.05)?	Yes						s/s M vs. h/h F	-0.219	-0.2756 to -0.1623	Yes	****	<0.0001	C-D
															s/s M vs. s/h F	-0.09458	-0.1513 to -0.03789	Yes	***	0.0004	C-E
								Bartlett's test							s/s M vs. s/s F	0	-0.05669 to 0.05669	No	ns	>0.9999	C-F
								Bartlett's statistic (corrected)							h/h F vs. s/h F	0.1244	0.07092 to 0.1778	Yes	****	<0.0001	D-E
								P value							h/h F vs. s/s F	0.219	0.1655 to 0.2724	Yes	****	<0.0001	D-F
								P value summary							s/h F vs. s/s F	0.09458	0.04114 to 0.1480	Yes	***	0.0002	E-F
								Are SDs significantly different (P < 0.05)?
															Test details	Mean 1	Mean 2	Mean Diff.	SE of diff.	n1	n2	q	DF
								ANOVA table	SS	DF	MS	F (DFn, DFd)	P value		h/h M vs. s/h M	0.2329	0.08189	0.151	0.01722	5	5	12.4	23
								Treatment (between columns)	0.2488	5	0.04976	F (5, 23) = 67.09	P<0.0001		h/h M vs. s/s M	0.2329	0	0.2329	0.01827	5	4	18.03	23
								Residual (within columns)	0.01706	23	0.0007416				h/h M vs. h/h F	0.2329	0.219	0.01391	0.01722	5	5	1.142	23
								Total	0.2658	28					h/h M vs. s/h F	0.2329	0.09458	0.1383	0.01722	5	5	11.35	23
															h/h M vs. s/s F	0.2329	0	0.2329	0.01722	5	5	19.12	23
								Data summary							s/h M vs. s/s M	0.08189	0	0.08189	0.01827	5	4	6.34	23
								Number of treatments (columns)	6						s/h M vs. h/h F	0.08189	0.219	-0.1371	0.01722	5	5	11.25	23
								Number of values (total)	29						s/h M vs. s/h F	0.08189	0.09458	-0.01269	0.01722	5	5	1.042	23
															s/h M vs. s/s F	0.08189	0	0.08189	0.01722	5	5	6.724	23
															s/s M vs. h/h F	0	0.219	-0.219	0.01827	4	5	16.95	23
															s/s M vs. s/h F	0	0.09458	-0.09458	0.01827	4	5	7.322	23
															s/s M vs. s/s F	0	0	0	0.01827	4	5	0	23
															h/h F vs. s/h F	0.219	0.09458	0.1244	0.01722	5	5	10.21	23
															h/h F vs. s/s F	0.219	0	0.219	0.01722	5	5	17.98	23
															s/h F vs. s/s F	0.09458	0	0.09458	0.01722	5	5	7.766	23
	h/h M	s/h M	s/s M	h/h F	s/h F	s/s F		Ordinary one-way ANOVA							Tukey's multiple comparisons test
Fig. 5F	0	1.49267	1.85026	0.000329	1.16848	1.7975		Table Analyzed	FIg. 5F-sAPPb-SW (by sex)						Number of families	1
sAPPbSW	0.001039	1.16616		0.000732	1.30675	1.45344		Data sets analyzed	A-F						Number of comparisons per family	15
	0	1.48456	1.69228	0.000429	1.22107	1.51833									Alpha	0.05
	0.001452	1.19315	1.95051	3.7e-05	1.1903	1.82387		ANOVA summary
	0.000834	1.36578	2.07907	0.00166	1.38584	1.5666		F	229.2						Tukey's multiple comparisons test	Mean Diff.	95.00% CI of diff.	Significant?	Summary	Adjusted P Value
								P value	<0.0001						h/h M vs. s/h M	-1.34	-1.572 to -1.107	Yes	****	<0.0001	A-B
								P value summary	****						h/h M vs. s/s M	-1.892	-2.139 to -1.646	Yes	****	<0.0001	A-C
								Significant diff. among means (P < 0.05)?	Yes						h/h M vs. h/h F	2.76e-05	-0.2324 to 0.2325	No	ns	>0.9999	A-D
								R square	0.9803						h/h M vs. s/h F	-1.254	-1.486 to -1.021	Yes	****	<0.0001	A-E
															h/h M vs. s/s F	-1.631	-1.864 to -1.399	Yes	****	<0.0001	A-F
								Brown-Forsythe test							s/h M vs. s/s M	-0.5526	-0.7991 to -0.3060	Yes	****	<0.0001	B-C
								F (DFn, DFd)	3.797 (5, 23)						s/h M vs. h/h F	1.34	1.107 to 1.572	Yes	****	<0.0001	B-D
								P value	0.0118						s/h M vs. s/h F	0.08597	-0.1465 to 0.3184	No	ns	0.8562	B-E
								P value summary	*						s/h M vs. s/s F	-0.2915	-0.5239 to -0.05906	Yes	**	0.0085	B-F
								Are SDs significantly different (P < 0.05)?	Yes						s/s M vs. h/h F	1.892	1.646 to 2.139	Yes	****	<0.0001	C-D
															s/s M vs. s/h F	0.6385	0.3920 to 0.8851	Yes	****	<0.0001	C-E
								Bartlett's test							s/s M vs. s/s F	0.2611	0.01456 to 0.5076	Yes	*	0.0336	C-F
								Bartlett's statistic (corrected)	71.57						h/h F vs. s/h F	-1.254	-1.486 to -1.021	Yes	****	<0.0001	D-E
								P value	<0.0001						h/h F vs. s/s F	-1.631	-1.864 to -1.399	Yes	****	<0.0001	D-F
								P value summary	****						s/h F vs. s/s F	-0.3775	-0.6099 to -0.1450	Yes	***	0.0005	E-F
								Are SDs significantly different (P < 0.05)?	Yes
															Test details	Mean 1	Mean 2	Mean Diff.	SE of diff.	n1	n2	q	DF
								ANOVA table	SS	DF	MS	F (DFn, DFd)	P value		h/h M vs. s/h M	0.000665	1.34	-1.34	0.0749	5	5	25.3	23
								Treatment (between columns)	16.07	5	3.215	F (5, 23) = 229.2	P<0.0001		h/h M vs. s/s M	0.000665	1.893	-1.892	0.07945	5	4	33.69	23
								Residual (within columns)	0.3226	23	0.01403				h/h M vs. h/h F	0.000665	0.0006374	2.76e-05	0.0749	5	5	0.0005211	23
								Total	16.4	28					h/h M vs. s/h F	0.000665	1.254	-1.254	0.0749	5	5	23.67	23
															h/h M vs. s/s F	0.000665	1.632	-1.631	0.0749	5	5	30.8	23
								Data summary							s/h M vs. s/s M	1.34	1.893	-0.5526	0.07945	5	4	9.836	23
								Number of treatments (columns)	6						s/h M vs. h/h F	1.34	0.0006374	1.34	0.0749	5	5	25.3	23
								Number of values (total)	29						s/h M vs. s/h F	1.34	1.254	0.08597	0.0749	5	5	1.623	23
															s/h M vs. s/s F	1.34	1.632	-0.2915	0.0749	5	5	5.503	23
															s/s M vs. h/h F	1.893	0.0006374	1.892	0.07945	4	5	33.69	23
															s/s M vs. s/h F	1.893	1.254	0.6385	0.07945	4	5	11.37	23
															s/s M vs. s/s F	1.893	1.632	0.2611	0.07945	4	5	4.647	23
															h/h F vs. s/h F	0.0006374	1.254	-1.254	0.0749	5	5	23.67	23
															h/h F vs. s/s F	0.0006374	1.632	-1.631	0.0749	5	5	30.8	23
															s/h F vs. s/s F	1.254	1.632	-0.3775	0.0749	5	5	7.127	23
	h/h M	s/h M	s/s M	h/h F	s/h F	s/s F		Ordinary one-way ANOVA							Tukey's multiple comparisons test
Fig. 5F	0.2835	1.56497	1.85026	0.274177	1.26116	1.7975		Table Analyzed	FIg. 5F-sAPPb WT+Sw (by sex)						Number of families	1
sAPPbSW+sAPPbWT	0.22796	1.25406		0.182627	1.4226	1.45344		Data sets analyzed	A-F						Number of comparisons per family	15
	0.183623	1.5847	1.69228	0.23967	1.30989	1.51833									Alpha	0.05
	0.272989	1.2571	1.95051	0.23461	1.2725	1.82387		ANOVA summary
	0.199535	1.45095	2.07907	0.166855	1.4792	1.5666		F	163.1						Tukey's multiple comparisons test	Mean Diff.	95.00% CI of diff.	Significant?	Summary	Adjusted P Value
								P value	<0.0001						h/h M vs. s/h M	-1.189	-1.431 to -0.9469	Yes	****	<0.0001	A-B
								P value summary	****						h/h M vs. s/s M	-1.66	-1.916 to -1.403	Yes	****	<0.0001	A-C
								Significant diff. among means (P < 0.05)?	Yes						h/h M vs. h/h F	0.01393	-0.2280 to 0.2558	No	ns	>0.9999	A-D
								R square	0.9726						h/h M vs. s/h F	-1.116	-1.357 to -0.8737	Yes	****	<0.0001	A-E
															h/h M vs. s/s F	-1.398	-1.640 to -1.157	Yes	****	<0.0001	A-F
								Brown-Forsythe test							s/h M vs. s/s M	-0.4707	-0.7272 to -0.2141	Yes	***	0.0001	B-C
								F (DFn, DFd)	1.969 (5, 23)						s/h M vs. h/h F	1.203	0.9609 to 1.445	Yes	****	<0.0001	B-D
								P value	0.1215						s/h M vs. s/h F	0.07329	-0.1686 to 0.3152	No	ns	0.9317	B-E
								P value summary	ns						s/h M vs. s/s F	-0.2096	-0.4515 to 0.03231	No	ns	0.1162	B-F
								Are SDs significantly different (P < 0.05)?	No						s/s M vs. h/h F	1.673	1.417 to 1.930	Yes	****	<0.0001	C-D
															s/s M vs. s/h F	0.544	0.2874 to 0.8005	Yes	****	<0.0001	C-E
								Bartlett's test							s/s M vs. s/s F	0.2611	0.004514 to 0.5177	Yes	*	0.0445	C-F
								Bartlett's statistic (corrected)	10.99						h/h F vs. s/h F	-1.129	-1.371 to -0.8876	Yes	****	<0.0001	D-E
								P value	0.0516						h/h F vs. s/s F	-1.412	-1.654 to -1.170	Yes	****	<0.0001	D-F
								P value summary	ns						s/h F vs. s/s F	-0.2829	-0.5248 to -0.04098	Yes	*	0.0156	E-F
								Are SDs significantly different (P < 0.05)?	No
															Test details	Mean 1	Mean 2	Mean Diff.	SE of diff.	n1	n2	q	DF
								ANOVA table	SS	DF	MS	F (DFn, DFd)	P value		h/h M vs. s/h M	0.2335	1.422	-1.189	0.07796	5	5	21.57	23
								Treatment (between columns)	12.39	5	2.478	F (5, 23) = 163.1	P<0.0001		h/h M vs. s/s M	0.2335	1.893	-1.66	0.08268	5	4	28.38	23
								Residual (within columns)	0.3494	23	0.01519				h/h M vs. h/h F	0.2335	0.2196	0.01393	0.07796	5	5	0.2528	23
								Total	12.74	28					h/h M vs. s/h F	0.2335	1.349	-1.116	0.07796	5	5	20.24	23
															h/h M vs. s/s F	0.2335	1.632	-1.398	0.07796	5	5	25.37	23
								Data summary							s/h M vs. s/s M	1.422	1.893	-0.4707	0.08268	5	4	8.05	23
								Number of treatments (columns)	6						s/h M vs. h/h F	1.422	0.2196	1.203	0.07796	5	5	21.82	23
								Number of values (total)	29						s/h M vs. s/h F	1.422	1.349	0.07329	0.07796	5	5	1.329	23
															s/h M vs. s/s F	1.422	1.632	-0.2096	0.07796	5	5	3.802	23
															s/s M vs. h/h F	1.893	0.2196	1.673	0.08268	4	5	28.62	23
															s/s M vs. s/h F	1.893	1.349	0.544	0.08268	4	5	9.304	23
															s/s M vs. s/s F	1.893	1.632	0.2611	0.08268	4	5	4.466	23
															h/h F vs. s/h F	0.2196	1.349	-1.129	0.07796	5	5	20.49	23
															h/h F vs. s/s F	0.2196	1.632	-1.412	0.07796	5	5	25.62	23
															s/h F vs. s/s F	1.349	1.632	-0.2829	0.07796	5	5	5.132	23
