# Supplementary material for: Opposite changes in APP processing and human Aβ levels in rats carrying either a protective or a pathogenic APP mutation
Source: eLife. 2020 Feb 5;9:e52612. doi: 10.7554/eLife.52612 (PMC7018507; doi:10.7554/eLife.52612)
Supplement: Figure 6—source data 1. [file elife-52612-fig6-data1.xlsx]

## Sheet: FIG6A
	h/h M	s/h M	s/s M					Ordinary one-way ANOVA							Tukey's multiple comparisons test
Fig. 6A	2.64727	1.52509	1.33996					Table Analyzed	Fig. 6A-total APP M						Number of families	1
Total APP male	1.48334	1.53047	1.23868					Data sets analyzed	A-C						Number of comparisons per family	3
	2.0494	1.67345	1.05558												Alpha	0.05
	2.29784	1.624	0.626797					ANOVA summary
	1.84622	1.4559						F	11.08						Tukey's multiple comparisons test	Mean Diff.	95.00% CI of diff.	Significant?	Summary	Adjusted P Value
								P value	0.0023						h/h M vs. s/h M	0.503	-0.03896 to 1.045	No	ns	0.0694	A-B
								P value summary	**						h/h M vs. s/s M	0.9996	0.4247 to 1.574	Yes	**	0.0017	A-C
								Significant diff. among means (P < 0.05)?	Yes						s/h M vs. s/s M	0.4965	-0.07834 to 1.071	No	ns	0.0927	B-C
								R square	0.6683
															Test details	Mean 1	Mean 2	Mean Diff.	SE of diff.	n1	n2	q	DF
								Brown-Forsythe test							h/h M vs. s/h M	2.065	1.562	0.503	0.2007	5	5	3.545	11
								F (DFn, DFd)	2.373 (2, 11)						h/h M vs. s/s M	2.065	1.065	0.9996	0.2128	5	4	6.641	11
								P value	0.1391						s/h M vs. s/s M	1.562	1.065	0.4965	0.2128	5	4	3.299	11
								P value summary	ns
								Are SDs significantly different (P < 0.05)?	No
								Bartlett's test
								Bartlett's statistic (corrected)	6.944
								P value	0.0311
								P value summary	*
								Are SDs significantly different (P < 0.05)?	Yes
								ANOVA table	SS	DF	MS	F (DFn, DFd)	P value
								Treatment (between columns)	2.231	2	1.116	F (2, 11) = 11.08	P=0.0023
								Residual (within columns)	1.107	11	0.1007
								Total	3.339	13
								Data summary
								Number of treatments (columns)	3
								Number of values (total)	14
	h/h F	s/h F	s/s F					Ordinary one-way ANOVA							Tukey's multiple comparisons test
Fig. 6A	1.00246	0.380321	0.426092					Table Analyzed	Fig. 6A-total APP F
Total APP female	0.556348	0.499492	0.381573					Data sets analyzed	A-C
	0.511568	0.374664	0.281593
	0.403377	0.464594	0.382621					ANOVA summary
	0.397147	0.420033	0.199374					F	2.987
								P value	0.0886
								P value summary	ns
								Significant diff. among means (P < 0.05)?	No
								R square	0.3323
								Brown-Forsythe test
								F (DFn, DFd)	1.116 (2, 12)
								P value	0.3595
								P value summary	ns
								Are SDs significantly different (P < 0.05)?	No
								Bartlett's test
								Bartlett's statistic (corrected)	8.133
								P value	0.0171
								P value summary	*
								Are SDs significantly different (P < 0.05)?	Yes
								ANOVA table	SS	DF	MS	F (DFn, DFd)	P value
								Treatment (between columns)	0.1462	2	0.07312	F (2, 12) = 2.987	P=0.0886
								Residual (within columns)	0.2938	12	0.02448
								Total	0.44	14
								Data summary
								Number of treatments (columns)	3
								Number of values (total)	15

## Sheet: FIG6B
	h/h M	s/h M	s/s M					Ordinary one-way ANOVA
Fig. 6B	0.967831	0.409519	0.60845					Table Analyzed	Fig. 6B-imAPP M
imAPP male	0.431815	0.477764	0.494621					Data sets analyzed	A-C
	0.616725	0.66308	0.363456
	0.648316	0.583193	0.290263					ANOVA summary
	0.568659	0.479373						F	2.125
								P value	0.1658
								P value summary	ns
								Significant diff. among means (P < 0.05)?	No
								R square	0.2787
								Brown-Forsythe test
								F (DFn, DFd)	0.3361 (2, 11)
								P value	0.7217
								P value summary	ns
								Are SDs significantly different (P < 0.05)?	No
								Bartlett's test
								Bartlett's statistic (corrected)	1.577
								P value	0.4546
								P value summary	ns
								Are SDs significantly different (P < 0.05)?	No
								ANOVA table	SS	DF	MS	F (DFn, DFd)	P value
								Treatment (between columns)	0.09892	2	0.04946	F (2, 11) = 2.125	P=0.1658
								Residual (within columns)	0.256	11	0.02327
								Total	0.3549	13
								Data summary
								Number of treatments (columns)	3
								Number of values (total)	14
	h/h F	s/h F	s/s F					Ordinary one-way ANOVA							Tukey's multiple comparisons test
Fig. 6B	0.440535	0.144703	0.201437					Table Analyzed	Fig. 6B-imAPP F
imAPP female	0.206889	0.18137	0.180962					Data sets analyzed	A-C
	0.186833	0.144761	0.138807
	0.149096	0.184553	0.156737					ANOVA summary
	0.16591	0.171921	0.0942148					F	1.516
								P value	0.2589
								P value summary	ns
								Significant diff. among means (P < 0.05)?	No
								R square	0.2017
								Brown-Forsythe test
								F (DFn, DFd)	0.8797 (2, 12)
								P value	0.44
								P value summary	ns
								Are SDs significantly different (P < 0.05)?	No
								Bartlett's test
								Bartlett's statistic (corrected)	10.35
								P value	0.0056
								P value summary	**
								Are SDs significantly different (P < 0.05)?	Yes
								ANOVA table	SS	DF	MS	F (DFn, DFd)	P value
								Treatment (between columns)	0.01659	2	0.008297	F (2, 12) = 1.516	P=0.2589
								Residual (within columns)	0.06568	12	0.005474
								Total	0.08228	14
								Data summary
								Number of treatments (columns)	3
								Number of values (total)	15

## Sheet: FIG6C
	h/h M	s/h M	s/s M					Ordinary one-way ANOVA							Tukey's multiple comparisons test
Fig. 6C	1.37791	0.962225	0.691527					Table Analyzed	Fig. 6C-mAPP M						Number of families	1
mAPP male	0.847713	1.01109	0.682751					Data sets analyzed	A-C						Number of comparisons per family	3
	1.27047	0.960611	0.626671												Alpha	0.05
	1.46053	1.05035	0.315801					ANOVA summary
	1.16932	0.935186						F	15.57						Tukey's multiple comparisons test	Mean Diff.	95.00% CI of diff.	Significant?	Summary	Adjusted P Value
								P value	0.0006						h/h M vs. s/h M	0.2413	-0.05452 to 0.5371	No	ns	0.1146	A-B
								P value summary	***						h/h M vs. s/s M	0.646	0.3322 to 0.9598	Yes	***	0.0005	A-C
								Significant diff. among means (P < 0.05)?	Yes						s/h M vs. s/s M	0.4047	0.09095 to 0.7185	Yes	*	0.013	B-C
								R square	0.739
															Test details	Mean 1	Mean 2	Mean Diff.	SE of diff.	n1	n2	q	DF
								Brown-Forsythe test							h/h M vs. s/h M	1.225	0.9839	0.2413	0.1095	5	5	3.116	11
								F (DFn, DFd)	1.334 (2, 11)						h/h M vs. s/s M	1.225	0.5792	0.646	0.1162	5	4	7.864	11
								P value	0.3028						s/h M vs. s/s M	0.9839	0.5792	0.4047	0.1162	5	4	4.927	11
								P value summary	ns
								Are SDs significantly different (P < 0.05)?	No
								Bartlett's test
								Bartlett's statistic (corrected)	7.001
								P value	0.0302
								P value summary	*
								Are SDs significantly different (P < 0.05)?	Yes
								ANOVA table	SS	DF	MS	F (DFn, DFd)	P value
								Treatment (between columns)	0.9341	2	0.4671	F (2, 11) = 15.57	P=0.0006
								Residual (within columns)	0.3299	11	0.02999
								Total	1.264	13
								Data summary
								Number of treatments (columns)	3
								Number of values (total)	14
	h/h F	s/h F	s/s F					Ordinary one-way ANOVA							Tukey's multiple comparisons test
Fig. 6C	0.499974	0.212542	0.227977					Table Analyzed	Fig. 6C-mAPP F						Number of families	1
mAPP female	0.341336	0.284664	0.168645					Data sets analyzed	A-C						Number of comparisons per family	3
	0.28935	0.203885	0.106352												Alpha	0.05
	0.208779	0.255901	0.190596					ANOVA summary
	0.223042	0.226203	0.0600311					F	5.053						Tukey's multiple comparisons test	Mean Diff.	95.00% CI of diff.	Significant?	Summary	Adjusted P Value
								P value	0.0256						h/h F vs. s/h F	0.07586	-0.05999 to 0.2117	No	ns	0.3299	A-B
								P value summary	*						h/h F vs. s/s F	0.1618	0.02593 to 0.2976	Yes	*	0.0202	A-C
								Significant diff. among means (P < 0.05)?	Yes						s/h F vs. s/s F	0.08592	-0.04993 to 0.2218	No	ns	0.2497	B-C
								R square	0.4572
															Test details	Mean 1	Mean 2	Mean Diff.	SE of diff.	n1	n2	q	DF
								Brown-Forsythe test							h/h F vs. s/h F	0.3125	0.2366	0.07586	0.05092	5	5	2.107	12
								F (DFn, DFd)	1.473 (2, 12)						h/h F vs. s/s F	0.3125	0.1507	0.1618	0.05092	5	5	4.493	12
								P value	0.2678						s/h F vs. s/s F	0.2366	0.1507	0.08592	0.05092	5	5	2.386	12
								P value summary	ns
								Are SDs significantly different (P < 0.05)?	No
								Bartlett's test
								Bartlett's statistic (corrected)	4.928
								P value	0.0851
								P value summary	ns
								Are SDs significantly different (P < 0.05)?	No
								ANOVA table	SS	DF	MS	F (DFn, DFd)	P value
								Treatment (between columns)	0.06551	2	0.03276	F (2, 12) = 5.053	P=0.0256
								Residual (within columns)	0.07779	12	0.006482
								Total	0.1433	14
								Data summary
								Number of treatments (columns)	3
								Number of values (total)	15

## Sheet: FIG6D
	h/h M	s/h M	s/s M					Ordinary one-way ANOVA							Tukey's multiple comparisons test
Fig. 6D	1.42371	2.34965	1.13654					Table Analyzed	Fig. 6D-mAPP/imAPP M						Number of families	1
mAPP/imAPP male	1.96314	2.1163	1.38035					Data sets analyzed	A-C						Number of comparisons per family	3
	2.06003	1.44871	1.7242												Alpha	0.05
	2.2528	1.80103	1.08798					ANOVA summary
	2.05627	1.95085						F	5.292						Tukey's multiple comparisons test	Mean Diff.	95.00% CI of diff.	Significant?	Summary	Adjusted P Value
								P value	0.0245						h/h M vs. s/h M	0.01788	-0.5237 to 0.5594	No	ns	0.9956	A-B
								P value summary	*						h/h M vs. s/s M	0.6189	0.04453 to 1.193	Yes	*	0.035	A-C
								Significant diff. among means (P < 0.05)?	Yes						s/h M vs. s/s M	0.601	0.02664 to 1.175	Yes	*	0.0404	B-C
								R square	0.4904
															Test details	Mean 1	Mean 2	Mean Diff.	SE of diff.	n1	n2	q	DF
								Brown-Forsythe test							h/h M vs. s/h M	1.951	1.933	0.01788	0.2005	5	5	0.1261	11
								F (DFn, DFd)	0.08955 (2, 11)						h/h M vs. s/s M	1.951	1.332	0.6189	0.2127	5	4	4.116	11
								P value	0.915						s/h M vs. s/s M	1.933	1.332	0.601	0.2127	5	4	3.997	11
								P value summary	ns
								Are SDs significantly different (P < 0.05)?	No
								Bartlett's test
								Bartlett's statistic (corrected)	0.07153
								P value	0.9649
								P value summary	ns
								Are SDs significantly different (P < 0.05)?	No
								ANOVA table	SS	DF	MS	F (DFn, DFd)	P value
								Treatment (between columns)	1.064	2	0.5319	F (2, 11) = 5.292	P=0.0245
								Residual (within columns)	1.106	11	0.1005
								Total	2.169	13
								Data summary
								Number of treatments (columns)	3
								Number of values (total)	14
	h/h F	s/h F	s/s F					Ordinary one-way ANOVA							Tukey's multiple comparisons test
Fig. 6D	1.13492	1.46881	1.13175					Table Analyzed	Fig. 6D-mAPP/imAPP F						Number of families	1
mAPP/imAPP female	1.64985	1.56952	0.931935					Data sets analyzed	A-C						Number of comparisons per family	3
	1.54871	1.40842	0.766186												Alpha	0.05
	1.4003	1.3866	1.21602					ANOVA summary
	1.34436	1.31574	0.637173					F	11.05						Tukey's multiple comparisons test	Mean Diff.	95.00% CI of diff.	Significant?	Summary	Adjusted P Value
								P value	0.0019						h/h F vs. s/h F	-0.01419	-0.3328 to 0.3044	No	ns	0.9923	A-B
								P value summary	**						h/h F vs. s/s F	0.479	0.1604 to 0.7976	Yes	**	0.0045	A-C
								Significant diff. among means (P < 0.05)?	Yes						s/h F vs. s/s F	0.4932	0.1746 to 0.8118	Yes	**	0.0037	B-C
								R square	0.6481
															Test details	Mean 1	Mean 2	Mean Diff.	SE of diff.	n1	n2	q	DF
								Brown-Forsythe test							h/h F vs. s/h F	1.416	1.43	-0.01419	0.1194	5	5	0.168	12
								F (DFn, DFd)	1.787 (2, 12)						h/h F vs. s/s F	1.416	0.9366	0.479	0.1194	5	5	5.672	12
								P value	0.2092						s/h F vs. s/s F	1.43	0.9366	0.4932	0.1194	5	5	5.84	12
								P value summary	ns
								Are SDs significantly different (P < 0.05)?	No
								Bartlett's test
								Bartlett's statistic (corrected)	2.786
								P value	0.2483
								P value summary	ns
								Are SDs significantly different (P < 0.05)?	No
								ANOVA table	SS	DF	MS	F (DFn, DFd)	P value
								Treatment (between columns)	0.7882	2	0.3941	F (2, 12) = 11.05	P=0.0019
								Residual (within columns)	0.4279	12	0.03566
								Total	1.216	14
								Data summary
								Number of treatments (columns)	3
								Number of values (total)	15

## Sheet: FIG6E
	h/h M	s/h M	s/s M					Ordinary one-way ANOVA							Tukey's multiple comparisons test
Fig. 6E	0.423925	0.70915	1.20529					Table Analyzed	Fig. 6E-bCTF M						Number of families	1
bCTF male	0.185786	0.761326	1.04404					Data sets analyzed	A-C						Number of comparisons per family	3
	0.197307	0.564768	0.807896												Alpha	0.05
	0.361228	0.579547	0.388458					ANOVA summary
	0.445624	0.674846						F	7.926						Tukey's multiple comparisons test	Mean Diff.	95.00% CI of diff.	Significant?	Summary	Adjusted P Value
								P value	0.0074						h/h M vs. s/h M	-0.3352	-0.6874 to 0.01714	No	ns	0.0625	A-B
								P value summary	**						h/h M vs. s/s M	-0.5386	-0.9123 to -0.1650	Yes	**	0.0065	A-C
								Significant diff. among means (P < 0.05)?	Yes						s/h M vs. s/s M	-0.2035	-0.5772 to 0.1702	No	ns	0.3412	B-C
								R square	0.5903
															Test details	Mean 1	Mean 2	Mean Diff.	SE of diff.	n1	n2	q	DF
								Brown-Forsythe test							h/h M vs. s/h M	0.3228	0.6579	-0.3352	0.1304	5	5	3.634	11
								F (DFn, DFd)	3.622 (2, 11)						h/h M vs. s/s M	0.3228	0.8614	-0.5386	0.1384	5	4	5.506	11
								P value	0.0619						s/h M vs. s/s M	0.6579	0.8614	-0.2035	0.1384	5	4	2.08	11
								P value summary	ns
								Are SDs significantly different (P < 0.05)?	No
								Bartlett's test
								Bartlett's statistic (corrected)	7.102
								P value	0.0287
								P value summary	*
								Are SDs significantly different (P < 0.05)?	Yes
								ANOVA table	SS	DF	MS	F (DFn, DFd)	P value
								Treatment (between columns)	0.6742	2	0.3371	F (2, 11) = 7.926	P=0.0074
								Residual (within columns)	0.4679	11	0.04254
								Total	1.142	13
								Data summary
								Number of treatments (columns)	3
								Number of values (total)	14
	h/h F	s/h F	s/s F					Ordinary one-way ANOVA							Tukey's multiple comparisons test
Fig. 6E	0.132096	0.223641	0.473056					Table Analyzed	Fig. 6E-bCTF F						Number of families	1
bCTF female	0.0922966	0.213016	0.427594					Data sets analyzed	A-C						Number of comparisons per family	3
	0.106755	0.147964	0.223688												Alpha	0.05
	0.110353	0.27873	0.359199					ANOVA summary
	0.148527	0.184916	0.105542					F	5.819						Tukey's multiple comparisons test	Mean Diff.	95.00% CI of diff.	Significant?	Summary	Adjusted P Value
								P value	0.0171						h/h F vs. s/h F	-0.09165	-0.2481 to 0.06479	No	ns	0.2983	A-B
								P value summary	*						h/h F vs. s/s F	-0.1998	-0.3563 to -0.04337	Yes	*	0.0133	A-C
								Significant diff. among means (P < 0.05)?	Yes						s/h F vs. s/s F	-0.1082	-0.2646 to 0.04828	No	ns	0.1972	B-C
								R square	0.4923
															Test details	Mean 1	Mean 2	Mean Diff.	SE of diff.	n1	n2	q	DF
								Brown-Forsythe test							h/h F vs. s/h F	0.118	0.2097	-0.09165	0.05864	5	5	2.21	12
								F (DFn, DFd)	4.125 (2, 12)						h/h F vs. s/s F	0.118	0.3178	-0.1998	0.05864	5	5	4.819	12
								P value	0.0433						s/h F vs. s/s F	0.2097	0.3178	-0.1082	0.05864	5	5	2.609	12
								P value summary	*
								Are SDs significantly different (P < 0.05)?	Yes
								Bartlett's test
								Bartlett's statistic (corrected)	11.42
								P value	0.0033
								P value summary	**
								Are SDs significantly different (P < 0.05)?	Yes
								ANOVA table	SS	DF	MS	F (DFn, DFd)	P value
								Treatment (between columns)	0.1	2	0.05002	F (2, 12) = 5.819	P=0.0171
								Residual (within columns)	0.1032	12	0.008596
								Total	0.2032	14
								Data summary
								Number of treatments (columns)	3
								Number of values (total)	15

## Sheet: FIG6F
	h/h M	s/h M	s/s M					Ordinary one-way ANOVA							Tukey's multiple comparisons test
Fig. 6F	0.933426	0.75313	0.882798					Table Analyzed	Fig. 6F-aCTF M
aCTF male	0.318853	0.836954	0.616174					Data sets analyzed	A-C
	0.437045	0.809139	0.547357
	0.889922	0.651917	0.279052					ANOVA summary
	0.676714	0.650711						F	0.62
								P value	0.5557
								P value summary	ns
								Significant diff. among means (P < 0.05)?	No
								R square	0.1013
								Brown-Forsythe test
								F (DFn, DFd)	2.028 (2, 11)
								P value	0.1779
								P value summary	ns
								Are SDs significantly different (P < 0.05)?	No
								Bartlett's test
								Bartlett's statistic (corrected)	4.05
								P value	0.132
								P value summary	ns
								Are SDs significantly different (P < 0.05)?	No
								ANOVA table	SS	DF	MS	F (DFn, DFd)	P value
								Treatment (between columns)	0.0573	2	0.02865	F (2, 11) = 0.6200	P=0.5557
								Residual (within columns)	0.5083	11	0.04621
								Total	0.5656	13
								Data summary
								Number of treatments (columns)	3
								Number of values (total)	14
	h/h F	s/h F	s/s F					Ordinary one-way ANOVA							Tukey's multiple comparisons test
Fig. 6F	0.243556	0.253432	0.353814					Table Analyzed	Fig. 6F-aCTF F
aCTF female	0.12024	0.305095	0.314083					Data sets analyzed	A-C
	0.17952	0.184827	0.156125
	0.143768	0.317839	0.184363					ANOVA summary
	0.267606	0.203604	0.0902826					F	0.7322
								P value	0.5012
								P value summary	ns
								Significant diff. among means (P < 0.05)?	No
								R square	0.1088
								Brown-Forsythe test
								F (DFn, DFd)	0.9670 (2, 12)
								P value	0.408
								P value summary	ns
								Are SDs significantly different (P < 0.05)?	No
								Bartlett's test
								Bartlett's statistic (corrected)	1.828
								P value	0.401
								P value summary	ns
								Are SDs significantly different (P < 0.05)?	No
								ANOVA table	SS	DF	MS	F (DFn, DFd)	P value
								Treatment (between columns)	0.009633	2	0.004817	F (2, 12) = 0.7322	P=0.5012
								Residual (within columns)	0.07894	12	0.006578
								Total	0.08857	14
								Data summary
								Number of treatments (columns)	3
								Number of values (total)	15

## Sheet: Fig6G
	h/h M	s/h M	s/s M					Ordinary one-way ANOVA							Tukey's multiple comparisons test
Fig. 6G	0.45416	0.941603	1.3653					Table Analyzed	Fig. 6G-bCTF/aCTF M						Number of families	1
bCTF/aCTF male	0.582671	0.90964	1.6944					Data sets analyzed	A-C						Number of comparisons per family	3
	0.451457	0.697987	1.476												Alpha	0.05
	0.405909	0.888989	1.39206					ANOVA summary
	0.658512	1.03709						F	66.89						Tukey's multiple comparisons test	Mean Diff.	95.00% CI of diff.	Significant?	Summary	Adjusted P Value
								P value	<0.0001						h/h M vs. s/h M	-0.3845	-0.5987 to -0.1703	Yes	**	0.0014	A-B
								P value summary	****						h/h M vs. s/s M	-0.9714	-1.199 to -0.7442	Yes	****	<0.0001	A-C
								Significant diff. among means (P < 0.05)?	Yes						s/h M vs. s/s M	-0.5869	-0.8141 to -0.3597	Yes	****	<0.0001	B-C
								R square	0.924
															Test details	Mean 1	Mean 2	Mean Diff.	SE of diff.	n1	n2	q	DF
								Brown-Forsythe test							h/h M vs. s/h M	0.5105	0.8951	-0.3845	0.07931	5	5	6.856	11
								F (DFn, DFd)	0.1081 (2, 11)						h/h M vs. s/s M	0.5105	1.482	-0.9714	0.08413	5	4	16.33	11
								P value	0.8985						s/h M vs. s/s M	0.8951	1.482	-0.5869	0.08413	5	4	9.866	11
								P value summary	ns
								Are SDs significantly different (P < 0.05)?	No
								Bartlett's test
								Bartlett's statistic (corrected)	0.3694
								P value	0.8313
								P value summary	ns
								Are SDs significantly different (P < 0.05)?	No
								ANOVA table	SS	DF	MS	F (DFn, DFd)	P value
								Treatment (between columns)	2.104	2	1.052	F (2, 11) = 66.89	P<0.0001
								Residual (within columns)	0.173	11	0.01573
								Total	2.277	13
								Data summary
								Number of treatments (columns)	3
								Number of values (total)	14
	h/h F	s/h F	s/s F					Ordinary one-way ANOVA							Tukey's multiple comparisons test
Fig. 6G	0.542363	0.882451	1.33702					Table Analyzed	Fig. 6G-bCTF/aCTF F						Number of families	1
bCTF/aCTF female	0.767606	0.698194	1.3614					Data sets analyzed	A-C						Number of comparisons per family	3
	0.594668	0.800552	1.43275												Alpha	0.05
	0.767583	0.876954	1.94833					ANOVA summary
	0.555021	0.908213	1.16901					F	24.78						Tukey's multiple comparisons test	Mean Diff.	95.00% CI of diff.	Significant?	Summary	Adjusted P Value
								P value	<0.0001						h/h F vs. s/h F	-0.1878	-0.5067 to 0.1311	No	ns	0.2948	A-B
								P value summary	****						h/h F vs. s/s F	-0.8043	-1.123 to -0.4853	Yes	****	<0.0001	A-C
								Significant diff. among means (P < 0.05)?	Yes						s/h F vs. s/s F	-0.6164	-0.9353 to -0.2975	Yes	***	0.0006	B-C
								R square	0.805
															Test details	Mean 1	Mean 2	Mean Diff.	SE of diff.	n1	n2	q	DF
								Brown-Forsythe test							h/h F vs. s/h F	0.6454	0.8333	-0.1878	0.1195	5	5	2.222	12
								F (DFn, DFd)	0.7849 (2, 12)						h/h F vs. s/s F	0.6454	1.45	-0.8043	0.1195	5	5	9.515	12
								P value	0.4783						s/h F vs. s/s F	0.8333	1.45	-0.6164	0.1195	5	5	7.293	12
								P value summary	ns
								Are SDs significantly different (P < 0.05)?	No
								Bartlett's test
								Bartlett's statistic (corrected)	6.196
								P value	0.0451
								P value summary	*
								Are SDs significantly different (P < 0.05)?	Yes
								ANOVA table	SS	DF	MS	F (DFn, DFd)	P value
								Treatment (between columns)	1.77	2	0.8851	F (2, 12) = 24.78	P<0.0001
								Residual (within columns)	0.4287	12	0.03572
								Total	2.199	14
								Data summary
								Number of treatments (columns)	3
								Number of values (total)	15
