# Supplementary material for: Opposite changes in APP processing and human Aβ levels in rats carrying either a protective or a pathogenic APP mutation
Source: eLife. 2020 Feb 5;9:e52612. doi: 10.7554/eLife.52612 (PMC7018507; doi:10.7554/eLife.52612)
Supplement: Figure 7—source data 1. [file elife-52612-fig7-data1.xlsx]

## Sheet: Fig 7B
		h/h	s/h	s/s		Ordinary one-way ANOVA							Tukey's multiple comparisons test
Fig. 7B		1.082	0.668678	0.401981		Table Analyzed	Swed Series Full length 6E10 F						Number of families	1
APP females		0.969675	0.515984	0.353305		Data sets analyzed	A-C						Number of comparisons per family	3
		1.10677	0.476279	0.413854									Alpha	0.05
		0.952121	0.423749	0.496632		ANOVA summary
		0.889441	0.516033	0.497641		F	67.62						Tukey's multiple comparisons test	Mean Diff.	95.00% CI of diff.	Significant?	Summary	Adjusted P Value
						P value	<0.0001						h/h vs. s/h	0.4799	0.3397 to 0.6200	Yes	****	<0.0001	A-B
						P value summary	****						h/h vs. s/s	0.5673	0.4272 to 0.7075	Yes	****	<0.0001	A-C
						Significant diff. among means (P < 0.05)?	Yes						s/h vs. s/s	0.08746	-0.05268 to 0.2276	No	ns	0.2579	B-C
						R squared	0.9185
													Test details	Mean 1	Mean 2	Mean Diff.	SE of diff.	n1	n2	q	DF
						Brown-Forsythe test							h/h vs. s/h	1	0.5201	0.4799	0.05253	5	5	12.92	12
						F (DFn, DFd)	0.1889 (2, 12)						h/h vs. s/s	1	0.4327	0.5673	0.05253	5	5	15.27	12
						P value	0.8303						s/h vs. s/s	0.5201	0.4327	0.08746	0.05253	5	5	2.355	12
						P value summary	ns
						Are SDs significantly different (P < 0.05)?	No
						Bartlett's test
						Bartlett's statistic (corrected)	0.6
						P value	0.7408
						P value summary	ns
						Are SDs significantly different (P < 0.05)?	No
						ANOVA table	SS	DF	MS	F (DFn, DFd)	P value
						Treatment (between columns)	0.9329	2	0.4665	F (2, 12) = 67.62	P<0.0001
						Residual (within columns)	0.08278	12	0.006898
						Total	1.016	14
						Data summary
						Number of treatments (columns)	3
						Number of values (total)	15
Fig. 7B		h/h	s/h	s/s		Table Analyzed	Swed Series Full length 6E10 M						Number of families	1
APP males		0.978137	0.812316	0.813383		Data sets analyzed	A-C						Number of comparisons per family	3
		0.894621	0.762084	0.66139									Alpha	0.05
		1.07944	0.859309	0.80709		ANOVA summary
		1.04237	1.07095	0.758425		F	5.76						Tukey's multiple comparisons test	Mean Diff.	95.00% CI of diff.	Significant?	Summary	Adjusted P Value
		1.00544	1.08265			P value	0.0194						h/h vs. s/h	0.08254	-0.09878 to 0.2639	No	ns	0.4613	A-B
						P value summary	*						h/h vs. s/s	0.2399	0.04761 to 0.4322	Yes	*	0.0159	A-C
						Significant diff. among means (P < 0.05)?	Yes						s/h vs. s/s	0.1574	-0.03492 to 0.3497	No	ns	0.1132	B-C
						R squared	0.5115
													Test details	Mean 1	Mean 2	Mean Diff.	SE of diff.	n1	n2	q	DF
						Brown-Forsythe test							h/h vs. s/h	1	0.9175	0.08254	0.06713	5	5	1.739	11
						F (DFn, DFd)	1.434 (2, 11)						h/h vs. s/s	1	0.7601	0.2399	0.0712	5	4	4.765	11
						P value	0.2796						s/h vs. s/s	0.9175	0.7601	0.1574	0.0712	5	4	3.126	11
						P value summary	ns
						Are SDs significantly different (P < 0.05)?	No
						Bartlett's test
						Bartlett's statistic (corrected)	2.709
						P value	0.258
						P value summary	ns
						Are SDs significantly different (P < 0.05)?	No
						ANOVA table	SS	DF	MS	F (DFn, DFd)	P value
						Treatment (between columns)	0.1298	2	0.06489	F (2, 11) = 5.760	P=0.0194
						Residual (within columns)	0.1239	11	0.01127
						Total	0.2537	13
						Data summary
						Number of treatments (columns)	3
						Number of values (total)	14
Fig. 7B		h/h	s/h	s/s		Table Analyzed	Swed Series bCTF 6E10 F						Number of families	1
bCTF females		0.661189	1.78769	2.99049		Data sets analyzed	A-C						Number of comparisons per family	3
		0.877919	1.48443	2.33582									Alpha	0.05
		1.13016	1.18247	2.45037		ANOVA summary
		1.07926	1.31173	3.24445		F	49.69						Tukey's multiple comparisons test	Mean Diff.	95.00% CI of diff.	Significant?	Summary	Adjusted P Value
		1.25147	1.39327	2.68075		P value	<0.0001						h/h vs. s/h	-0.4319	-0.9170 to 0.05312	No	ns	0.083	A-B
						P value summary	****						h/h vs. s/s	-1.74	-2.225 to -1.255	Yes	****	<0.0001	A-C
						Significant diff. among means (P < 0.05)?	Yes						s/h vs. s/s	-1.308	-1.793 to -0.8234	Yes	****	<0.0001	B-C
						R squared	0.8923
													Test details	Mean 1	Mean 2	Mean Diff.	SE of diff.	n1	n2	q	DF
						Brown-Forsythe test							h/h vs. s/h	1	1.432	-0.4319	0.1818	5	5	3.36	12
						F (DFn, DFd)	0.8993 (2, 12)						h/h vs. s/s	1	2.74	-1.74	0.1818	5	5	13.54	12
						P value	0.4326						s/h vs. s/s	1.432	2.74	-1.308	0.1818	5	5	10.18	12
						P value summary	ns
						Are SDs significantly different (P < 0.05)?	No
						Bartlett's test
						Bartlett's statistic (corrected)	1.256
						P value	0.5335
						P value summary	ns
						Are SDs significantly different (P < 0.05)?	No
						ANOVA table	SS	DF	MS	F (DFn, DFd)	P value
						Treatment (between columns)	8.213	2	4.106	F (2, 12) = 49.69	P<0.0001
						Residual (within columns)	0.9916	12	0.08264
						Total	9.204	14
						Data summary
						Number of treatments (columns)	3
						Number of values (total)	15
Fig. 7B		h/h	s/h	s/s		Table Analyzed	Swed Series bCTF 6E10 M						Number of families	1
bCTF males		1.19211	1.96716	3.42073		Data sets analyzed	A-C						Number of comparisons per family	3
		0.914213	2.38962	2.47388									Alpha	0.05
		0.827516	1.50121	4.41805		ANOVA summary
		0.977607	2.27754	4.04765		F	28.55						Tukey's multiple comparisons test	Mean Diff.	95.00% CI of diff.	Significant?	Summary	Adjusted P Value
		1.08855	2.46176			P value	<0.0001						h/h vs. s/h	-1.119	-1.992 to -0.2466	Yes	*	0.0135	A-B
						P value summary	****						h/h vs. s/s	-2.59	-3.516 to -1.664	Yes	****	<0.0001	A-C
						Significant diff. among means (P < 0.05)?	Yes						s/h vs. s/s	-1.471	-2.396 to -0.5448	Yes	**	0.0034	B-C
						R squared	0.8385
													Test details	Mean 1	Mean 2	Mean Diff.	SE of diff.	n1	n2	q	DF
						Brown-Forsythe test							h/h vs. s/h	1	2.119	-1.119	0.3232	5	5	4.899	11
						F (DFn, DFd)	3.619 (2, 11)						h/h vs. s/s	1	3.59	-2.59	0.3428	5	4	10.69	11
						P value	0.062						s/h vs. s/s	2.119	3.59	-1.471	0.3428	5	4	6.067	11
						P value summary	ns
						Are SDs significantly different (P < 0.05)?	No
						Bartlett's test
						Bartlett's statistic (corrected)	8.176
						P value	0.0168
						P value summary	*
						Are SDs significantly different (P < 0.05)?	Yes
						ANOVA table	SS	DF	MS	F (DFn, DFd)	P value
						Treatment (between columns)	14.91	2	7.456	F (2, 11) = 28.55	P<0.0001
						Residual (within columns)	2.872	11	0.2611
						Total	17.78	13
						Data summary
						Number of treatments (columns)	3
						Number of values (total)	14

## Sheet: Fig 7D
Fig 7D		h/h	p/p			Unpairedt t test
bCTF females		0.859533	0.810987		Table Analyzed	Prot Series bCTF F
		1.20627	0.732127
		0.985257	0.60554		Column B	p/p
		0.909047	0.652019		vs.	vs.
		1.0399	0.592409		Column A	h/h
					Unpaired t test
					P value	0.0023
					P value summary	**
					Significantly different (P < 0.05)?	Yes
					One- or two-tailed P value?	Two-tailed
					t, df	t=4.410, df=8
					How big is the difference?
					Mean of column A	1
					Mean of column B	0.6786
					Difference between means (B - A) ± SEM	-0.3214 ± 0.07288
					95% confidence interval	-0.4894 to -0.1533
					R squared (eta squared)	0.7085
					F test to compare variances
					F, DFn, Dfd	2.137, 4, 4
					P value	0.4802
					P value summary	ns
					Significantly different (P < 0.05)?	No
					Data analyzed
					Sample size, column A	5
					Sample size, column B	5
Fig 7D		h/h	p/p		Table Analyzed	Prot Series bCTF M
bCTF males		0.964036	0.533121
		0.783373	0.791626		Column B	p/p
		0.849855	0.598958		vs.	vs.
		0.783976	0.636347		Column A	h/h
		1.61876	0.598667
					Unpaired t test
					P value	0.0549
					P value summary	ns
					Significantly different (P < 0.05)?	No
					One- or two-tailed P value?	Two-tailed
					t, df	t=2.246, df=8
					How big is the difference?
					Mean of column A	1
					Mean of column B	0.6317
					Difference between means (B - A) ± SEM	-0.3683 ± 0.1640
					95% confidence interval	-0.7464 to 0.009877
					R squared (eta squared)	0.3867
					F test to compare variances
					F, DFn, Dfd	13.35, 4, 4
					P value	0.0278
					P value summary	*
					Significantly different (P < 0.05)?	Yes
					Data analyzed
					Sample size, column A	5
					Sample size, column B	5
Fig 7D		h/h	p/p		Table Analyzed	Prot Series bCTF
bCTF females+ males		0.859533	0.810987
		1.20627	0.732127		Column B	p/p
		0.985257	0.60554		vs.	vs.
		0.909047	0.652019		Column A	h/h
		1.0399	0.592409
		0.964036	0.533121		Unpaired t test
		0.783373	0.791626		P value	0.0007
		0.849855	0.598958		P value summary	***
		0.783976	0.636347		Significantly different (P < 0.05)?	Yes
		1.61876	0.598667		One- or two-tailed P value?	Two-tailed
					t, df	t=4.059, df=18
					How big is the difference?
					Mean of column A	1
					Mean of column B	0.6552
					Difference between means (B - A) ± SEM	-0.3448 ± 0.08495
					95% confidence interval	-0.5233 to -0.1663
					R squared (eta squared)	0.4779
					F test to compare variances
					F, DFn, Dfd	7.453, 9, 9
					P value	0.0063
					P value summary	**
					Significantly different (P < 0.05)?	Yes
					Data analyzed
					Sample size, column A	10
					Sample size, column B	10

## Sheet: Fig 7E
Fig 7E		h/h	p/p			Unpairedt t test
APP females		0.905952	1.09472		Table Analyzed	Prot Series APP F
		1.0994	0.936129
		1.0542	0.864849		Column B	p/p
		0.932842	0.857906		vs.	vs.
		1.0076	0.848007		Column A	h/h
					Unpaired t test
					P value	0.2123
					P value summary	ns
					Significantly different (P < 0.05)?	No
					One- or two-tailed P value?	Two-tailed
					t, df	t=1.356, df=8
					How big is the difference?
					Mean of column A	1
					Mean of column B	0.9203
					Difference between means (B - A) ± SEM	-0.07968 ± 0.05878
					95% confidence interval	-0.2152 to 0.05587
					R squared (eta squared)	0.1868
					F test to compare variances
					F, DFn, Dfd	1.634, 4, 4
					P value	0.6458
					P value summary	ns
					Significantly different (P < 0.05)?	No
					Data analyzed
					Sample size, column A	5
					Sample size, column B	5
Fig 7E		h/h	p/p		Table Analyzed	Prot Series APP M
APP males		1.18521	0.999899
		0.744242	1.08628		Column B	p/p
		1.03666	0.878915		vs.	vs.
		0.855431	0.796455		Column A	h/h
		1.17845	0.86513
					Unpaired t test
					P value	0.4846
					P value summary	ns
					Significantly different (P < 0.05)?	No
					One- or two-tailed P value?	Two-tailed
					t, df	t=0.7327, df=8
					How big is the difference?
					Mean of column A	1
					Mean of column B	0.9253
					Difference between means (B - A) ± SEM	-0.07466 ± 0.1019
					95% confidence interval	-0.3096 to 0.1603
					R squared (eta squared)	0.06289
					F test to compare variances
					F, DFn, Dfd	2.856, 4, 4
					P value	0.3338
					P value summary	ns
					Significantly different (P < 0.05)?	No
					Data analyzed
					Sample size, column A	5
					Sample size, column B	5
Fig 7E		h/h	p/p		Table Analyzed	Prot Series APP
APP females+ males		0.905952	1.09472
		1.0994	0.936129		Column B	p/p
		1.0542	0.864849		vs.	vs.
		0.932842	0.857906		Column A	h/h
		1.0076	0.848007
		1.18521	0.999899		Unpaired t test
		0.744242	1.08628		P value	0.181
		1.03666	0.878915		P value summary	ns
		0.855431	0.796455		Significantly different (P < 0.05)?	No
		1.17845	0.86513		One- or two-tailed P value?	Two-tailed
					t, df	t=1.391, df=18
					How big is the difference?
					Mean of column A	1
					Mean of column B	0.9228
					Difference between means (B - A) ± SEM	-0.07717 ± 0.05546
					95% confidence interval	-0.1937 to 0.03935
					R squared (eta squared)	0.09712
					F test to compare variances
					F, DFn, Dfd	1.860, 9, 9
					P value	0.3688
					P value summary	ns
					Significantly different (P < 0.05)?	No
					Data analyzed
					Sample size, column A	10
					Sample size, column B	10

## Sheet: Fig 7F
Fig 7F		h/h	p/p			Unpairedt t test
bCTF/APP females		0.951215	0.742729		Table Analyzed	Prot Series bCTF/APP F
		1.10004	0.7841
		0.937018	0.701978		Column B	p/p
		0.977011	0.761978		vs.	vs.
		1.03472	0.700396		Column A	h/h
					Unpaired t test
					P value	<0.0001
					P value summary	****
					Significantly different (P < 0.05)?	Yes
					One- or two-tailed P value?	Two-tailed
					t, df	t=7.633, df=8
					How big is the difference?
					Mean of column A	1
					Mean of column B	0.7382
					Difference between means (B - A) ± SEM	-0.2618 ± 0.03429
					95% confidence interval	-0.3408 to -0.1827
					R squared (eta squared)	0.8793
					F test to compare variances
					F, DFn, Dfd	3.329, 4, 4
					P value	0.2709
					P value summary	ns
					Significantly different (P < 0.05)?	No
					Data analyzed
					Sample size, column A	5
					Sample size, column B	5
Fig 7F		h/h	p/p		Table Analyzed	Prot Series bCTF/APP M
bCTF/APP males		0.817331	0.535761
		1.05768	0.732286		Column B	p/p
		0.823776	0.68478		vs.	vs.
		0.920914	0.802848		Column A	h/h
		1.3803	0.695353
					Unpaired t test
					P value	0.0257
					P value summary	*
					Significantly different (P < 0.05)?	Yes
					One- or two-tailed P value?	Two-tailed
					t, df	t=2.733, df=8
					How big is the difference?
					Mean of column A	1
					Mean of column B	0.6902
					Difference between means (B - A) ± SEM	-0.3098 ± 0.1134
					95% confidence interval	-0.5712 to -0.04839
					R squared (eta squared)	0.4828
					F test to compare variances
					F, DFn, Dfd	5.698, 4, 4
					P value	0.1204
					P value summary	ns
					Significantly different (P < 0.05)?	No
					Data analyzed
					Sample size, column A	5
					Sample size, column B	5
Fig 7F		h/h	p/p		bCTF/GAPDH males	Prot Series bCTF/APP
bCTF/APP females+ males		0.951215	0.742729
		1.10004	0.7841		Column B	p/p
		0.937018	0.701978		vs.	vs.
		0.977011	0.761978		Column A	h/h
		1.03472	0.700396
		0.817331	0.535761		Unpaired t test
		1.05768	0.732286		P value	<0.0001
		0.823776	0.68478		P value summary	****
		0.920914	0.802848		Significantly different (P < 0.05)?	Yes
		1.3803	0.695353		One- or two-tailed P value?	Two-tailed
					t, df	t=5.067, df=18
					How big is the difference?
					Mean of column A	1
					Mean of column B	0.7142
					Difference between means (B - A) ± SEM	-0.2858 ± 0.05640
					95% confidence interval	-0.4043 to -0.1673
					R squared (eta squared)	0.5879
					F test to compare variances
					F, DFn, Dfd	4.775, 9, 9
					P value	0.0291
					P value summary	*
					Significantly different (P < 0.05)?	Yes
					Data analyzed
					Sample size, column A	10
					Sample size, column B	10

## Sheet: Fig 7G
Fig 7G		h/h	p/p			Unpairedt t test
bCTF/GAPDH females		0.977306	0.729175		Table Analyzed	Prot Series bCTF/GAPDH F
		1.11367	0.551587
		0.881957	0.459882		Column B	p/p
		0.921059	0.558741		vs.	vs.
		1.10601	0.500541		Column A	h/h
					Unpaired t test
					P value	0.0002
					P value summary	***
					Significantly different (P < 0.05)?	Yes
					One- or two-tailed P value?	Two-tailed
					t, df	t=6.668, df=8
					How big is the difference?
					Mean of column A	1
					Mean of column B	0.56
					Difference between means (B - A) ± SEM	-0.4400 ± 0.06599
					95% confidence interval	-0.5922 to -0.2878
					R squared (eta squared)	0.8475
					F test to compare variances
					F, DFn, Dfd	1.061, 4, 4
					P value	0.9554
					P value summary	ns
					Significantly different (P < 0.05)?	No
					Data analyzed
					Sample size, column A	5
					Sample size, column B	5
Fig 7G		h/h	p/p		Table Analyzed	Prot Series bCTF/GAPDH M
bCTF/GAPDH males		1.16333	0.456491
		0.752593	0.494813		Column B	p/p
		0.841241	0.497752		vs.	vs.
		0.74086	0.403554		Column A	h/h
		1.50198	0.387052
					Unpaired t test
					P value	0.0059
					P value summary	**
					Significantly different (P < 0.05)?	Yes
					One- or two-tailed P value?	Two-tailed
					t, df	t=3.711, df=8
					How big is the difference?
					Mean of column A	1
					Mean of column B	0.4479
					Difference between means (B - A) ± SEM	-0.5521 ± 0.1488
					95% confidence interval	-0.8951 to -0.2090
					R squared (eta squared)	0.6325
					F test to compare variances
					F, DFn, Dfd	41.44, 4, 4
					P value	0.0033
					P value summary	**
					Significantly different (P < 0.05)?	Yes
					Data analyzed
					Sample size, column A	5
					Sample size, column B	5
Fig 7G		h/h	p/p		Table Analyzed	Prot Series bCTF/GAPDH
bCTF/GAPDH females+ males		0.977306	0.729175
		1.11367	0.551587		Column B	p/p
		0.881957	0.459882		vs.	vs.
		0.921059	0.558741		Column A	h/h
		1.10601	0.500541
		1.16333	0.456491		Unpaired t test
		0.752593	0.494813		P value	<0.0001
		0.841241	0.497752		P value summary	****
		0.74086	0.403554		Significantly different (P < 0.05)?	Yes
		1.50198	0.387052		One- or two-tailed P value?	Two-tailed
					t, df	t=6.282, df=18
					How big is the difference?
					Mean of column A	1
					Mean of column B	0.504
					Difference between means (B - A) ± SEM	-0.4960 ± 0.07896
					95% confidence interval	-0.6619 to -0.3302
					R squared (eta squared)	0.6868
					F test to compare variances
					F, DFn, Dfd	5.675, 9, 9
					P value	0.0164
					P value summary	*
					Significantly different (P < 0.05)?	Yes
					Data analyzed
					Sample size, column A	10
					Sample size, column B	10

## Sheet: Fig 7H
Fig 7H		h/h	p/p			Unpairedt t test
bCTF/Ponc females		0.852316	0.54397		Table Analyzed	Prot Series bCTF/Ponc F
		0.886816	0.436798
		1.11287	0.585503		Column B	p/p
		0.739697	0.588187		vs.	vs.
		1.4083	0.672283		Column A	h/h
					Unpaired t test
					P value	0.0083
					P value summary	**
					Significantly different (P < 0.05)?	Yes
					One- or two-tailed P value?	Two-tailed
					t, df	t=3.485, df=8
					How big is the difference?
					Mean of column A	1
					Mean of column B	0.5653
					Difference between means (B - A) ± SEM	-0.4347 ± 0.1247
					95% confidence interval	-0.7223 to -0.1470
					R squared (eta squared)	0.6028
					F test to compare variances
					F, DFn, Dfd	9.604, 4, 4
					P value	0.05
					P value summary	ns
					Significantly different (P < 0.05)?	No
					Data analyzed
					Sample size, column A	5
					Sample size, column B	5
Fig 7H		h/h	p/p		Table Analyzed	Prot Series bCTF/Ponc M
bCTF/Ponc males		0.921882	0.398916
		0.771383	0.583955		Column B	p/p
		0.874406	0.640168		vs.	vs.
		0.589292	0.65712		Column A	h/h
		1.84304	0.54993
					Unpaired t test
					P value	0.0877
					P value summary	ns
					Significantly different (P < 0.05)?	No
					One- or two-tailed P value?	Two-tailed
					t, df	t=1.945, df=8
					How big is the difference?
					Mean of column A	1
					Mean of column B	0.566
					Difference between means (B - A) ± SEM	-0.4340 ± 0.2231
					95% confidence interval	-0.9485 to 0.08058
					R squared (eta squared)	0.321
					F test to compare variances
					F, DFn, Dfd	22.54, 4, 4
					P value	0.0105
					P value summary	*
					Significantly different (P < 0.05)?	Yes
					Data analyzed
					Sample size, column A	5
					Sample size, column B	5
Fig 7H		h/h	p/p		Table Analyzed	Prot Series bCTF/Ponc
bCTF/Ponc females+ males		0.852316	0.54397
		0.886816	0.436798		Column B	p/p
		1.11287	0.585503		vs.	vs.
		0.739697	0.588187		Column A	h/h
		1.4083	0.672283
		0.921882	0.398916		Unpaired t test
		0.771383	0.583955		P value	0.002
		0.874406	0.640168		P value summary	**
		0.589292	0.65712		Significantly different (P < 0.05)?	Yes
		1.84304	0.54993		One- or two-tailed P value?	Two-tailed
					t, df	t=3.604, df=18
					How big is the difference?
					Mean of column A	1
					Mean of column B	0.5657
					Difference between means (B - A) ± SEM	-0.4343 ± 0.1205
					95% confidence interval	-0.6875 to -0.1811
					R squared (eta squared)	0.4191
					F test to compare variances
					F, DFn, Dfd	17.24, 9, 9
					P value	0.0002
					P value summary	***
					Significantly different (P < 0.05)?	Yes
					Data analyzed
					Sample size, column A	10
					Sample size, column B	10
