# Supplementary material for: Opposite changes in APP processing and human Aβ levels in rats carrying either a protective or a pathogenic APP mutation
Source: eLife. 2020 Feb 5;9:e52612. doi: 10.7554/eLife.52612 (PMC7018507; doi:10.7554/eLife.52612)
Supplement: Figure 8—source data 1. [file elife-52612-fig8-data1.xlsx]

## Sheet: FIG8A
	h/h M	p/h M	s/h M	s/p M	h/h F	p/h F	s/h F	s/p F		Ordinary one-way ANOVA
Fig. 8A	0	0	0	0	0	0	0	273.228		Table Analyzed	Fig. 8A-Ab38+p22
Ab38+p22	0	0	0	0	0	0	0	0		Data sets analyzed	A-H
	0	0	0	0	0	0	0	0
	0	0	0	315.14	0	0	0	0		ANOVA summary
	0	0	0	0	0	0	0	0		F	0.8586
										P value	0.5488
										P value summary	ns
										Significant diff. among means (P < 0.05)?	No
										R square	0.1581
										Brown-Forsythe test
										F (DFn, DFd)	0.8586 (7, 32)
										P value	0.5488
										P value summary	ns
										Are SDs significantly different (P < 0.05)?	No
										Bartlett's test
										Bartlett's statistic (corrected)
										P value
										P value summary
										Are SDs significantly different (P < 0.05)?
										ANOVA table	SS	DF	MS	F (DFn, DFd)	P value
										Treatment (between columns)	26139	7	3734	F (7, 32) = 0.8586	P=0.5488
										Residual (within columns)	139173	32	4349
										Total	165312	39
										Data summary
										Number of treatments (columns)	8
										Number of values (total)	40
	h/h M	p/h M	s/h M	s/p M	h/h F	p/h F	s/h F	s/p F		Ordinary one-way ANOVA							Tukey's multiple comparisons test
Fig. 8A	0	0	1641.81	1195.97	0	0	941.166	1150.52		Table Analyzed	Fig. 8A-Ab38						Number of families	1
Ab38	0	0	652.783	906.795	0	0	3872.68	958.105		Data sets analyzed	A-H						Number of comparisons per family	28
	0	0	966.515	732.817	0	0	835.889	370.103									Alpha	0.05
	0	0	1080.5	799.225	0	0	693.41	631.964		ANOVA summary
	0	0	844.922	742.494	0	0	1411	652.783		F	7.31						Tukey's multiple comparisons test	Mean Diff.	95.00% CI of diff.	Significant?	Summary	Adjusted P Value
										P value	<0.0001						h/h M vs. p/h M	0	-1031 to 1031	No	ns	>0.9999	A-B
										P value summary	****						h/h M vs. s/h M	-1037	-2068 to -6.272	Yes	*	0.0478	A-C
										Significant diff. among means (P < 0.05)?	Yes						h/h M vs. s/p M	-875.5	-1906 to 155.6	No	ns	0.1443	A-D
										R square	0.6152						h/h M vs. h/h F	0	-1031 to 1031	No	ns	>0.9999	A-E
																	h/h M vs. p/h F	0	-1031 to 1031	No	ns	>0.9999	A-F
										Brown-Forsythe test							h/h M vs. s/h F	-1551	-2582 to -519.8	Yes	***	0.0007	A-G
										F (DFn, DFd)	1.598 (7, 32)						h/h M vs. s/p F	-752.7	-1784 to 278.3	No	ns	0.2921	A-H
										P value	0.1717						p/h M vs. s/h M	-1037	-2068 to -6.272	Yes	*	0.0478	B-C
										P value summary	ns						p/h M vs. s/p M	-875.5	-1906 to 155.6	No	ns	0.1443	B-D
										Are SDs significantly different (P < 0.05)?	No						p/h M vs. h/h F	0	-1031 to 1031	No	ns	>0.9999	B-E
																	p/h M vs. p/h F	0	-1031 to 1031	No	ns	>0.9999	B-F
										Bartlett's test							p/h M vs. s/h F	-1551	-2582 to -519.8	Yes	***	0.0007	B-G
										Bartlett's statistic (corrected)							p/h M vs. s/p F	-752.7	-1784 to 278.3	No	ns	0.2921	B-H
										P value							s/h M vs. s/p M	161.8	-869.2 to 1193	No	ns	0.9995	C-D
										P value summary							s/h M vs. h/h F	1037	6.272 to 2068	Yes	*	0.0478	C-E
										Are SDs significantly different (P < 0.05)?							s/h M vs. p/h F	1037	6.272 to 2068	Yes	*	0.0478	C-F
																	s/h M vs. s/h F	-513.5	-1545 to 517.5	No	ns	0.7391	C-G
										ANOVA table	SS	DF	MS	F (DFn, DFd)	P value		s/h M vs. s/p F	284.6	-746.4 to 1316	No	ns	0.9845	C-H
										Treatment (between columns)	12959603	7	1851372	F (7, 32) = 7.310	P<0.0001		s/p M vs. h/h F	875.5	-155.6 to 1906	No	ns	0.1443	D-E
										Residual (within columns)	8104661	32	253271				s/p M vs. p/h F	875.5	-155.6 to 1906	No	ns	0.1443	D-F
										Total	21064264	39					s/p M vs. s/h F	-675.4	-1706 to 355.7	No	ns	0.4232	D-G
																	s/p M vs. s/p F	122.8	-908.3 to 1154	No	ns	>0.9999	D-H
										Data summary							h/h F vs. p/h F	0	-1031 to 1031	No	ns	>0.9999	E-F
										Number of treatments (columns)	8						h/h F vs. s/h F	-1551	-2582 to -519.8	Yes	***	0.0007	E-G
										Number of values (total)	40						h/h F vs. s/p F	-752.7	-1784 to 278.3	No	ns	0.2921	E-H
																	p/h F vs. s/h F	-1551	-2582 to -519.8	Yes	***	0.0007	F-G
																	p/h F vs. s/p F	-752.7	-1784 to 278.3	No	ns	0.2921	F-H
																	s/h F vs. s/p F	798.1	-232.9 to 1829	No	ns	0.2285	G-H
																	Test details	Mean 1	Mean 2	Mean Diff.	SE of diff.	n1	n2	q	DF
																	h/h M vs. p/h M	0	0	0	318.3	5	5	0	32
																	h/h M vs. s/h M	0	1037	-1037	318.3	5	5	4.609	32
																	h/h M vs. s/p M	0	875.5	-875.5	318.3	5	5	3.89	32
																	h/h M vs. h/h F	0	0	0	318.3	5	5	0	32
																	h/h M vs. p/h F	0	0	0	318.3	5	5	0	32
																	h/h M vs. s/h F	0	1551	-1551	318.3	5	5	6.891	32
																	h/h M vs. s/p F	0	752.7	-752.7	318.3	5	5	3.344	32
																	p/h M vs. s/h M	0	1037	-1037	318.3	5	5	4.609	32
																	p/h M vs. s/p M	0	875.5	-875.5	318.3	5	5	3.89	32
																	p/h M vs. h/h F	0	0	0	318.3	5	5	0	32
																	p/h M vs. p/h F	0	0	0	318.3	5	5	0	32
																	p/h M vs. s/h F	0	1551	-1551	318.3	5	5	6.891	32
																	p/h M vs. s/p F	0	752.7	-752.7	318.3	5	5	3.344	32
																	s/h M vs. s/p M	1037	875.5	161.8	318.3	5	5	0.7191	32
																	s/h M vs. h/h F	1037	0	1037	318.3	5	5	4.609	32
																	s/h M vs. p/h F	1037	0	1037	318.3	5	5	4.609	32
																	s/h M vs. s/h F	1037	1551	-513.5	318.3	5	5	2.282	32
																	s/h M vs. s/p F	1037	752.7	284.6	318.3	5	5	1.265	32
																	s/p M vs. h/h F	875.5	0	875.5	318.3	5	5	3.89	32
																	s/p M vs. p/h F	875.5	0	875.5	318.3	5	5	3.89	32
																	s/p M vs. s/h F	875.5	1551	-675.4	318.3	5	5	3.001	32
																	s/p M vs. s/p F	875.5	752.7	122.8	318.3	5	5	0.5455	32
																	h/h F vs. p/h F	0	0	0	318.3	5	5	0	32
																	h/h F vs. s/h F	0	1551	-1551	318.3	5	5	6.891	32
																	h/h F vs. s/p F	0	752.7	-752.7	318.3	5	5	3.344	32
																	p/h F vs. s/h F	0	1551	-1551	318.3	5	5	6.891	32
																	p/h F vs. s/p F	0	752.7	-752.7	318.3	5	5	3.344	32
																	s/h F vs. s/p F	1551	752.7	798.1	318.3	5	5	3.546	32

## Sheet: FIG8B
	h/h M	p/h M	s/h M	s/p M	h/h F	p/h F	s/h F	s/p F		Ordinary one-way ANOVA							Tukey's multiple comparisons test
Fig. 8B	2063.41	1284.47	5133.09	5101.82	1479.02	1492.13	4563.46	4673.78		Table Analyzed	Fig. 8B-Ab40+p24						Number of families	1
Ab40+p24	1824.63	1452.45	4440.09	4681.05	1505.18	1269.21	5277.84	4398.46		Data sets analyzed	A-H						Number of comparisons per family	28
	2249.61	1683.21	4795.18	4055.98	1809.52	1476.51	4577.54	3533.29									Alpha	0.05
	1678.27	1723.01	4952.5	4445.23	2253.22	1212.89	4926.97	3767.46		ANOVA summary
	1530.64	1513.64	4743.03	3718.72	1471.18	1019.22	5126.23	3822.21		F	107.2						Tukey's multiple comparisons test	Mean Diff.	95.00% CI of diff.	Significant?	Summary	Adjusted P Value
										P value	<0.0001						h/h M vs. p/h M	338	-369.7 to 1046	No	ns	0.7766	A-B
										P value summary	****						h/h M vs. s/h M	-2943	-3651 to -2236	Yes	****	<0.0001	A-C
										Significant diff. among means (P < 0.05)?	Yes						h/h M vs. s/p M	-2531	-3239 to -1824	Yes	****	<0.0001	A-D
										R square	0.9591						h/h M vs. h/h F	165.7	-542.0 to 873.3	No	ns	0.9941	A-E
																	h/h M vs. p/h F	575.3	-132.3 to 1283	No	ns	0.1811	A-F
										Brown-Forsythe test							h/h M vs. s/h F	-3025	-3733 to -2317	Yes	****	<0.0001	A-G
										F (DFn, DFd)	0.8650 (7, 32)						h/h M vs. s/p F	-2170	-2877 to -1462	Yes	****	<0.0001	A-H
										P value	0.544						p/h M vs. s/h M	-3281	-3989 to -2574	Yes	****	<0.0001	B-C
										P value summary	ns						p/h M vs. s/p M	-2869	-3577 to -2162	Yes	****	<0.0001	B-D
										Are SDs significantly different (P < 0.05)?	No						p/h M vs. h/h F	-172.3	-879.9 to 535.4	No	ns	0.9926	B-E
																	p/h M vs. p/h F	237.4	-470.3 to 945.0	No	ns	0.9551	B-F
										Bartlett's test							p/h M vs. s/h F	-3363	-4071 to -2655	Yes	****	<0.0001	B-G
										Bartlett's statistic (corrected)	7.47						p/h M vs. s/p F	-2508	-3215 to -1800	Yes	****	<0.0001	B-H
										P value	0.3817						s/h M vs. s/p M	412.2	-295.4 to 1120	No	ns	0.5691	C-D
										P value summary	ns						s/h M vs. h/h F	3109	2402 to 3817	Yes	****	<0.0001	C-E
										Are SDs significantly different (P < 0.05)?	No						s/h M vs. p/h F	3519	2811 to 4226	Yes	****	<0.0001	C-F
																	s/h M vs. s/h F	-81.63	-789.3 to 626.0	No	ns	>0.9999	C-G
										ANOVA table	SS	DF	MS	F (DFn, DFd)	P value		s/h M vs. s/p F	773.7	66.10 to 1481	Yes	*	0.0242	C-H
										Treatment (between columns)	89527007	7	12789572	F (7, 32) = 107.2	P<0.0001		s/p M vs. h/h F	2697	1989 to 3405	Yes	****	<0.0001	D-E
										Residual (within columns)	3817821	32	119307				s/p M vs. p/h F	3107	2399 to 3814	Yes	****	<0.0001	D-F
										Total	93344827	39					s/p M vs. s/h F	-493.8	-1201 to 213.8	No	ns	0.3451	D-G
																	s/p M vs. s/p F	361.5	-346.1 to 1069	No	ns	0.7145	D-H
										Model comparison	SS	DF	Probability it is correct				h/h F vs. p/h F	409.6	-298.0 to 1117	No	ns	0.5766	E-F
										Null H. All population means identical	93344827	39	0%				h/h F vs. s/h F	-3191	-3898 to -2483	Yes	****	<0.0001	E-G
										Alternative H: Distinct population means	3817821	32	100%				h/h F vs. s/p F	-2335	-3043 to -1628	Yes	****	<0.0001	E-H
										Ratio of probabilities			0				p/h F vs. s/h F	-3600	-4308 to -2893	Yes	****	<0.0001	F-G
										Difference in AICc			108.2				p/h F vs. s/p F	-2745	-3453 to -2037	Yes	****	<0.0001	F-H
																	s/h F vs. s/p F	855.4	147.7 to 1563	Yes	**	0.0093	G-H
										Data summary
										Number of treatments (columns)	8						Test details	Mean 1	Mean 2	Mean Diff.	SE of diff.	n1	n2	q	DF
										Number of values (total)	40						h/h M vs. p/h M	1869	1531	338	218.5	5	5	2.188	32
																	h/h M vs. s/h M	1869	4813	-2943	218.5	5	5	19.06	32
																	h/h M vs. s/p M	1869	4401	-2531	218.5	5	5	16.39	32
																	h/h M vs. h/h F	1869	1704	165.7	218.5	5	5	1.073	32
																	h/h M vs. p/h F	1869	1294	575.3	218.5	5	5	3.724	32
																	h/h M vs. s/h F	1869	4894	-3025	218.5	5	5	19.58	32
																	h/h M vs. s/p F	1869	4039	-2170	218.5	5	5	14.05	32
																	p/h M vs. s/h M	1531	4813	-3281	218.5	5	5	21.24	32
																	p/h M vs. s/p M	1531	4401	-2869	218.5	5	5	18.57	32
																	p/h M vs. h/h F	1531	1704	-172.3	218.5	5	5	1.115	32
																	p/h M vs. p/h F	1531	1294	237.4	218.5	5	5	1.537	32
																	p/h M vs. s/h F	1531	4894	-3363	218.5	5	5	21.77	32
																	p/h M vs. s/p F	1531	4039	-2508	218.5	5	5	16.23	32
																	s/h M vs. s/p M	4813	4401	412.2	218.5	5	5	2.669	32
																	s/h M vs. h/h F	4813	1704	3109	218.5	5	5	20.13	32
																	s/h M vs. p/h F	4813	1294	3519	218.5	5	5	22.78	32
																	s/h M vs. s/h F	4813	4894	-81.63	218.5	5	5	0.5285	32
																	s/h M vs. s/p F	4813	4039	773.7	218.5	5	5	5.009	32
																	s/p M vs. h/h F	4401	1704	2697	218.5	5	5	17.46	32
																	s/p M vs. p/h F	4401	1294	3107	218.5	5	5	20.11	32
																	s/p M vs. s/h F	4401	4894	-493.8	218.5	5	5	3.197	32
																	s/p M vs. s/p F	4401	4039	361.5	218.5	5	5	2.34	32
																	h/h F vs. p/h F	1704	1294	409.6	218.5	5	5	2.652	32
																	h/h F vs. s/h F	1704	4894	-3191	218.5	5	5	20.66	32
																	h/h F vs. s/p F	1704	4039	-2335	218.5	5	5	15.12	32
																	p/h F vs. s/h F	1294	4894	-3600	218.5	5	5	23.31	32
																	p/h F vs. s/p F	1294	4039	-2745	218.5	5	5	17.77	32
																	s/h F vs. s/p F	4894	4039	855.4	218.5	5	5	5.537	32
	h/h M	p/h M	s/h M	s/p M	h/h F	p/h F	s/h F	s/p F		Ordinary one-way ANOVA							Tukey's multiple comparisons test
Fig. 8B	1805.06	1080.46	3866.41	4516.78	1270.17	1210.57	4192.85	4253.52		Table Analyzed	Fig. 8B-Ab40						Number of families	1
Ab40	1581.79	1295.69	4128	4055.02	1386.83	1052.1	4422.75	3727.79		Data sets analyzed	A-H						Number of comparisons per family	28
	1867.99	1364.65	4329.15	3394.01	1595.66	1238.91	4005.69	2990.34									Alpha	0.05
	1653.19	707.771	4776.08	3707.07	1867.99	985.608	3650.79	3289.76		ANOVA summary
	1441.92	1264.83	4283.81	3289.22	1273.5	921.023	4097.79	3578.29		F	92.87						Tukey's multiple comparisons test	Mean Diff.	95.00% CI of diff.	Significant?	Summary	Adjusted P Value
										P value	<0.0001						h/h M vs. p/h M	527.3	-142.1 to 1197	No	ns	0.2111	A-B
										P value summary	****						h/h M vs. s/h M	-2607	-3276 to -1937	Yes	****	<0.0001	A-C
										Significant diff. among means (P < 0.05)?	Yes						h/h M vs. s/p M	-2122	-2792 to -1453	Yes	****	<0.0001	A-D
										R square	0.9531						h/h M vs. h/h F	191.2	-478.3 to 860.6	No	ns	0.9812	A-E
																	h/h M vs. p/h F	588.3	-81.11 to 1258	No	ns	0.1186	A-F
										Brown-Forsythe test							h/h M vs. s/h F	-2404	-3073 to -1735	Yes	****	<0.0001	A-G
										F (DFn, DFd)	1.050 (7, 32)						h/h M vs. s/p F	-1898	-2567 to -1228	Yes	****	<0.0001	A-H
										P value	0.4175						p/h M vs. s/h M	-3134	-3803 to -2465	Yes	****	<0.0001	B-C
										P value summary	ns						p/h M vs. s/p M	-2650	-3319 to -1980	Yes	****	<0.0001	B-D
										Are SDs significantly different (P < 0.05)?	No						p/h M vs. h/h F	-336.1	-1006 to 333.3	No	ns	0.7314	B-E
																	p/h M vs. p/h F	61.04	-608.4 to 730.5	No	ns	>0.9999	B-F
										Bartlett's test							p/h M vs. s/h F	-2931	-3601 to -2262	Yes	****	<0.0001	B-G
										Bartlett's statistic (corrected)	9.349						p/h M vs. s/p F	-2425	-3095 to -1756	Yes	****	<0.0001	B-H
										P value	0.2286						s/h M vs. s/p M	484.3	-185.2 to 1154	No	ns	0.3027	C-D
										P value summary	ns						s/h M vs. h/h F	2798	2128 to 3467	Yes	****	<0.0001	C-E
										Are SDs significantly different (P < 0.05)?	No						s/h M vs. p/h F	3195	2526 to 3865	Yes	****	<0.0001	C-F
																	s/h M vs. s/h F	202.7	-466.7 to 872.2	No	ns	0.974	C-G
										ANOVA table	SS	DF	MS	F (DFn, DFd)	P value		s/h M vs. s/p F	708.8	39.29 to 1378	Yes	*	0.0318	C-H
										Treatment (between columns)	69418529	7	9916933	F (7, 32) = 92.87	P<0.0001		s/p M vs. h/h F	2314	1644 to 2983	Yes	****	<0.0001	D-E
										Residual (within columns)	3416933	32	106779				s/p M vs. p/h F	2711	2041 to 3380	Yes	****	<0.0001	D-F
										Total	72835462	39					s/p M vs. s/h F	-281.6	-951.0 to 387.9	No	ns	0.8671	D-G
																	s/p M vs. s/p F	224.5	-445.0 to 893.9	No	ns	0.9552	D-H
										Data summary							h/h F vs. p/h F	397.2	-272.3 to 1067	No	ns	0.5468	E-F
										Number of treatments (columns)	8						h/h F vs. s/h F	-2595	-3265 to -1926	Yes	****	<0.0001	E-G
										Number of values (total)	40						h/h F vs. s/p F	-2089	-2759 to -1420	Yes	****	<0.0001	E-H
																	p/h F vs. s/h F	-2992	-3662 to -2323	Yes	****	<0.0001	F-G
																	p/h F vs. s/p F	-2486	-3156 to -1817	Yes	****	<0.0001	F-H
																	s/h F vs. s/p F	506	-163.4 to 1175	No	ns	0.2536	G-H
																	Test details	Mean 1	Mean 2	Mean Diff.	SE of diff.	n1	n2	q	DF
																	h/h M vs. p/h M	1670	1143	527.3	206.7	5	5	3.608	32
																	h/h M vs. s/h M	1670	4277	-2607	206.7	5	5	17.84	32
																	h/h M vs. s/p M	1670	3792	-2122	206.7	5	5	14.52	32
																	h/h M vs. h/h F	1670	1479	191.2	206.7	5	5	1.308	32
																	h/h M vs. p/h F	1670	1082	588.3	206.7	5	5	4.026	32
																	h/h M vs. s/h F	1670	4074	-2404	206.7	5	5	16.45	32
																	h/h M vs. s/p F	1670	3568	-1898	206.7	5	5	12.99	32
																	p/h M vs. s/h M	1143	4277	-3134	206.7	5	5	21.45	32
																	p/h M vs. s/p M	1143	3792	-2650	206.7	5	5	18.13	32
																	p/h M vs. h/h F	1143	1479	-336.1	206.7	5	5	2.3	32
																	p/h M vs. p/h F	1143	1082	61.04	206.7	5	5	0.4177	32
																	p/h M vs. s/h F	1143	4074	-2931	206.7	5	5	20.06	32
																	p/h M vs. s/p F	1143	3568	-2425	206.7	5	5	16.6	32
																	s/h M vs. s/p M	4277	3792	484.3	206.7	5	5	3.314	32
																	s/h M vs. h/h F	4277	1479	2798	206.7	5	5	19.15	32
																	s/h M vs. p/h F	4277	1082	3195	206.7	5	5	21.86	32
																	s/h M vs. s/h F	4277	4074	202.7	206.7	5	5	1.387	32
																	s/h M vs. s/p F	4277	3568	708.8	206.7	5	5	4.85	32
																	s/p M vs. h/h F	3792	1479	2314	206.7	5	5	15.83	32
																	s/p M vs. p/h F	3792	1082	2711	206.7	5	5	18.55	32
																	s/p M vs. s/h F	3792	4074	-281.6	206.7	5	5	1.927	32
																	s/p M vs. s/p F	3792	3568	224.5	206.7	5	5	1.536	32
																	h/h F vs. p/h F	1479	1082	397.2	206.7	5	5	2.718	32
																	h/h F vs. s/h F	1479	4074	-2595	206.7	5	5	17.76	32
																	h/h F vs. s/p F	1479	3568	-2089	206.7	5	5	14.3	32
																	p/h F vs. s/h F	1082	4074	-2992	206.7	5	5	20.48	32
																	p/h F vs. s/p F	1082	3568	-2486	206.7	5	5	17.01	32
																	s/h F vs. s/p F	4074	3568	506	206.7	5	5	3.463	32

## Sheet: FIG8C
	h/h M	p/h M	s/h M	s/p M	h/h F	p/h F	s/h F	s/p F		Ordinary one-way ANOVA							Tukey's multiple comparisons test
Fig. 8C	91.2936	78.5033	255.193	201.295	85.4016	84.65	194.574	246.299		Table Analyzed	Fig. 8C-Ab42+p26						Number of families	1
Ab42+p26	104.546	93.4514	175.668	199.865	87.6357	75.3326	207.432	221.24		Data sets analyzed	A-H						Number of comparisons per family	28
	121.358	93.4514	197.95	208.834	74.5289	102.515	197.95	172.585									Alpha	0.05
	77.7171	89.1084	217.604	218.06	88.3737	96.9904	178.216	174.13		ANOVA summary
	78.5033	73.7206	207.9	208.367	83.8948	72.9075	271.291	192.631		F	42.82						Tukey's multiple comparisons test	Mean Diff.	95.00% CI of diff.	Significant?	Summary	Adjusted P Value
										P value	<0.0001						h/h M vs. p/h M	9.037	-35.84 to 53.91	No	ns	0.9977	A-B
										P value summary	****						h/h M vs. s/h M	-116.2	-161.1 to -71.30	Yes	****	<0.0001	A-C
										Significant diff. among means (P < 0.05)?	Yes						h/h M vs. s/p M	-112.6	-157.5 to -67.73	Yes	****	<0.0001	A-D
										R square	0.9035						h/h M vs. h/h F	10.72	-34.16 to 55.59	No	ns	0.9934	A-E
																	h/h M vs. p/h F	8.205	-36.67 to 53.08	No	ns	0.9987	A-F
										Brown-Forsythe test							h/h M vs. s/h F	-115.2	-160.1 to -70.33	Yes	****	<0.0001	A-G
										F (DFn, DFd)	1.312 (7, 32)						h/h M vs. s/p F	-106.7	-151.6 to -61.82	Yes	****	<0.0001	A-H
										P value	0.2766						p/h M vs. s/h M	-125.2	-170.1 to -80.34	Yes	****	<0.0001	B-C
										P value summary	ns						p/h M vs. s/p M	-121.6	-166.5 to -76.76	Yes	****	<0.0001	B-D
										Are SDs significantly different (P < 0.05)?	No						p/h M vs. h/h F	1.68	-43.19 to 46.55	No	ns	>0.9999	B-E
																	p/h M vs. p/h F	-0.832	-45.71 to 44.04	No	ns	>0.9999	B-F
										Bartlett's test							p/h M vs. s/h F	-124.2	-169.1 to -79.37	Yes	****	<0.0001	B-G
										Bartlett's statistic (corrected)	21.13						p/h M vs. s/p F	-115.7	-160.6 to -70.86	Yes	****	<0.0001	B-H
										P value	0.0036						s/h M vs. s/p M	3.579	-41.30 to 48.45	No	ns	>0.9999	C-D
										P value summary	**						s/h M vs. h/h F	126.9	82.02 to 171.8	Yes	****	<0.0001	C-E
										Are SDs significantly different (P < 0.05)?	Yes						s/h M vs. p/h F	124.4	79.51 to 169.3	Yes	****	<0.0001	C-F
																	s/h M vs. s/h F	0.9705	-43.90 to 45.85	No	ns	>0.9999	C-G
										ANOVA table	SS	DF	MS	F (DFn, DFd)	P value		s/h M vs. s/p F	9.486	-35.39 to 54.36	No	ns	0.9969	C-H
										Treatment (between columns)	143800	7	20543	F (7, 32) = 42.82	P<0.0001		s/p M vs. h/h F	123.3	78.44 to 168.2	Yes	****	<0.0001	D-E
										Residual (within columns)	15353	32	479.8				s/p M vs. p/h F	120.8	75.93 to 165.7	Yes	****	<0.0001	D-F
										Total	159153	39					s/p M vs. s/h F	-2.608	-47.48 to 42.27	No	ns	>0.9999	D-G
																	s/p M vs. s/p F	5.907	-38.97 to 50.78	No	ns	0.9999	D-H
										Model comparison	SS	DF	Probability it is correct				h/h F vs. p/h F	-2.512	-47.39 to 42.36	No	ns	>0.9999	E-F
										Null H. All population means identical	159153	39	0%				h/h F vs. s/h F	-125.9	-170.8 to -81.05	Yes	****	<0.0001	E-G
										Alternative H: Distinct population means	15353	32	100%				h/h F vs. s/p F	-117.4	-162.3 to -72.54	Yes	****	<0.0001	E-H
										Ratio of probabilities			0				p/h F vs. s/h F	-123.4	-168.3 to -78.54	Yes	****	<0.0001	F-G
										Difference in AICc			73.87				p/h F vs. s/p F	-114.9	-159.8 to -70.02	Yes	****	<0.0001	F-H
																	s/h F vs. s/p F	8.515	-36.36 to 53.39	No	ns	0.9984	G-H
										Data summary
										Number of treatments (columns)	8						Test details	Mean 1	Mean 2	Mean Diff.	SE of diff.	n1	n2	q	DF
										Number of values (total)	40						h/h M vs. p/h M	94.68	85.65	9.037	13.85	5	5	0.9225	32
																	h/h M vs. s/h M	94.68	210.9	-116.2	13.85	5	5	11.86	32
																	h/h M vs. s/p M	94.68	207.3	-112.6	13.85	5	5	11.49	32
																	h/h M vs. h/h F	94.68	83.97	10.72	13.85	5	5	1.094	32
																	h/h M vs. p/h F	94.68	86.48	8.205	13.85	5	5	0.8376	32
																	h/h M vs. s/h F	94.68	209.9	-115.2	13.85	5	5	11.76	32
																	h/h M vs. s/p F	94.68	201.4	-106.7	13.85	5	5	10.89	32
																	p/h M vs. s/h M	85.65	210.9	-125.2	13.85	5	5	12.78	32
																	p/h M vs. s/p M	85.65	207.3	-121.6	13.85	5	5	12.42	32
																	p/h M vs. h/h F	85.65	83.97	1.68	13.85	5	5	0.1715	32
																	p/h M vs. p/h F	85.65	86.48	-0.832	13.85	5	5	0.08494	32
																	p/h M vs. s/h F	85.65	209.9	-124.2	13.85	5	5	12.68	32
																	p/h M vs. s/p F	85.65	201.4	-115.7	13.85	5	5	11.81	32
																	s/h M vs. s/p M	210.9	207.3	3.579	13.85	5	5	0.3653	32
																	s/h M vs. h/h F	210.9	83.97	126.9	13.85	5	5	12.95	32
																	s/h M vs. p/h F	210.9	86.48	124.4	13.85	5	5	12.7	32
																	s/h M vs. s/h F	210.9	209.9	0.9705	13.85	5	5	0.09908	32
																	s/h M vs. s/p F	210.9	201.4	9.486	13.85	5	5	0.9684	32
																	s/p M vs. h/h F	207.3	83.97	123.3	13.85	5	5	12.59	32
																	s/p M vs. p/h F	207.3	86.48	120.8	13.85	5	5	12.33	32
																	s/p M vs. s/h F	207.3	209.9	-2.608	13.85	5	5	0.2662	32
																	s/p M vs. s/p F	207.3	201.4	5.907	13.85	5	5	0.6031	32
																	h/h F vs. p/h F	83.97	86.48	-2.512	13.85	5	5	0.2565	32
																	h/h F vs. s/h F	83.97	209.9	-125.9	13.85	5	5	12.86	32
																	h/h F vs. s/p F	83.97	201.4	-117.4	13.85	5	5	11.99	32
																	p/h F vs. s/h F	86.48	209.9	-123.4	13.85	5	5	12.6	32
																	p/h F vs. s/p F	86.48	201.4	-114.9	13.85	5	5	11.73	32
																	s/h F vs. s/p F	209.9	201.4	8.515	13.85	5	5	0.8693	32
	h/h M	p/h M	s/h M	s/p M	h/h F	p/h F	s/h F	s/p F		Ordinary one-way ANOVA							Tukey's multiple comparisons test
Fig. 8C	37.8625	42.9851	143.609	132.595	36.9077	33.0055	137.35	149.782		Table Analyzed	Fig. 8C-Ab42						Number of families	1
Ab42	53.1236	44.348	103.123	122.918	42.9851	28.9497	114.998	130.999		Data sets analyzed	A-H						Number of comparisons per family	28
	52.2679	45.2492	128.108	115.665	39.7495	39.2805	126.17	93.3002									Alpha	0.05
	41.1461	38.337	143.609	99.9995	44.348	35.4606	105.189	101.739		ANOVA summary
	42.0688	38.8096	131.319	106.217	46.1447	32.0072	146.397	109.282		F	57.57						Tukey's multiple comparisons test	Mean Diff.	95.00% CI of diff.	Significant?	Summary	Adjusted P Value
										P value	<0.0001						h/h M vs. p/h M	3.348	-23.13 to 29.82	No	ns	0.9999	A-B
										P value summary	****						h/h M vs. s/h M	-84.66	-111.1 to -58.18	Yes	****	<0.0001	A-C
										Significant diff. among means (P < 0.05)?	Yes						h/h M vs. s/p M	-70.19	-96.66 to -43.71	Yes	****	<0.0001	A-D
										R square	0.9264						h/h M vs. h/h F	3.267	-23.21 to 29.74	No	ns	>0.9999	A-E
																	h/h M vs. p/h F	11.55	-14.92 to 38.03	No	ns	0.8444	A-F
										Brown-Forsythe test							h/h M vs. s/h F	-80.73	-107.2 to -54.25	Yes	****	<0.0001	A-G
										F (DFn, DFd)	2.332 (7, 32)						h/h M vs. s/p F	-71.73	-98.20 to -45.25	Yes	****	<0.0001	A-H
										P value	0.0483						p/h M vs. s/h M	-88.01	-114.5 to -61.53	Yes	****	<0.0001	B-C
										P value summary	*						p/h M vs. s/p M	-73.53	-100.0 to -47.06	Yes	****	<0.0001	B-D
										Are SDs significantly different (P < 0.05)?	Yes						p/h M vs. h/h F	-0.08121	-26.56 to 26.39	No	ns	>0.9999	B-E
																	p/h M vs. p/h F	8.205	-18.27 to 34.68	No	ns	0.9705	B-F
										Bartlett's test							p/h M vs. s/h F	-84.08	-110.5 to -57.60	Yes	****	<0.0001	B-G
										Bartlett's statistic (corrected)	24.84						p/h M vs. s/p F	-75.07	-101.5 to -48.60	Yes	****	<0.0001	B-H
										P value	0.0008						s/h M vs. s/p M	14.47	-12.00 to 40.95	No	ns	0.6429	C-D
										P value summary	***						s/h M vs. h/h F	87.93	61.45 to 114.4	Yes	****	<0.0001	C-E
										Are SDs significantly different (P < 0.05)?	Yes						s/h M vs. p/h F	96.21	69.74 to 122.7	Yes	****	<0.0001	C-F
																	s/h M vs. s/h F	3.933	-22.54 to 30.41	No	ns	0.9997	C-G
										ANOVA table	SS	DF	MS	F (DFn, DFd)	P value		s/h M vs. s/p F	12.93	-13.54 to 39.41	No	ns	0.7568	C-H
										Treatment (between columns)	67303	7	9615	F (7, 32) = 57.57	P<0.0001		s/p M vs. h/h F	73.45	46.98 to 99.93	Yes	****	<0.0001	D-E
										Residual (within columns)	5344	32	167				s/p M vs. p/h F	81.74	55.26 to 108.2	Yes	****	<0.0001	D-F
										Total	72647	39					s/p M vs. s/h F	-10.54	-37.02 to 15.93	No	ns	0.896	D-G
																	s/p M vs. s/p F	-1.541	-28.02 to 24.93	No	ns	>0.9999	D-H
										Data summary							h/h F vs. p/h F	8.286	-18.19 to 34.76	No	ns	0.9689	E-F
										Number of treatments (columns)	8						h/h F vs. s/h F	-83.99	-110.5 to -57.52	Yes	****	<0.0001	E-G
										Number of values (total)	40						h/h F vs. s/p F	-74.99	-101.5 to -48.52	Yes	****	<0.0001	E-H
																	p/h F vs. s/h F	-92.28	-118.8 to -65.81	Yes	****	<0.0001	F-G
																	p/h F vs. s/p F	-83.28	-109.8 to -56.80	Yes	****	<0.0001	F-H
																	s/h F vs. s/p F	9.001	-17.47 to 35.48	No	ns	0.9519	G-H
																	Test details	Mean 1	Mean 2	Mean Diff.	SE of diff.	n1	n2	q	DF
																	h/h M vs. p/h M	45.29	41.95	3.348	8.173	5	5	0.5793	32
																	h/h M vs. s/h M	45.29	130	-84.66	8.173	5	5	14.65	32
																	h/h M vs. s/p M	45.29	115.5	-70.19	8.173	5	5	12.14	32
																	h/h M vs. h/h F	45.29	42.03	3.267	8.173	5	5	0.5653	32
																	h/h M vs. p/h F	45.29	33.74	11.55	8.173	5	5	1.999	32
																	h/h M vs. s/h F	45.29	126	-80.73	8.173	5	5	13.97	32
																	h/h M vs. s/p F	45.29	117	-71.73	8.173	5	5	12.41	32
																	p/h M vs. s/h M	41.95	130	-88.01	8.173	5	5	15.23	32
																	p/h M vs. s/p M	41.95	115.5	-73.53	8.173	5	5	12.72	32
																	p/h M vs. h/h F	41.95	42.03	-0.08121	8.173	5	5	0.01405	32
																	p/h M vs. p/h F	41.95	33.74	8.205	8.173	5	5	1.42	32
																	p/h M vs. s/h F	41.95	126	-84.08	8.173	5	5	14.55	32
																	p/h M vs. s/p F	41.95	117	-75.07	8.173	5	5	12.99	32
																	s/h M vs. s/p M	130	115.5	14.47	8.173	5	5	2.505	32
																	s/h M vs. h/h F	130	42.03	87.93	8.173	5	5	15.21	32
																	s/h M vs. p/h F	130	33.74	96.21	8.173	5	5	16.65	32
																	s/h M vs. s/h F	130	126	3.933	8.173	5	5	0.6805	32
																	s/h M vs. s/p F	130	117	12.93	8.173	5	5	2.238	32
																	s/p M vs. h/h F	115.5	42.03	73.45	8.173	5	5	12.71	32
																	s/p M vs. p/h F	115.5	33.74	81.74	8.173	5	5	14.14	32
																	s/p M vs. s/h F	115.5	126	-10.54	8.173	5	5	1.824	32
																	s/p M vs. s/p F	115.5	117	-1.541	8.173	5	5	0.2667	32
																	h/h F vs. p/h F	42.03	33.74	8.286	8.173	5	5	1.434	32
																	h/h F vs. s/h F	42.03	126	-83.99	8.173	5	5	14.53	32
																	h/h F vs. s/p F	42.03	117	-74.99	8.173	5	5	12.98	32
																	p/h F vs. s/h F	33.74	126	-92.28	8.173	5	5	15.97	32
																	p/h F vs. s/p F	33.74	117	-83.28	8.173	5	5	14.41	32
																	s/h F vs. s/p F	126	117	9.001	8.173	5	5	1.557	32

## Sheet: FIG8D
	h/h M	p/h M	s/h M	s/p M	h/h F	p/h F	s/h F	s/p F		Ordinary one-way ANOVA							Tukey's multiple comparisons test
Fig. 8D	0.044244	0.0611174	0.0497154	0.0394555	0.057742	0.0567309	0.0426373	0.0526981		Table Analyzed	Fig. 8D-Ab42/Ab40-4G8						Number of families	1
Ab42+p26/Ab40+p24	0.057297	0.0643406	0.0395641	0.0426966	0.0582228	0.0593541	0.0393024	0.0502995		Data sets analyzed	A-H						Number of comparisons per family	28
	0.0539463	0.0555196	0.0412809	0.051488	0.041187	0.0694305	0.0432436	0.0488455									Alpha	0.05
	0.0463078	0.0517167	0.0439382	0.0490548	0.039221	0.0799665	0.0361715	0.0462195		ANOVA summary
	0.0512878	0.0487041	0.0438327	0.056032	0.0570255	0.0715324	0.0529222	0.0503976		F	6.875						Tukey's multiple comparisons test	Mean Diff.	95.00% CI of diff.	Significant?	Summary
										P value	<0.0001						h/h M vs. p/h M	-0.005663	-0.01935 to 0.008023	No	ns		A-B
										P value summary	****						h/h M vs. s/h M	0.00695	-0.006735 to 0.02064	No	ns		A-C
										Significant diff. among means (P < 0.05)?	Yes						h/h M vs. s/p M	0.002871	-0.01081 to 0.01656	No	ns		A-D
										R square	0.6006						h/h M vs. h/h F	-6.309e-05	-0.01375 to 0.01362	No	ns		A-E
																	h/h M vs. p/h F	-0.01679	-0.03047 to -0.003101	Yes	**		A-F
										Brown-Forsythe test							h/h M vs. s/h F	0.007761	-0.005925 to 0.02145	No	ns		A-G
										F (DFn, DFd)	0.8733 (7, 32)						h/h M vs. s/p F	0.0009245	-0.01276 to 0.01461	No	ns		A-H
										P value	0.5379						p/h M vs. s/h M	0.01261	-0.001072 to 0.02630	No	ns		B-C
										P value summary	ns						p/h M vs. s/p M	0.008534	-0.005151 to 0.02222	No	ns		B-D
										Are SDs significantly different (P < 0.05)?	No						p/h M vs. h/h F	0.0056	-0.008086 to 0.01929	No	ns		B-E
																	p/h M vs. p/h F	-0.01112	-0.02481 to 0.002562	No	ns		B-F
										Bartlett's test							p/h M vs. s/h F	0.01342	-0.0002614 to 0.02711	No	ns		B-G
										Bartlett's statistic (corrected)	8.65						p/h M vs. s/p F	0.006588	-0.007098 to 0.02027	No	ns		B-H
										P value	0.2788						s/h M vs. s/p M	-0.004079	-0.01776 to 0.009607	No	ns		C-D
										P value summary	ns						s/h M vs. h/h F	-0.007013	-0.02070 to 0.006672	No	ns		C-E
										Are SDs significantly different (P < 0.05)?	No						s/h M vs. p/h F	-0.02374	-0.03742 to -0.01005	Yes	****		C-F
																	s/h M vs. s/h F	0.0008109	-0.01287 to 0.01450	No	ns		C-G
										ANOVA table	SS	DF	MS	F (DFn, DFd)	P value		s/h M vs. s/p F	-0.006026	-0.01971 to 0.007660	No	ns		C-H
										Treatment (between columns)	0.002147	7	0.0003068	F (7, 32) = 6.875	P<0.0001		s/p M vs. h/h F	-0.002934	-0.01662 to 0.01075	No	ns		D-E
										Residual (within columns)	0.001428	32	4.462e-05				s/p M vs. p/h F	-0.01966	-0.03334 to -0.005972	Yes	**		D-F
										Total	0.003575	39					s/p M vs. s/h F	0.00489	-0.008796 to 0.01858	No	ns		D-G
																	s/p M vs. s/p F	-0.001947	-0.01563 to 0.01174	No	ns		D-H
										Model comparison	SS	DF	Probability it is correct				h/h F vs. p/h F	-0.01672	-0.03041 to -0.003038	Yes	**		E-F
										Null H. All population means identical	0.003575	39	0.01997%				h/h F vs. s/h F	0.007824	-0.005861 to 0.02151	No	ns		E-G
										Alternative H: Distinct population means	0.001428	32	99.98%				h/h F vs. s/p F	0.0009876	-0.01270 to 0.01467	No	ns		E-H
										Ratio of probabilities			5007				p/h F vs. s/h F	0.02455	0.01086 to 0.03823	Yes	****		F-G
										Difference in AICc			17.04				p/h F vs. s/p F	0.01771	0.004025 to 0.03140	Yes	**		F-H
																	s/h F vs. s/p F	-0.006837	-0.02052 to 0.006849	No	ns		G-H
										Data summary
										Number of treatments (columns)	8						Test details	Mean 1	Mean 2	Mean Diff.	SE of diff.	n1	n2	q	DF
										Number of values (total)	40						h/h M vs. p/h M	0.05062	0.05628	-0.005663	0.004225	5	5	1.896	32
																	h/h M vs. s/h M	0.05062	0.04367	0.00695	0.004225	5	5	2.327	32
																	h/h M vs. s/p M	0.05062	0.04775	0.002871	0.004225	5	5	0.9611	32
																	h/h M vs. h/h F	0.05062	0.05068	-6.309e-05	0.004225	5	5	0.02112	32
																	h/h M vs. p/h F	0.05062	0.0674	-0.01679	0.004225	5	5	5.619	32
																	h/h M vs. s/h F	0.05062	0.04286	0.007761	0.004225	5	5	2.598	32
																	h/h M vs. s/p F	0.05062	0.04969	0.0009245	0.004225	5	5	0.3095	32
																	p/h M vs. s/h M	0.05628	0.04367	0.01261	0.004225	5	5	4.222	32
																	p/h M vs. s/p M	0.05628	0.04775	0.008534	0.004225	5	5	2.857	32
																	p/h M vs. h/h F	0.05628	0.05068	0.0056	0.004225	5	5	1.875	32
																	p/h M vs. p/h F	0.05628	0.0674	-0.01112	0.004225	5	5	3.723	32
																	p/h M vs. s/h F	0.05628	0.04286	0.01342	0.004225	5	5	4.494	32
																	p/h M vs. s/p F	0.05628	0.04969	0.006588	0.004225	5	5	2.205	32
																	s/h M vs. s/p M	0.04367	0.04775	-0.004079	0.004225	5	5	1.365	32
																	s/h M vs. h/h F	0.04367	0.05068	-0.007013	0.004225	5	5	2.348	32
																	s/h M vs. p/h F	0.04367	0.0674	-0.02374	0.004225	5	5	7.945	32
																	s/h M vs. s/h F	0.04367	0.04286	0.0008109	0.004225	5	5	0.2714	32
																	s/h M vs. s/p F	0.04367	0.04969	-0.006026	0.004225	5	5	2.017	32
																	s/p M vs. h/h F	0.04775	0.05068	-0.002934	0.004225	5	5	0.9822	32
																	s/p M vs. p/h F	0.04775	0.0674	-0.01966	0.004225	5	5	6.58	32
																	s/p M vs. s/h F	0.04775	0.04286	0.00489	0.004225	5	5	1.637	32
																	s/p M vs. s/p F	0.04775	0.04969	-0.001947	0.004225	5	5	0.6516	32
																	h/h F vs. p/h F	0.05068	0.0674	-0.01672	0.004225	5	5	5.598	32
																	h/h F vs. s/h F	0.05068	0.04286	0.007824	0.004225	5	5	2.619	32
																	h/h F vs. s/p F	0.05068	0.04969	0.0009876	0.004225	5	5	0.3306	32
																	p/h F vs. s/h F	0.0674	0.04286	0.02455	0.004225	5	5	8.217	32
																	p/h F vs. s/p F	0.0674	0.04969	0.01771	0.004225	5	5	5.928	32
																	s/h F vs. s/p F	0.04286	0.04969	-0.006837	0.004225	5	5	2.288	32
	h/h M	p/h M	s/h M	s/p M	h/h F	p/h F	s/h F	s/p F		Ordinary one-way ANOVA							Tukey's multiple comparisons test
Fig. 8D	0.0209757	0.0397839	0.0371428	0.0293562	0.0290573	0.0272645	0.0327582	0.0352137		Table Analyzed	Fig. 8D-Ab42/Ab40-6E10
Ab42/Ab40	0.0335844	0.0342274	0.0249814	0.0303126	0.0309953	0.0275161	0.0260015	0.0351411		Data sets analyzed	A-H
	0.0279809	0.0331582	0.029592	0.0340791	0.024911	0.0317058	0.0314977	0.0312005
	0.0248889	0.0541658	0.0300684	0.0269753	0.0237411	0.0359784	0.0288126	0.0309258		ANOVA summary
	0.0291756	0.0306838	0.0306546	0.0322924	0.0362345	0.0347518	0.0357259	0.0305402		F	2.152
										P value	0.0661
										P value summary	ns
										Significant diff. among means (P < 0.05)?	No
										R square	0.3201
										Brown-Forsythe test
										F (DFn, DFd)	0.6526 (7, 32)
										P value	0.7095
										P value summary	ns
										Are SDs significantly different (P < 0.05)?	No
										Bartlett's test
										Bartlett's statistic (corrected)	10.19
										P value	0.1781
										P value summary	ns
										Are SDs significantly different (P < 0.05)?	No
										ANOVA table	SS	DF	MS	F (DFn, DFd)	P value
										Treatment (between columns)	0.000373	7	5.329e-05	F (7, 32) = 2.152	P=0.0661
										Residual (within columns)	0.0007924	32	2.476e-05
										Total	0.001165	39
										Data summary
										Number of treatments (columns)	8
										Number of values (total)	40

## Sheet: FIG8E
	h/h M	p/h M	s/h M	s/p M	h/h F	p/h F	s/h F	s/p F		Ordinary one-way ANOVA							Tukey's multiple comparisons test
Fig. 8E	8.72099	5.16471	3.05493	4.75662	5.82995	6.18393	3.10508	3.29561		Table Analyzed	Fig. 8E-sAPPa (by sex)						Number of families	1
sAPPa	6.84774	4.72746	4.23295	3.75373	3.49939	4.66453	4.63188	3.70551		Data sets analyzed	A-H						Number of comparisons per family	28
	6.13695	5.78461	3.42656	3.06962	5.03309	5.42061	4.12141	4.44068									Alpha	0.05
	6.52263	5.77813	3.10264	4.13179	5.25064	4.1387	4.25473	3.11484		ANOVA summary
	2.97261	5.22423	3.57074	2.84885	3.96401	4.18588	3.21458	4.59128		F	4.657						Tukey's multiple comparisons test	Mean Diff.	95.00% CI of diff.	Significant?	Summary	Adjusted P Value
										P value	0.0011						h/h M vs. p/h M	0.9044	-1.136 to 2.945	No	ns	0.8339	A-B
										P value summary	**						h/h M vs. s/h M	2.763	0.7224 to 4.803	Yes	**	0.0026	A-C
										Significant diff. among means (P < 0.05)?	Yes						h/h M vs. s/p M	2.528	0.4879 to 4.568	Yes	**	0.0072	A-D
										R square	0.5046						h/h M vs. h/h F	1.525	-0.5154 to 3.565	No	ns	0.2659	A-E
																	h/h M vs. p/h F	1.321	-0.7187 to 3.362	No	ns	0.4374	A-F
										Brown-Forsythe test							h/h M vs. s/h F	2.375	0.3344 to 4.415	Yes	*	0.0136	A-G
										F (DFn, DFd)	1.006 (7, 32)						h/h M vs. s/p F	2.411	0.3704 to 4.451	Yes	*	0.0117	A-H
										P value	0.4451						p/h M vs. s/h M	1.858	-0.1819 to 3.898	No	ns	0.0954	B-C
										P value summary	ns						p/h M vs. s/p M	1.624	-0.4165 to 3.664	No	ns	0.201	B-D
										Are SDs significantly different (P < 0.05)?	No						p/h M vs. h/h F	0.6204	-1.420 to 2.661	No	ns	0.9734	B-E
																	p/h M vs. p/h F	0.4171	-1.623 to 2.457	No	ns	0.9975	B-F
										Bartlett's test							p/h M vs. s/h F	1.47	-0.5699 to 3.510	No	ns	0.307	B-G
										Bartlett's statistic (corrected)	14.71						p/h M vs. s/p F	1.506	-0.5340 to 3.546	No	ns	0.2794	B-H
										P value	0.0398						s/h M vs. s/p M	-0.2346	-2.275 to 1.806	No	ns	>0.9999	C-D
										P value summary	*						s/h M vs. h/h F	-1.238	-3.278 to 0.8023	No	ns	0.5192	C-E
										Are SDs significantly different (P < 0.05)?	Yes						s/h M vs. p/h F	-1.441	-3.481 to 0.5990	No	ns	0.3306	C-F
																	s/h M vs. s/h F	-0.388	-2.428 to 1.652	No	ns	0.9984	C-G
										ANOVA table	SS	DF	MS	F (DFn, DFd)	P value		s/h M vs. s/p F	-0.352	-2.392 to 1.688	No	ns	0.9991	C-H
										Treatment (between columns)	32.33	7	4.618	F (7, 32) = 4.657	P=0.0011		s/p M vs. h/h F	-1.003	-3.043 to 1.037	No	ns	0.7508	D-E
										Residual (within columns)	31.73	32	0.9917				s/p M vs. p/h F	-1.207	-3.247 to 0.8336	No	ns	0.5507	D-F
										Total	64.06	39					s/p M vs. s/h F	-0.1534	-2.194 to 1.887	No	ns	>0.9999	D-G
																	s/p M vs. s/p F	-0.1175	-2.158 to 1.923	No	ns	>0.9999	D-H
										Data summary							h/h F vs. p/h F	-0.2033	-2.244 to 1.837	No	ns	>0.9999	E-F
										Number of treatments (columns)	8						h/h F vs. s/h F	0.8499	-1.190 to 2.890	No	ns	0.8726	E-G
										Number of values (total)	40						h/h F vs. s/p F	0.8858	-1.154 to 2.926	No	ns	0.8476	E-H
																	p/h F vs. s/h F	1.053	-0.9870 to 3.093	No	ns	0.7041	F-G
																	p/h F vs. s/p F	1.089	-0.9511 to 3.129	No	ns	0.6691	F-H
																	s/h F vs. s/p F	0.03595	-2.004 to 2.076	No	ns	>0.9999	G-H
																	Test details	Mean 1	Mean 2	Mean Diff.	SE of diff.	n1	n2	q	DF
																	h/h M vs. p/h M	6.24	5.336	0.9044	0.6298	5	5	2.031	32
																	h/h M vs. s/h M	6.24	3.478	2.763	0.6298	5	5	6.203	32
																	h/h M vs. s/p M	6.24	3.712	2.528	0.6298	5	5	5.676	32
																	h/h M vs. h/h F	6.24	4.715	1.525	0.6298	5	5	3.424	32
																	h/h M vs. p/h F	6.24	4.919	1.321	0.6298	5	5	2.967	32
																	h/h M vs. s/h F	6.24	3.866	2.375	0.6298	5	5	5.332	32
																	h/h M vs. s/p F	6.24	3.83	2.411	0.6298	5	5	5.413	32
																	p/h M vs. s/h M	5.336	3.478	1.858	0.6298	5	5	4.173	32
																	p/h M vs. s/p M	5.336	3.712	1.624	0.6298	5	5	3.646	32
																	p/h M vs. h/h F	5.336	4.715	0.6204	0.6298	5	5	1.393	32
																	p/h M vs. p/h F	5.336	4.919	0.4171	0.6298	5	5	0.9366	32
																	p/h M vs. s/h F	5.336	3.866	1.47	0.6298	5	5	3.301	32
																	p/h M vs. s/p F	5.336	3.83	1.506	0.6298	5	5	3.382	32
																	s/h M vs. s/p M	3.478	3.712	-0.2346	0.6298	5	5	0.5267	32
																	s/h M vs. h/h F	3.478	4.715	-1.238	0.6298	5	5	2.779	32
																	s/h M vs. p/h F	3.478	4.919	-1.441	0.6298	5	5	3.236	32
																	s/h M vs. s/h F	3.478	3.866	-0.388	0.6298	5	5	0.8712	32
																	s/h M vs. s/p F	3.478	3.83	-0.352	0.6298	5	5	0.7904	32
																	s/p M vs. h/h F	3.712	4.715	-1.003	0.6298	5	5	2.253	32
																	s/p M vs. p/h F	3.712	4.919	-1.207	0.6298	5	5	2.709	32
																	s/p M vs. s/h F	3.712	3.866	-0.1534	0.6298	5	5	0.3445	32
																	s/p M vs. s/p F	3.712	3.83	-0.1175	0.6298	5	5	0.2637	32
																	h/h F vs. p/h F	4.715	4.919	-0.2033	0.6298	5	5	0.4565	32
																	h/h F vs. s/h F	4.715	3.866	0.8499	0.6298	5	5	1.908	32
																	h/h F vs. s/p F	4.715	3.83	0.8858	0.6298	5	5	1.989	32
																	p/h F vs. s/h F	4.919	3.866	1.053	0.6298	5	5	2.365	32
																	p/h F vs. s/p F	4.919	3.83	1.089	0.6298	5	5	2.446	32
																	s/h F vs. s/p F	3.866	3.83	0.03595	0.6298	5	5	0.08073	32

## Sheet: FIG8F
	h/h M	p/h M	s/h M	s/p M	h/h F	p/h F	s/h F	s/p F		Ordinary one-way ANOVA							Tukey's multiple comparisons test
Fig. 8F	0.282871	0.189665	0.084025	0.062781	0.269435	0.225218	0.078066	0.061145		Table Analyzed	Fig. 8F-sAPPb-wt (by sex)						Number of families	1
sAPPbWT	0.218824	0.240301	0.096757	0.057392	0.194402	0.168674	0.108695	0.060443		Data sets analyzed	A-H						Number of comparisons per family	28
	0.241785	0.204281	0.094946	0.049594	0.270486	0.191604	0.098792	0.059974									Alpha	0.05
	0.268804	0.239665	0.080591	0.049831	0.230962	0.135391	0.1069	0.045541		ANOVA summary
	0.188587	0.207495	0.087448	0.036867	0.18103	0.164106	0.074383	0.060208		F	48.53						Tukey's multiple comparisons test	Mean Diff.	95.00% CI of diff.	Significant?	Summary	Adjusted P Value
										P value	<0.0001						h/h M vs. p/h M	0.02389	-0.02856 to 0.07634	No	ns	0.8143	A-B
										P value summary	****						h/h M vs. s/h M	0.1514	0.09897 to 0.2039	Yes	****	<0.0001	A-C
										Significant diff. among means (P < 0.05)?	Yes						h/h M vs. s/p M	0.1889	0.1364 to 0.2413	Yes	****	<0.0001	A-D
										R square	0.9139						h/h M vs. h/h F	0.01091	-0.04154 to 0.06336	No	ns	0.9972	A-E
																	h/h M vs. p/h F	0.06318	0.01072 to 0.1156	Yes	**	0.0097	A-F
										Brown-Forsythe test							h/h M vs. s/h F	0.1468	0.09436 to 0.1993	Yes	****	<0.0001	A-G
										F (DFn, DFd)	2.911 (7, 32)						h/h M vs. s/p F	0.1827	0.1303 to 0.2352	Yes	****	<0.0001	A-H
										P value	0.0179						p/h M vs. s/h M	0.1275	0.07508 to 0.1800	Yes	****	<0.0001	B-C
										P value summary	*						p/h M vs. s/p M	0.165	0.1125 to 0.2174	Yes	****	<0.0001	B-D
										Are SDs significantly different (P < 0.05)?	Yes						p/h M vs. h/h F	-0.01298	-0.06543 to 0.03947	No	ns	0.9918	B-E
																	p/h M vs. p/h F	0.03928	-0.01317 to 0.09173	No	ns	0.2636	B-F
										Bartlett's test							p/h M vs. s/h F	0.1229	0.07046 to 0.1754	Yes	****	<0.0001	B-G
										Bartlett's statistic (corrected)	22.3						p/h M vs. s/p F	0.1588	0.1064 to 0.2113	Yes	****	<0.0001	B-H
										P value	0.0023						s/h M vs. s/p M	0.03746	-0.01499 to 0.08991	No	ns	0.3176	C-D
										P value summary	**						s/h M vs. h/h F	-0.1405	-0.1930 to -0.08806	Yes	****	<0.0001	C-E
										Are SDs significantly different (P < 0.05)?	Yes						s/h M vs. p/h F	-0.08825	-0.1407 to -0.03579	Yes	***	0.0001	C-F
																	s/h M vs. s/h F	-0.004614	-0.05706 to 0.04784	No	ns	>0.9999	C-G
										ANOVA table	SS	DF	MS	F (DFn, DFd)	P value		s/h M vs. s/p F	0.03129	-0.02116 to 0.08374	No	ns	0.5401	C-H
										Treatment (between columns)	0.2227	7	0.03181	F (7, 32) = 48.53	P<0.0001		s/p M vs. h/h F	-0.178	-0.2304 to -0.1255	Yes	****	<0.0001	D-E
										Residual (within columns)	0.02097	32	0.0006555				s/p M vs. p/h F	-0.1257	-0.1782 to -0.07325	Yes	****	<0.0001	D-F
										Total	0.2436	39					s/p M vs. s/h F	-0.04207	-0.09452 to 0.01038	No	ns	0.1935	D-G
																	s/p M vs. s/p F	-0.006169	-0.05862 to 0.04628	No	ns	>0.9999	D-H
										Data summary							h/h F vs. p/h F	0.05226	-0.0001863 to 0.1047	No	ns	0.0514	E-F
										Number of treatments (columns)	8						h/h F vs. s/h F	0.1359	0.08345 to 0.1883	Yes	****	<0.0001	E-G
										Number of values (total)	40						h/h F vs. s/p F	0.1718	0.1194 to 0.2243	Yes	****	<0.0001	E-H
																	p/h F vs. s/h F	0.08363	0.03118 to 0.1361	Yes	***	0.0003	F-G
																	p/h F vs. s/p F	0.1195	0.06709 to 0.1720	Yes	****	<0.0001	F-H
																	s/h F vs. s/p F	0.03591	-0.01655 to 0.08836	No	ns	0.3685	G-H
																	Test details	Mean 1	Mean 2	Mean Diff.	SE of diff.	n1	n2	q	DF
																	h/h M vs. p/h M	0.2402	0.2163	0.02389	0.01619	5	5	2.087	32
																	h/h M vs. s/h M	0.2402	0.08875	0.1514	0.01619	5	5	13.23	32
																	h/h M vs. s/p M	0.2402	0.05129	0.1889	0.01619	5	5	16.5	32
																	h/h M vs. h/h F	0.2402	0.2293	0.01091	0.01619	5	5	0.953	32
																	h/h M vs. p/h F	0.2402	0.177	0.06318	0.01619	5	5	5.518	32
																	h/h M vs. s/h F	0.2402	0.09337	0.1468	0.01619	5	5	12.82	32
																	h/h M vs. s/p F	0.2402	0.05746	0.1827	0.01619	5	5	15.96	32
																	p/h M vs. s/h M	0.2163	0.08875	0.1275	0.01619	5	5	11.14	32
																	p/h M vs. s/p M	0.2163	0.05129	0.165	0.01619	5	5	14.41	32
																	p/h M vs. h/h F	0.2163	0.2293	-0.01298	0.01619	5	5	1.134	32
																	p/h M vs. p/h F	0.2163	0.177	0.03928	0.01619	5	5	3.431	32
																	p/h M vs. s/h F	0.2163	0.09337	0.1229	0.01619	5	5	10.74	32
																	p/h M vs. s/p F	0.2163	0.05746	0.1588	0.01619	5	5	13.87	32
																	s/h M vs. s/p M	0.08875	0.05129	0.03746	0.01619	5	5	3.272	32
																	s/h M vs. h/h F	0.08875	0.2293	-0.1405	0.01619	5	5	12.27	32
																	s/h M vs. p/h F	0.08875	0.177	-0.08825	0.01619	5	5	7.707	32
																	s/h M vs. s/h F	0.08875	0.09337	-0.004614	0.01619	5	5	0.403	32
																	s/h M vs. s/p F	0.08875	0.05746	0.03129	0.01619	5	5	2.733	32
																	s/p M vs. h/h F	0.05129	0.2293	-0.178	0.01619	5	5	15.54	32
																	s/p M vs. p/h F	0.05129	0.177	-0.1257	0.01619	5	5	10.98	32
																	s/p M vs. s/h F	0.05129	0.09337	-0.04207	0.01619	5	5	3.675	32
																	s/p M vs. s/p F	0.05129	0.05746	-0.006169	0.01619	5	5	0.5388	32
																	h/h F vs. p/h F	0.2293	0.177	0.05226	0.01619	5	5	4.565	32
																	h/h F vs. s/h F	0.2293	0.09337	0.1359	0.01619	5	5	11.87	32
																	h/h F vs. s/p F	0.2293	0.05746	0.1718	0.01619	5	5	15.01	32
																	p/h F vs. s/h F	0.177	0.09337	0.08363	0.01619	5	5	7.304	32
																	p/h F vs. s/p F	0.177	0.05746	0.1195	0.01619	5	5	10.44	32
																	s/h F vs. s/p F	0.09337	0.05746	0.03591	0.01619	5	5	3.136	32
	h/h M	p/h M	s/h M	s/p M	h/h F	p/h F	s/h F	s/p F		Ordinary one-way ANOVA							Tukey's multiple comparisons test
Fig. 8F	0.000452	0	1.23237	1.63826	0.000148	0	1.18315	1.66876		Table Analyzed	Fig. 8F-sAPPb-SW (by sex)						Number of families	1
sAPPbSW	0	0	1.58989	1.45789	0.0003	0	1.37733	1.54878		Data sets analyzed	A-H						Number of comparisons per family	28
	0.000148	0	1.66845	1.18767	0	0	0.875349	1.53121									Alpha	0.05
	0.0003	0	1.54689	1.43394	0.000604	0	1.10104	1.27445		ANOVA summary
	0.001061	0	1.43926	1.4122	0.000604	0	0.587194	1.55568		F	132.5						Tukey's multiple comparisons test	Mean Diff.	95.00% CI of diff.	Significant?	Summary	Adjusted P Value
										P value	<0.0001						h/h M vs. p/h M	0.0003922	-0.2962 to 0.2970	No	ns	>0.9999	A-B
										P value summary	****						h/h M vs. s/h M	-1.495	-1.792 to -1.198	Yes	****	<0.0001	A-C
										Significant diff. among means (P < 0.05)?	Yes						h/h M vs. s/p M	-1.426	-1.722 to -1.129	Yes	****	<0.0001	A-D
										R square	0.9667						h/h M vs. h/h F	6.1e-05	-0.2965 to 0.2966	No	ns	>0.9999	A-E
																	h/h M vs. p/h F	0.0003922	-0.2962 to 0.2970	No	ns	>0.9999	A-F
										Brown-Forsythe test							h/h M vs. s/h F	-1.024	-1.321 to -0.7279	Yes	****	<0.0001	A-G
										F (DFn, DFd)	3.171 (7, 32)						h/h M vs. s/p F	-1.515	-1.812 to -1.219	Yes	****	<0.0001	A-H
										P value	0.0116						p/h M vs. s/h M	-1.495	-1.792 to -1.199	Yes	****	<0.0001	B-C
										P value summary	*						p/h M vs. s/p M	-1.426	-1.723 to -1.129	Yes	****	<0.0001	B-D
										Are SDs significantly different (P < 0.05)?	Yes						p/h M vs. h/h F	-0.0003312	-0.2969 to 0.2962	No	ns	>0.9999	B-E
																	p/h M vs. p/h F	0	-0.2966 to 0.2966	No	ns	>0.9999	B-F
										Bartlett's test							p/h M vs. s/h F	-1.025	-1.321 to -0.7282	Yes	****	<0.0001	B-G
										Bartlett's statistic (corrected)							p/h M vs. s/p F	-1.516	-1.812 to -1.219	Yes	****	<0.0001	B-H
										P value							s/h M vs. s/p M	0.06938	-0.2272 to 0.3659	No	ns	0.9942	C-D
										P value summary							s/h M vs. h/h F	1.495	1.198 to 1.792	Yes	****	<0.0001	C-E
										Are SDs significantly different (P < 0.05)?							s/h M vs. p/h F	1.495	1.199 to 1.792	Yes	****	<0.0001	C-F
																	s/h M vs. s/h F	0.4706	0.1740 to 0.7671	Yes	***	0.0003	C-G
										ANOVA table	SS	DF	MS	F (DFn, DFd)	P value		s/h M vs. s/p F	-0.0204	-0.3170 to 0.2762	No	ns	>0.9999	C-H
										Treatment (between columns)	19.44	7	2.777	F (7, 32) = 132.5	P<0.0001		s/p M vs. h/h F	1.426	1.129 to 1.722	Yes	****	<0.0001	D-E
										Residual (within columns)	0.6706	32	0.02095				s/p M vs. p/h F	1.426	1.129 to 1.723	Yes	****	<0.0001	D-F
										Total	20.11	39					s/p M vs. s/h F	0.4012	0.1046 to 0.6977	Yes	**	0.0027	D-G
																	s/p M vs. s/p F	-0.08978	-0.3864 to 0.2068	No	ns	0.974	D-H
										Data summary							h/h F vs. p/h F	0.0003312	-0.2962 to 0.2969	No	ns	>0.9999	E-F
										Number of treatments (columns)	8						h/h F vs. s/h F	-1.024	-1.321 to -0.7279	Yes	****	<0.0001	E-G
										Number of values (total)	40						h/h F vs. s/p F	-1.515	-1.812 to -1.219	Yes	****	<0.0001	E-H
																	p/h F vs. s/h F	-1.025	-1.321 to -0.7282	Yes	****	<0.0001	F-G
																	p/h F vs. s/p F	-1.516	-1.812 to -1.219	Yes	****	<0.0001	F-H
																	s/h F vs. s/p F	-0.491	-0.7875 to -0.1944	Yes	***	0.0002	G-H
																	Test details	Mean 1	Mean 2	Mean Diff.	SE of diff.	n1	n2	q	DF
																	h/h M vs. p/h M	0.0003922	0	0.0003922	0.09155	5	5	0.006058	32
																	h/h M vs. s/h M	0.0003922	1.495	-1.495	0.09155	5	5	23.09	32
																	h/h M vs. s/p M	0.0003922	1.426	-1.426	0.09155	5	5	22.02	32
																	h/h M vs. h/h F	0.0003922	0.0003312	6.1e-05	0.09155	5	5	0.0009423	32
																	h/h M vs. p/h F	0.0003922	0	0.0003922	0.09155	5	5	0.006058	32
																	h/h M vs. s/h F	0.0003922	1.025	-1.024	0.09155	5	5	15.82	32
																	h/h M vs. s/p F	0.0003922	1.516	-1.515	0.09155	5	5	23.41	32
																	p/h M vs. s/h M	0	1.495	-1.495	0.09155	5	5	23.1	32
																	p/h M vs. s/p M	0	1.426	-1.426	0.09155	5	5	22.03	32
																	p/h M vs. h/h F	0	0.0003312	-0.0003312	0.09155	5	5	0.005116	32
																	p/h M vs. p/h F	0	0	0	0.09155	5	5	0	32
																	p/h M vs. s/h F	0	1.025	-1.025	0.09155	5	5	15.83	32
																	p/h M vs. s/p F	0	1.516	-1.516	0.09155	5	5	23.41	32
																	s/h M vs. s/p M	1.495	1.426	0.06938	0.09155	5	5	1.072	32
																	s/h M vs. h/h F	1.495	0.0003312	1.495	0.09155	5	5	23.09	32
																	s/h M vs. p/h F	1.495	0	1.495	0.09155	5	5	23.1	32
																	s/h M vs. s/h F	1.495	1.025	0.4706	0.09155	5	5	7.269	32
																	s/h M vs. s/p F	1.495	1.516	-0.0204	0.09155	5	5	0.3152	32
																	s/p M vs. h/h F	1.426	0.0003312	1.426	0.09155	5	5	22.02	32
																	s/p M vs. p/h F	1.426	0	1.426	0.09155	5	5	22.03	32
																	s/p M vs. s/h F	1.426	1.025	0.4012	0.09155	5	5	6.197	32
																	s/p M vs. s/p F	1.426	1.516	-0.08978	0.09155	5	5	1.387	32
																	h/h F vs. p/h F	0.0003312	0	0.0003312	0.09155	5	5	0.005116	32
																	h/h F vs. s/h F	0.0003312	1.025	-1.024	0.09155	5	5	15.83	32
																	h/h F vs. s/p F	0.0003312	1.516	-1.515	0.09155	5	5	23.41	32
																	p/h F vs. s/h F	0	1.025	-1.025	0.09155	5	5	15.83	32
																	p/h F vs. s/p F	0	1.516	-1.516	0.09155	5	5	23.41	32
																	s/h F vs. s/p F	1.025	1.516	-0.491	0.09155	5	5	7.584	32
	h/h M	p/h M	s/h M	s/p M	h/h F	p/h F	s/h F	s/p F		Ordinary one-way ANOVA							Tukey's multiple comparisons test
Fig. 8F	0.283323	0.189665	1.31639	1.70104	0.269583	0.225218	1.26122	1.72991		Table Analyzed	Fig. 7F-sAPPb WT+Sw (by sex)						Number of families	1
sAPPbSW+sAPPbWT	0.218824	0.240301	1.68664	1.51528	0.194702	0.168674	1.48603	1.60922		Data sets analyzed	A-H						Number of comparisons per family	28
	0.241933	0.204281	1.76339	1.23726	0.270486	0.191604	0.974141	1.59119									Alpha	0.05
	0.269104	0.239665	1.62748	1.48377	0.231566	0.135391	1.20794	1.31999		ANOVA summary
	0.189648	0.207495	1.52671	1.44907	0.181634	0.164106	0.661577	1.61589		F	97.64						Tukey's multiple comparisons test	Mean Diff.	95.00% CI of diff.	Significant?	Summary	Adjusted P Value
										P value	<0.0001						h/h M vs. p/h M	0.02429	-0.2859 to 0.3345	No	ns	>0.9999	A-B
										P value summary	****						h/h M vs. s/h M	-1.344	-1.654 to -1.033	Yes	****	<0.0001	A-C
										Significant diff. among means (P < 0.05)?	Yes						h/h M vs. s/p M	-1.237	-1.547 to -0.9265	Yes	****	<0.0001	A-D
										R square	0.9553						h/h M vs. h/h F	0.01097	-0.2992 to 0.3212	No	ns	>0.9999	A-E
																	h/h M vs. p/h F	0.06357	-0.2466 to 0.3738	No	ns	0.9974	A-F
										Brown-Forsythe test							h/h M vs. s/h F	-0.8776	-1.188 to -0.5674	Yes	****	<0.0001	A-G
										F (DFn, DFd)	2.188 (7, 32)						h/h M vs. s/p F	-1.333	-1.643 to -1.022	Yes	****	<0.0001	A-H
										P value	0.0621						p/h M vs. s/h M	-1.368	-1.678 to -1.058	Yes	****	<0.0001	B-C
										P value summary	ns						p/h M vs. s/p M	-1.261	-1.571 to -0.9508	Yes	****	<0.0001	B-D
										Are SDs significantly different (P < 0.05)?	No						p/h M vs. h/h F	-0.01331	-0.3235 to 0.2969	No	ns	>0.9999	B-E
																	p/h M vs. p/h F	0.03928	-0.2709 to 0.3495	No	ns	0.9999	B-F
										Bartlett's test							p/h M vs. s/h F	-0.9019	-1.212 to -0.5917	Yes	****	<0.0001	B-G
										Bartlett's statistic (corrected)	37.62						p/h M vs. s/p F	-1.357	-1.667 to -1.047	Yes	****	<0.0001	B-H
										P value	<0.0001						s/h M vs. s/p M	0.1068	-0.2034 to 0.4171	No	ns	0.9486	C-D
										P value summary	****						s/h M vs. h/h F	1.355	1.044 to 1.665	Yes	****	<0.0001	C-E
										Are SDs significantly different (P < 0.05)?	Yes						s/h M vs. p/h F	1.407	1.097 to 1.717	Yes	****	<0.0001	C-F
																	s/h M vs. s/h F	0.4659	0.1557 to 0.7762	Yes	***	0.0007	C-G
										ANOVA table	SS	DF	MS	F (DFn, DFd)	P value		s/h M vs. s/p F	0.01089	-0.2993 to 0.3211	No	ns	>0.9999	C-H
										Treatment (between columns)	15.67	7	2.239	F (7, 32) = 97.64	P<0.0001		s/p M vs. h/h F	1.248	0.9375 to 1.558	Yes	****	<0.0001	D-E
										Residual (within columns)	0.7337	32	0.02293				s/p M vs. p/h F	1.3	0.9901 to 1.611	Yes	****	<0.0001	D-F
										Total	16.4	39					s/p M vs. s/h F	0.3591	0.04889 to 0.6693	Yes	*	0.0143	D-G
																	s/p M vs. s/p F	-0.09595	-0.4062 to 0.2143	No	ns	0.9708	D-H
										Data summary							h/h F vs. p/h F	0.0526	-0.2576 to 0.3628	No	ns	0.9992	E-F
										Number of treatments (columns)	8						h/h F vs. s/h F	-0.8886	-1.199 to -0.5784	Yes	****	<0.0001	E-G
										Number of values (total)	40						h/h F vs. s/p F	-1.344	-1.654 to -1.033	Yes	****	<0.0001	E-H
																	p/h F vs. s/h F	-0.9412	-1.251 to -0.6310	Yes	****	<0.0001	F-G
																	p/h F vs. s/p F	-1.396	-1.706 to -1.086	Yes	****	<0.0001	F-H
																	s/h F vs. s/p F	-0.4551	-0.7653 to -0.1448	Yes	***	0.001	G-H
																	Test details	Mean 1	Mean 2	Mean Diff.	SE of diff.	n1	n2	q	DF
																	h/h M vs. p/h M	0.2406	0.2163	0.02429	0.09577	5	5	0.3586	32
																	h/h M vs. s/h M	0.2406	1.584	-1.344	0.09577	5	5	19.84	32
																	h/h M vs. s/p M	0.2406	1.477	-1.237	0.09577	5	5	18.26	32
																	h/h M vs. h/h F	0.2406	0.2296	0.01097	0.09577	5	5	0.162	32
																	h/h M vs. p/h F	0.2406	0.177	0.06357	0.09577	5	5	0.9387	32
																	h/h M vs. s/h F	0.2406	1.118	-0.8776	0.09577	5	5	12.96	32
																	h/h M vs. s/p F	0.2406	1.573	-1.333	0.09577	5	5	19.68	32
																	p/h M vs. s/h M	0.2163	1.584	-1.368	0.09577	5	5	20.2	32
																	p/h M vs. s/p M	0.2163	1.477	-1.261	0.09577	5	5	18.62	32
																	p/h M vs. h/h F	0.2163	0.2296	-0.01331	0.09577	5	5	0.1966	32
																	p/h M vs. p/h F	0.2163	0.177	0.03928	0.09577	5	5	0.5801	32
																	p/h M vs. s/h F	0.2163	1.118	-0.9019	0.09577	5	5	13.32	32
																	p/h M vs. s/p F	0.2163	1.573	-1.357	0.09577	5	5	20.04	32
																	s/h M vs. s/p M	1.584	1.477	0.1068	0.09577	5	5	1.578	32
																	s/h M vs. h/h F	1.584	0.2296	1.355	0.09577	5	5	20	32
																	s/h M vs. p/h F	1.584	0.177	1.407	0.09577	5	5	20.78	32
																	s/h M vs. s/h F	1.584	1.118	0.4659	0.09577	5	5	6.881	32
																	s/h M vs. s/p F	1.584	1.573	0.01089	0.09577	5	5	0.1608	32
																	s/p M vs. h/h F	1.477	0.2296	1.248	0.09577	5	5	18.42	32
																	s/p M vs. p/h F	1.477	0.177	1.3	0.09577	5	5	19.2	32
																	s/p M vs. s/h F	1.477	1.118	0.3591	0.09577	5	5	5.303	32
																	s/p M vs. s/p F	1.477	1.573	-0.09595	0.09577	5	5	1.417	32
																	h/h F vs. p/h F	0.2296	0.177	0.0526	0.09577	5	5	0.7767	32
																	h/h F vs. s/h F	0.2296	1.118	-0.8886	0.09577	5	5	13.12	32
																	h/h F vs. s/p F	0.2296	1.573	-1.344	0.09577	5	5	19.84	32
																	p/h F vs. s/h F	0.177	1.118	-0.9412	0.09577	5	5	13.9	32
																	p/h F vs. s/p F	0.177	1.573	-1.396	0.09577	5	5	20.62	32
																	s/h F vs. s/p F	1.118	1.573	-0.4551	0.09577	5	5	6.72	32
