# Supplementary material for: Opposite changes in APP processing and human Aβ levels in rats carrying either a protective or a pathogenic APP mutation
Source: eLife. 2020 Feb 5;9:e52612. doi: 10.7554/eLife.52612 (PMC7018507; doi:10.7554/eLife.52612)
Supplement: Figure 9—source data 1. [file elife-52612-fig9-data1.xlsx]

## Sheet: FIG9A
	h/h	p/h	s/h	real s/p	hyp. s/p			Ordinary one-way ANOVA							Tukey's multiple comparisons test
Fig. 9A	1805.06	1080.46	3866.41	4516.78	3372.46			Table Analyzed	Fig. 9A-Ab40 hyp-real s/p						Number of families	1
Ab40	1581.79	1295.69	4128	4055.02	3849.28			Data sets analyzed	A-E						Number of comparisons per family	10
	1867.99	1364.65	4329.15	3394.01	4119.39										Alpha	0.05
	1653.19	707.771	4776.08	3707.07	3909.44			ANOVA summary
	1441.92	1264.83	4283.81	3289.22	3974.23			F	187.6						Tukey's multiple comparisons test	Mean Diff.	95.00% CI of diff.	Significant?	Summary	Adjusted P Value
	1270.17	1210.57	4192.85	4253.52	3829.01			P value	<0.0001						h/h vs. p/h	462.2	51.61 to 872.9	Yes	*	0.0203	A-B
	1386.83	1052.1	4422.75	3727.79	3900.44			P value summary	****						h/h vs. s/h	-2601	-3012 to -2190	Yes	****	<0.0001	A-C
	1595.66	1238.91	4005.69	2990.34	3670.19			Significant diff. among means (P < 0.05)?	Yes						h/h vs. real s/p	-2106	-2516 to -1695	Yes	****	<0.0001	A-D
	1867.99	985.608	3650.79	3289.76	3061.99			R square	0.9434						h/h vs. hyp. s/p	-2139	-2549 to -1728	Yes	****	<0.0001	A-E
	1273.5	921.023	4097.79	3578.29	3444.41										p/h vs. s/h	-3063	-3474 to -2653	Yes	****	<0.0001	B-C
								Brown-Forsythe test							p/h vs. real s/p	-2568	-2979 to -2157	Yes	****	<0.0001	B-D
								F (DFn, DFd)	1.640 (4, 45)						p/h vs. hyp. s/p	-2601	-3012 to -2190	Yes	****	<0.0001	B-E
								P value	0.1808						s/h vs. real s/p	495.2	84.51 to 905.8	Yes	*	0.011	C-D
								P value summary	ns						s/h vs. hyp. s/p	462.2	51.61 to 872.9	Yes	*	0.0203	C-E
								Are SDs significantly different (P < 0.05)?	No						real s/p vs. hyp. s/p	-32.9	-443.5 to 377.7	No	ns	0.9994	D-E
								Bartlett's test							Test details	Mean 1	Mean 2	Mean Diff.	SE of diff.	n1	n2	q	DF
								Bartlett's statistic (corrected)	7.995						h/h vs. p/h	1574	1112	462.2	144.5	10	10	4.523	45
								P value	0.0918						h/h vs. s/h	1574	4175	-2601	144.5	10	10	25.45	45
								P value summary	ns						h/h vs. real s/p	1574	3680	-2106	144.5	10	10	20.61	45
								Are SDs significantly different (P < 0.05)?	No						h/h vs. hyp. s/p	1574	3713	-2139	144.5	10	10	20.93	45
															p/h vs. s/h	1112	4175	-3063	144.5	10	10	29.98	45
								ANOVA table	SS	DF	MS	F (DFn, DFd)	P value		p/h vs. real s/p	1112	3680	-2568	144.5	10	10	25.13	45
								Treatment (between columns)	78378281	4	19594570	F (4, 45) = 187.6	P<0.0001		p/h vs. hyp. s/p	1112	3713	-2601	144.5	10	10	25.45	45
								Residual (within columns)	4699219	45	104427				s/h vs. real s/p	4175	3680	495.2	144.5	10	10	4.845	45
								Total	83077499	49					s/h vs. hyp. s/p	4175	3713	462.2	144.5	10	10	4.523	45
															real s/p vs. hyp. s/p	3680	3713	-32.9	144.5	10	10	0.322	45
								Data summary
								Number of treatments (columns)	5
								Number of values (total)	50

## Sheet: FIG9B
	h/h	p/h	s/h	real s/p	hyp. s/p			Ordinary one-way ANOVA							Tukey's multiple comparisons test
Fig. 9B	37.8625	42.9851	143.609	132.595	142.934			Table Analyzed	Fig. 9B-Ab42 hyp-real s/p						Number of families	1
Ab42	53.1236	44.348	103.123	122.918	103.811			Data sets analyzed	A-E						Number of comparisons per family	10
	52.2679	45.2492	128.108	115.665	129.697										Alpha	0.05
	41.1461	38.337	143.609	99.9995	138.286			ANOVA summary
	42.0688	38.8096	131.319	106.217	126.468			F	113.3						Tukey's multiple comparisons test	Mean Diff.	95.00% CI of diff.	Significant?	Summary	Adjusted P Value
	36.9077	33.0055	137.35	149.782	126.695			P value	<0.0001						h/h vs. p/h	5.817	-11.10 to 22.74	No	ns	0.8642	A-B
	42.9851	28.9497	114.998	130.999	100.287			P value summary	****						h/h vs. s/h	-84.33	-101.2 to -67.41	Yes	****	<0.0001	A-C
	39.7495	39.2805	126.17	93.3002	121.79			Significant diff. among means (P < 0.05)?	Yes						h/h vs. real s/p	-72.59	-89.51 to -55.67	Yes	****	<0.0001	A-D
	44.348	35.4606	105.189	101.739	96.9888			R square	0.9097						h/h vs. hyp. s/p	-78.51	-95.43 to -61.59	Yes	****	<0.0001	A-E
	46.1447	32.0072	146.397	109.282	134.744										p/h vs. s/h	-90.14	-107.1 to -73.22	Yes	****	<0.0001	B-C
								Brown-Forsythe test							p/h vs. real s/p	-78.41	-95.33 to -61.49	Yes	****	<0.0001	B-D
								F (DFn, DFd)	3.608 (4, 45)						p/h vs. hyp. s/p	-84.33	-101.2 to -67.41	Yes	****	<0.0001	B-E
								P value	0.0124						s/h vs. real s/p	11.74	-5.182 to 28.66	No	ns	0.2964	C-D
								P value summary	*						s/h vs. hyp. s/p	5.817	-11.10 to 22.74	No	ns	0.8642	C-E
								Are SDs significantly different (P < 0.05)?	Yes						real s/p vs. hyp. s/p	-5.92	-22.84 to 11.00	No	ns	0.8565	D-E
								Bartlett's test							Test details	Mean 1	Mean 2	Mean Diff.	SE of diff.	n1	n2	q	DF
								Bartlett's statistic (corrected)	19.25						h/h vs. p/h	43.66	37.84	5.817	5.955	10	10	1.382	45
								P value	0.0007						h/h vs. s/h	43.66	128	-84.33	5.955	10	10	20.03	45
								P value summary	***						h/h vs. real s/p	43.66	116.2	-72.59	5.955	10	10	17.24	45
								Are SDs significantly different (P < 0.05)?	Yes						h/h vs. hyp. s/p	43.66	122.2	-78.51	5.955	10	10	18.65	45
															p/h vs. s/h	37.84	128	-90.14	5.955	10	10	21.41	45
								ANOVA table	SS	DF	MS	F (DFn, DFd)	P value		p/h vs. real s/p	37.84	116.2	-78.41	5.955	10	10	18.62	45
								Treatment (between columns)	80338	4	20084	F (4, 45) = 113.3	P<0.0001		p/h vs. hyp. s/p	37.84	122.2	-84.33	5.955	10	10	20.03	45
								Residual (within columns)	7978	45	177.3				s/h vs. real s/p	128	116.2	11.74	5.955	10	10	2.788	45
								Total	88316	49					s/h vs. hyp. s/p	128	122.2	5.817	5.955	10	10	1.382	45
															real s/p vs. hyp. s/p	116.2	122.2	-5.92	5.955	10	10	1.406	45
								Data summary
								Number of treatments (columns)	5
								Number of values (total)	50

## Sheet: FIG9C
	h/h	p/h	s/h	real s/p	hyp. s/p			Ordinary one-way ANOVA							Tukey's multiple comparisons test
Fig. 9C	8.72099	5.16471	3.05493	4.75662	2.74184			Table Analyzed	Fig. 9C-sAPPa hyp-real s/p						Number of families	1
sAPPa	6.84774	4.72746	4.23295	3.75373	3.48261			Data sets analyzed	A-E						Number of comparisons per family	10
	6.13695	5.78461	3.42656	3.06962	3.73337										Alpha	0.05
	6.52263	5.77813	3.10264	4.13179	3.40297			ANOVA summary
	2.97261	5.22423	3.57074	2.84885	3.31717			F	9.893						Tukey's multiple comparisons test	Mean Diff.	95.00% CI of diff.	Significant?	Summary
	5.82995	6.18393	3.10508	3.29561	3.8112			P value	<0.0001						h/h vs. p/h	0.3505	-0.8785 to 1.579	No	ns		A-B
	3.49939	4.66453	4.63188	3.70551	3.81861			P value summary	****						h/h vs. s/h	1.806	0.5773 to 3.035	Yes	**		A-C
	5.03309	5.42061	4.12141	4.44068	4.06422			Significant diff. among means (P < 0.05)?	Yes						h/h vs. real s/p	1.707	0.4780 to 2.936	Yes	**		A-D
	5.25064	4.1387	4.25473	3.11484	2.91563			R square	0.4679						h/h vs. hyp. s/p	2.157	0.9278 to 3.386	Yes	****		A-E
	3.96401	4.18588	3.21458	4.59128	1.92266										p/h vs. s/h	1.456	0.2268 to 2.685	Yes	*		B-C
								Brown-Forsythe test							p/h vs. real s/p	1.356	0.1274 to 2.585	Yes	*		B-D
								F (DFn, DFd)	4.320 (4, 45)						p/h vs. hyp. s/p	1.806	0.5773 to 3.035	Yes	**		B-E
								P value	0.0048						s/h vs. real s/p	-0.0993	-1.328 to 1.130	No	ns		C-D
								P value summary	**						s/h vs. hyp. s/p	0.3505	-0.8785 to 1.579	No	ns		C-E
								Are SDs significantly different (P < 0.05)?	Yes						real s/p vs. hyp. s/p	0.4498	-0.7792 to 1.679	No	ns		D-E
								Bartlett's test							Test details	Mean 1	Mean 2	Mean Diff.	SE of diff.	n1	n2	q	DF
								Bartlett's statistic (corrected)	17.48						h/h vs. p/h	5.478	5.127	0.3505	0.4325	10	10	1.146	45
								P value	0.0016						h/h vs. s/h	5.478	3.672	1.806	0.4325	10	10	5.906	45
								P value summary	**						h/h vs. real s/p	5.478	3.771	1.707	0.4325	10	10	5.581	45
								Are SDs significantly different (P < 0.05)?	Yes						h/h vs. hyp. s/p	5.478	3.321	2.157	0.4325	10	10	7.052	45
															p/h vs. s/h	5.127	3.672	1.456	0.4325	10	10	4.76	45
								ANOVA table	SS	DF	MS	F (DFn, DFd)	P value		p/h vs. real s/p	5.127	3.771	1.356	0.4325	10	10	4.435	45
								Treatment (between columns)	37.01	4	9.254	F (4, 45) = 9.893	P<0.0001		p/h vs. hyp. s/p	5.127	3.321	1.806	0.4325	10	10	5.906	45
								Residual (within columns)	42.09	45	0.9354				s/h vs. real s/p	3.672	3.771	-0.0993	0.4325	10	10	0.3247	45
								Total	79.11	49					s/h vs. hyp. s/p	3.672	3.321	0.3505	0.4325	10	10	1.146	45
															real s/p vs. hyp. s/p	3.771	3.321	0.4498	0.4325	10	10	1.471	45
								Model comparison	SS	DF	Probability it is correct
								Null H. All population means identical	79.11	49	0.001801%
								Alternative H: Distinct population means	42.09	45	100%
								Ratio of probabilities			0
								Difference in AICc			21.85
								Data summary
								Number of treatments (columns)	5
								Number of values (total)	50

## Sheet: FIG9D
	h/h	p/h	s/h	real s/p	hyp. s/p			Ordinary one-way ANOVA							Tukey's multiple comparisons test
Fig. 9D	0.283323	0.189665	1.31639	1.70104	1.27098			Table Analyzed	Fig. 9D-sAPPb hyp-real s/p						Number of families	1
sAPPb	0.218824	0.240301	1.68664	1.51528	1.69187			Data sets analyzed	A-E						Number of comparisons per family	10
	0.241933	0.204281	1.76339	1.23726	1.73259										Alpha	0.05
	0.269104	0.239665	1.62748	1.48377	1.63207			ANOVA summary
	0.189648	0.207495	1.52671	1.44907	1.49913			F	76.86						Tukey's multiple comparisons test	Mean Diff.	95.00% CI of diff.	Significant?	Summary
	0.269583	0.225218	1.26122	1.72991	1.25136			P value	<0.0001						h/h vs. p/h	0.03844	-0.2603 to 0.3372	No	ns		A-B
	0.194702	0.168674	1.48603	1.60922	1.41962			P value summary	****						h/h vs. s/h	-1.116	-1.415 to -0.8174	Yes	****		A-C
	0.270486	0.191604	0.974141	1.59119	0.930665			Significant diff. among means (P < 0.05)?	Yes						h/h vs. real s/p	-1.29	-1.589 to -0.9915	Yes	****		A-D
	0.231566	0.135391	1.20794	1.31999	1.10825			R square	0.8723						h/h vs. hyp. s/p	-1.078	-1.376 to -0.7789	Yes	****		A-E
	0.181634	0.164106	0.661577	1.61589	0.590603										p/h vs. s/h	-1.155	-1.453 to -0.8558	Yes	****		B-C
								Brown-Forsythe test							p/h vs. real s/p	-1.329	-1.627 to -1.030	Yes	****		B-D
								F (DFn, DFd)	8.074 (4, 45)						p/h vs. hyp. s/p	-1.116	-1.415 to -0.8174	Yes	****		B-E
								P value	<0.0001						s/h vs. real s/p	-0.1741	-0.4728 to 0.1246	No	ns		C-D
								P value summary	****						s/h vs. hyp. s/p	0.03844	-0.2603 to 0.3372	No	ns		C-E
								Are SDs significantly different (P < 0.05)?	Yes						real s/p vs. hyp. s/p	0.2125	-0.08616 to 0.5113	No	ns		D-E
								Bartlett's test							Test details	Mean 1	Mean 2	Mean Diff.	SE of diff.	n1	n2	q	DF
								Bartlett's statistic (corrected)	57.73						h/h vs. p/h	0.2351	0.1966	0.03844	0.1051	10	10	0.5171	45
								P value	<0.0001						h/h vs. s/h	0.2351	1.351	-1.116	0.1051	10	10	15.01	45
								P value summary	****						h/h vs. real s/p	0.2351	1.525	-1.29	0.1051	10	10	17.36	45
								Are SDs significantly different (P < 0.05)?	Yes						h/h vs. hyp. s/p	0.2351	1.313	-1.078	0.1051	10	10	14.5	45
															p/h vs. s/h	0.1966	1.351	-1.155	0.1051	10	10	15.53	45
								ANOVA table	SS	DF	MS	F (DFn, DFd)	P value		p/h vs. real s/p	0.1966	1.525	-1.329	0.1051	10	10	17.87	45
								Treatment (between columns)	16.99	4	4.247	F (4, 45) = 76.86	P<0.0001		p/h vs. hyp. s/p	0.1966	1.313	-1.116	0.1051	10	10	15.01	45
								Residual (within columns)	2.487	45	0.05526				s/h vs. real s/p	1.351	1.525	-0.1741	0.1051	10	10	2.342	45
								Total	19.47	49					s/h vs. hyp. s/p	1.351	1.313	0.03844	0.1051	10	10	0.5171	45
															real s/p vs. hyp. s/p	1.525	1.313	0.2125	0.1051	10	10	2.859	45
								Model comparison	SS	DF	Probability it is correct
								Null H. All population means identical	19.47	49	0%
								Alternative H: Distinct population means	2.487	45	100%
								Ratio of probabilities			0
								Difference in AICc			93.21
								Data summary
								Number of treatments (columns)	5
								Number of values (total)	50
