# Supplementary material for: Opposite changes in APP processing and human Aβ levels in rats carrying either a protective or a pathogenic APP mutation
Source: eLife. 2020 Feb 5;9:e52612. doi: 10.7554/eLife.52612 (PMC7018507; doi:10.7554/eLife.52612)
Supplement: Figure 10—source data 1. [file elife-52612-fig10-data1.xlsx]

## Sheet: FIG10A
	h/h	p/h	s/h	s/p				Ordinary one-way ANOVA							Tukey's multiple comparisons test
Fig. 10A	0.931805	0.682333	0.782857	0.337996				Table Analyzed	Fig. 10A-total APP M
Total APP male	0.567115	0.678131	0.694896	0.469072				Data sets analyzed	A-D
	0.408636	0.553197	0.82927	0.559776
	0.686981	0.529197	0.857414	0.757981				ANOVA summary
	0.626025	0.528111	0.61067	0.693813				F	1.725
								P value	0.2022
								P value summary	ns
								Significant diff. among means (P < 0.05)?	No
								R square	0.2443
								Brown-Forsythe test
								F (DFn, DFd)	0.7845 (3, 16)
								P value	0.5199
								P value summary	ns
								Are SDs significantly different (P < 0.05)?	No
								Bartlett's test
								Bartlett's statistic (corrected)	3.437
								P value	0.329
								P value summary	ns
								Are SDs significantly different (P < 0.05)?	No
								ANOVA table	SS	DF	MS	F (DFn, DFd)	P value
								Treatment (between columns)	0.1058	3	0.03527	F (3, 16) = 1.725	P=0.2022
								Residual (within columns)	0.3272	16	0.02045
								Total	0.433	19
								Data summary
								Number of treatments (columns)	4
								Number of values (total)	20
	h/h	p/h	s/h	s/p				Ordinary one-way ANOVA							Tukey's multiple comparisons test
Fig. 10A	1.1714	1.65156	1.45532	1.07162				Table Analyzed	Fig. 10A-total APP F						Number of families	1
Total APP female	0.983098	1.5895	1.31523	0.643061				Data sets analyzed	A-D						Number of comparisons per family	6
	1.25446	0.966346	1.36009	0.798124											Alpha	0.05
	1.27097	1.12829	1.11112	0.710857				ANOVA summary
	1.55867	1.086	1.37888	0.765952				F	6.525						Tukey's multiple comparisons test	Mean Diff.	95.00% CI of diff.	Significant?	Summary	Adjusted P Value
								P value	0.0043						h/h vs. p/h	-0.03662	-0.4259 to 0.3526	No	ns	0.9929	A-B
								P value summary	**						h/h vs. s/h	-0.07641	-0.4656 to 0.3128	No	ns	0.942	A-C
								Significant diff. among means (P < 0.05)?	Yes						h/h vs. s/p	0.4498	0.06056 to 0.8390	Yes	*	0.0209	A-D
								R square	0.5502						p/h vs. s/h	-0.03979	-0.4290 to 0.3494	No	ns	0.9909	B-C
															p/h vs. s/p	0.4864	0.09718 to 0.8757	Yes	*	0.0121	B-D
								Brown-Forsythe test							s/h vs. s/p	0.5262	0.1370 to 0.9154	Yes	**	0.0067	C-D
								F (DFn, DFd)	0.9249 (3, 16)
								P value	0.4513						Test details	Mean 1	Mean 2	Mean Diff.	SE of diff.	n1	n2	q	DF
								P value summary	ns						h/h vs. p/h	1.248	1.284	-0.03662	0.136	5	5	0.3807	16
								Are SDs significantly different (P < 0.05)?	No						h/h vs. s/h	1.248	1.324	-0.07641	0.136	5	5	0.7943	16
															h/h vs. s/p	1.248	0.7979	0.4498	0.136	5	5	4.676	16
								Bartlett's test							p/h vs. s/h	1.284	1.324	-0.03979	0.136	5	5	0.4136	16
								Bartlett's statistic (corrected)	3.168						p/h vs. s/p	1.284	0.7979	0.4864	0.136	5	5	5.056	16
								P value	0.3664						s/h vs. s/p	1.324	0.7979	0.5262	0.136	5	5	5.47	16
								P value summary	ns
								Are SDs significantly different (P < 0.05)?	No
								ANOVA table	SS	DF	MS	F (DFn, DFd)	P value
								Treatment (between columns)	0.9057	3	0.3019	F (3, 16) = 6.525	P=0.0043
								Residual (within columns)	0.7404	16	0.04627
								Total	1.646	19
								Data summary
								Number of treatments (columns)	4
								Number of values (total)	20

## Sheet: FIG10B
	h/h	p/h	s/h	s/p				Ordinary one-way ANOVA
Fig. 10B	0.369959	0.280282	0.308015	0.0980592				Table Analyzed	Fig. 10B-imAPP M
imAPP male	0.19787	0.266018	0.219777	0.19487				Data sets analyzed	A-D
	0.131555	0.240266	0.301445	0.213276
	0.207263	0.188881	0.306948	0.275862				ANOVA summary
	0.189663	0.194244	0.184913	0.280478				F	0.5694
								P value	0.6432
								P value summary	ns
								Significant diff. among means (P < 0.05)?	No
								R square	0.09646
								Brown-Forsythe test
								F (DFn, DFd)	0.1626 (3, 16)
								P value	0.92
								P value summary	ns
								Are SDs significantly different (P < 0.05)?	No
								Bartlett's test
								Bartlett's statistic (corrected)	2.205
								P value	0.531
								P value summary	ns
								Are SDs significantly different (P < 0.05)?	No
								ANOVA table	SS	DF	MS	F (DFn, DFd)	P value
								Treatment (between columns)	0.007915	3	0.002638	F (3, 16) = 0.5694	P=0.6432
								Residual (within columns)	0.07414	16	0.004634
								Total	0.08206	19
								Data summary
								Number of treatments (columns)	4
								Number of values (total)	20
	h/h	p/h	s/h	s/p				Ordinary one-way ANOVA							Tukey's multiple comparisons test
Fig. 10B	0.483464	0.610985	0.598898	0.488118				Table Analyzed	Fig. 10B-imAPP F
imAPP female	0.416112	0.599571	0.536639	0.254073				Data sets analyzed	A-D
	0.488409	0.341571	0.413222	0.298283
	0.474548	0.459551	0.349269	0.287508				ANOVA summary
	0.565327	0.38401	0.462135	0.309223				F	3.194
								P value	0.052
								P value summary	ns
								Significant diff. among means (P < 0.05)?	No
								R square	0.3746
								Brown-Forsythe test
								F (DFn, DFd)	1.084 (3, 16)
								P value	0.3841
								P value summary	ns
								Are SDs significantly different (P < 0.05)?	No
								Bartlett's test
								Bartlett's statistic (corrected)	2.299
								P value	0.5127
								P value summary	ns
								Are SDs significantly different (P < 0.05)?	No
								ANOVA table	SS	DF	MS	F (DFn, DFd)	P value
								Treatment (between columns)	0.0865	3	0.02883	F (3, 16) = 3.194	P=0.0520
								Residual (within columns)	0.1444	16	0.009027
								Total	0.2309	19
								Data summary
								Number of treatments (columns)	4
								Number of values (total)	20

## Sheet: FIG10C
	h/h	p/h	s/h	s/p				Ordinary one-way ANOVA							Tukey's multiple comparisons test
Fig. 10C	0.573649	0.414673	0.486945	0.255837				Table Analyzed	Fig. 10C-mAPP M
mAPP male	0.386792	0.429864	0.487528	0.283544				Data sets analyzed	A-D
	0.278475	0.328692	0.514663	0.357228
	0.488016	0.351214	0.551499	0.490295				ANOVA summary
	0.453095	0.341756	0.421929	0.425414				F	2.794
								P value	0.0739
								P value summary	ns
								Significant diff. among means (P < 0.05)?	No
								R square	0.3438
																							DF
								Brown-Forsythe test															11
								F (DFn, DFd)	1.381 (3, 16)														11
								P value	0.2847														11
								P value summary	ns
								Are SDs significantly different (P < 0.05)?	No
								Bartlett's test
								Bartlett's statistic (corrected)	4.333
								P value	0.2277
								P value summary	ns
								Are SDs significantly different (P < 0.05)?	No
								ANOVA table	SS	DF	MS	F (DFn, DFd)	P value
								Treatment (between columns)	0.05475	3	0.01825	F (3, 16) = 2.794	P=0.0739
								Residual (within columns)	0.1045	16	0.006531
								Total	0.1592	19
								Data summary
								Number of treatments (columns)	4
								Number of values (total)	20
	h/h	p/h	s/h	s/p				Ordinary one-way ANOVA							Tukey's multiple comparisons test
Fig. 10C	0.700041	1.07888	0.915439	0.645975				Table Analyzed	Fig. 10C-mAPP F						Number of families	1
mAPP female	0.613421	1.03174	0.832395	0.415425				Data sets analyzed	A-D						Number of comparisons per family	6
	0.794929	0.647403	1.00337	0.529079											Alpha	0.05
	0.843148	0.709484	0.807306	0.440633				ANOVA summary
	1.04942	0.723772	0.957037	0.490548				F	7.551						Tukey's multiple comparisons test	Mean Diff.	95.00% CI of diff.	Significant?	Summary	Adjusted P Value
								P value	0.0023						h/h vs. p/h	-0.03806	-0.2981 to 0.2220	No	ns	0.9745	A-B
								P value summary	**						h/h vs. s/h	-0.1029	-0.3630 to 0.1571	No	ns	0.6757	A-C
								Significant diff. among means (P < 0.05)?	Yes						h/h vs. s/p	0.2959	0.03581 to 0.5559	Yes	*	0.0231	A-D
								R square	0.5861						p/h vs. s/h	-0.06485	-0.3249 to 0.1952	No	ns	0.8903	B-C
															p/h vs. s/p	0.3339	0.07387 to 0.5940	Yes	**	0.0099	B-D
								Brown-Forsythe test							s/h vs. s/p	0.3988	0.1387 to 0.6588	Yes	**	0.0023	C-D
								F (DFn, DFd)	0.8193 (3, 16)
								P value	0.502						Test details	Mean 1	Mean 2	Mean Diff.	SE of diff.	n1	n2	q	DF
								P value summary	ns						h/h vs. p/h	0.8002	0.8383	-0.03806	0.09089	5	5	0.5922	16
								Are SDs significantly different (P < 0.05)?	No						h/h vs. s/h	0.8002	0.9031	-0.1029	0.09089	5	5	1.601	16
															h/h vs. s/p	0.8002	0.5043	0.2959	0.09089	5	5	4.603	16
								Bartlett's test							p/h vs. s/h	0.8383	0.9031	-0.06485	0.09089	5	5	1.009	16
								Bartlett's statistic (corrected)	3.929						p/h vs. s/p	0.8383	0.5043	0.3339	0.09089	5	5	5.196	16
								P value	0.2693						s/h vs. s/p	0.9031	0.5043	0.3988	0.09089	5	5	6.205	16
								P value summary	ns
								Are SDs significantly different (P < 0.05)?	No
								ANOVA table	SS	DF	MS	F (DFn, DFd)	P value
								Treatment (between columns)	0.4679	3	0.156	F (3, 16) = 7.551	P=0.0023
								Residual (within columns)	0.3305	16	0.02065
								Total	0.7984	19
								Data summary
								Number of treatments (columns)	4
								Number of values (total)	20

## Sheet: FIG10D
	h/h	p/h	s/h	s/p				Ordinary one-way ANOVA							Tukey's multiple comparisons test
Fig. 10D	1.55057	1.47949	1.58091	2.609				Table Analyzed	Fig. 10D-mAPP/imAPP M
mAPP/imAPP male	1.95477	1.61592	2.21828	1.45504				Data sets analyzed	A-D
	2.1168	1.36804	1.70732	1.67495
	2.35458	1.85945	1.79672	1.77732				ANOVA summary
	2.38895	1.75942	2.28177	1.51675				F	1.559
								P value	0.2381
								P value summary	ns
								Significant diff. among means (P < 0.05)?	No
								R square	0.2262
								Brown-Forsythe test
								F (DFn, DFd)	0.2544 (3, 16)
								P value	0.8571
								P value summary	ns
								Are SDs significantly different (P < 0.05)?	No
								Bartlett's test
								Bartlett's statistic (corrected)	2.417
								P value	0.4905
								P value summary	ns
								Are SDs significantly different (P < 0.05)?	No
								ANOVA table	SS	DF	MS	F (DFn, DFd)	P value
								Treatment (between columns)	0.5533	3	0.1844	F (3, 16) = 1.559	P=0.2381
								Residual (within columns)	1.893	16	0.1183
								Total	2.446	19
								Data summary
								Number of treatments (columns)	4
								Number of values (total)	20
	h/h	p/h	s/h	s/p				Ordinary one-way ANOVA							Tukey's multiple comparisons test
Fig. 10D	1.44797	1.7658	1.52854	1.3234				Table Analyzed	Fig. 10D-mAPP/imAPP F
mAPP/imAPP female	1.47417	1.72079	1.55113	1.63506				Data sets analyzed	A-D
	1.62759	1.89537	2.42815	1.77375
	1.77674	1.54386	2.31142	1.5326				ANOVA summary
	1.85631	1.88478	2.07091	1.58639				F	2.509
								P value	0.0958
								P value summary	ns
								Significant diff. among means (P < 0.05)?	No
								R square	0.3199
								Brown-Forsythe test
								F (DFn, DFd)	3.055 (3, 16)
								P value	0.0586
								P value summary	ns
								Are SDs significantly different (P < 0.05)?	No
								Bartlett's test
								Bartlett's statistic (corrected)	6.056
								P value	0.1089
								P value summary	ns
								Are SDs significantly different (P < 0.05)?	No
								ANOVA table	SS	DF	MS	F (DFn, DFd)	P value
								Treatment (between columns)	0.4831	3	0.161	F (3, 16) = 2.509	P=0.0958
								Residual (within columns)	1.027	16	0.06419
								Total	1.51	19
								Data summary
								Number of treatments (columns)	4
								Number of values (total)	20

## Sheet: FIG10E
	h/h	p/h	s/h	s/p				Ordinary one-way ANOVA							Tukey's multiple comparisons test
Fig. 10E	0.687612	0.640953	0.317924	0.275321				Table Analyzed	Fig. 10E-bCTF M
bCTF male	0.304222	0.666103	0.282219	0.323494				Data sets analyzed	A-D
	0.24402	0.631398	0.432061	0.409272
	0.465597	0.390077	0.415038	0.406268				ANOVA summary
	0.429646	0.340667	0.346101	0.474466				F	1.93
								P value	0.1654
								P value summary	ns
								Significant diff. among means (P < 0.05)?	No
								R square	0.2657
								Brown-Forsythe test
								F (DFn, DFd)	0.8136 (3, 16)
								P value	0.5049
								P value summary	ns
								Are SDs significantly different (P < 0.05)?	No
								Bartlett's test
								Bartlett's statistic (corrected)	4.692
								P value	0.1958
								P value summary	ns
								Are SDs significantly different (P < 0.05)?	No
								ANOVA table	SS	DF	MS	F (DFn, DFd)	P value
								Treatment (between columns)	0.09238	3	0.03079	F (3, 16) = 1.930	P=0.1654
								Residual (within columns)	0.2553	16	0.01595
								Total	0.3476	19
								Data summary
								Number of treatments (columns)	4
								Number of values (total)	20
	h/h	p/h	s/h	s/p				Ordinary one-way ANOVA							Tukey's multiple comparisons test
Fig. 10E	0.106038	0.542888	0.303107	0.395731				Table Analyzed	Fig. 10E-bCTF F
bCTF female	0.170445	0.59666	0.352054	0.256853				Data sets analyzed	A-D
	0.344521	0.259757	0.337963	0.289562
	0.348528	0.391065	0.249902	0.25324				ANOVA summary
	0.439876	0.314628	0.271463	0.219366				F	1.903
								P value	0.1699
								P value summary	ns
								Significant diff. among means (P < 0.05)?	No
								R square	0.2629
								Brown-Forsythe test
								F (DFn, DFd)	1.588 (3, 16)
								P value	0.2313
								P value summary	ns
								Are SDs significantly different (P < 0.05)?	No
								Bartlett's test
								Bartlett's statistic (corrected)	6.083
								P value	0.1076
								P value summary	ns
								Are SDs significantly different (P < 0.05)?	No
								ANOVA table	SS	DF	MS	F (DFn, DFd)	P value
								Treatment (between columns)	0.0665	3	0.02217	F (3, 16) = 1.903	P=0.1699
								Residual (within columns)	0.1864	16	0.01165
								Total	0.2529	19
								Data summary
								Number of treatments (columns)	4
								Number of values (total)	20

## Sheet: FIG10F
	h/h	p/h	s/h	s/p				Ordinary one-way ANOVA							Tukey's multiple comparisons test
Fig. 10F	1.18678	0.582023	0.715941	0.307937				Table Analyzed	Fig. 10F-aCTF M
aCTF male	0.63071	0.734759	0.630789	0.525846				Data sets analyzed	A-D
	0.581233	0.808352	0.842942	0.539283
	1.01331	0.430148	0.811373	0.700497				ANOVA summary
	0.54321	0.374292	0.589402	0.734551				F	1.481
								P value	0.2573
								P value summary	ns
								Significant diff. among means (P < 0.05)?	No
								R square	0.2174
								Brown-Forsythe test
								F (DFn, DFd)	0.7362 (3, 16)
								P value	0.5456
								P value summary	ns
								Are SDs significantly different (P < 0.05)?	No
								Bartlett's test
								Bartlett's statistic (corrected)	3.315
								P value	0.3456
								P value summary	ns
								Are SDs significantly different (P < 0.05)?	No
								ANOVA table	SS	DF	MS	F (DFn, DFd)	P value
								Treatment (between columns)	0.1782	3	0.05941	F (3, 16) = 1.481	P=0.2573
								Residual (within columns)	0.6417	16	0.0401
								Total	0.8199	19
								Data summary
								Number of treatments (columns)	4
								Number of values (total)	20
	h/h	p/h	s/h	s/p				Ordinary one-way ANOVA							Tukey's multiple comparisons test
Fig. 10F	0.314425	0.698467	0.63433	0.416558				Table Analyzed	Fig. 10F-aCTF F
aCTF female	0.361087	0.705009	0.956091	0.309338				Data sets analyzed	A-D
	0.551871	0.323145	0.691099	0.371862
	0.666293	0.487831	0.468784	0.382122				ANOVA summary
	0.785872	0.294757	0.518018	0.291776				F	2.582
								P value	0.0896
								P value summary	ns
								Significant diff. among means (P < 0.05)?	No
								R square	0.3262
								Brown-Forsythe test
								F (DFn, DFd)	1.792 (3, 16)
								P value	0.1892
								P value summary	ns
								Are SDs significantly different (P < 0.05)?	No
								Bartlett's test
								Bartlett's statistic (corrected)	5.76
								P value	0.1239
								P value summary	ns
								Are SDs significantly different (P < 0.05)?	No
								ANOVA table	SS	DF	MS	F (DFn, DFd)	P value
								Treatment (between columns)	0.228	3	0.076	F (3, 16) = 2.582	P=0.0896
								Residual (within columns)	0.471	16	0.02944
								Total	0.699	19
								Data summary
								Number of treatments (columns)	4
								Number of values (total)	20

## Sheet: Fig10G
	h/h	p/h	s/h	s/p				Ordinary one-way ANOVA							Tukey's multiple comparisons test
Fig. 10G	0.579392	1.10125	0.444064	0.894084				Table Analyzed	Fig. 10G-bCTF/aCTF M						Number of families	1
bCTF/aCTF male	0.482348	0.90656	0.447407	0.615188				Data sets analyzed	A-D						Number of comparisons per family	6
	0.419831	0.781093	0.512563	0.758918											Alpha	0.05
	0.459481	0.906843	0.511526	0.579971				ANOVA summary
	0.790938	0.910164	0.587206	0.645926				F	13.04						Tukey's multiple comparisons test	Mean Diff.	95.00% CI of diff.	Significant?	Summary	Adjusted P Value
								P value	0.0001						h/h vs. p/h	-0.3748	-0.5873 to -0.1623	Yes	***	0.0006	A-B
								P value summary	***						h/h vs. s/h	0.04584	-0.1666 to 0.2583	No	ns	0.925	A-C
								Significant diff. among means (P < 0.05)?	Yes						h/h vs. s/p	-0.1524	-0.3649 to 0.06005	No	ns	0.2106	A-D
								R square	0.7097						p/h vs. s/h	0.4206	0.2082 to 0.6331	Yes	***	0.0002	B-C
															p/h vs. s/p	0.2224	0.009896 to 0.4348	Yes	*	0.0386	B-D
								Brown-Forsythe test							s/h vs. s/p	-0.1983	-0.4107 to 0.01420	No	ns	0.0718	C-D
								F (DFn, DFd)	0.3945 (3, 16)
								P value	0.7587						Test details	Mean 1	Mean 2	Mean Diff.	SE of diff.	n1	n2	q	DF
								P value summary	ns						h/h vs. p/h	0.5464	0.9212	-0.3748	0.07426	5	5	7.137	16
								Are SDs significantly different (P < 0.05)?	No						h/h vs. s/h	0.5464	0.5006	0.04584	0.07426	5	5	0.873	16
															h/h vs. s/p	0.5464	0.6988	-0.1524	0.07426	5	5	2.903	16
								Bartlett's test							p/h vs. s/h	0.9212	0.5006	0.4206	0.07426	5	5	8.01	16
								Bartlett's statistic (corrected)	2.846						p/h vs. s/p	0.9212	0.6988	0.2224	0.07426	5	5	4.235	16
								P value	0.416						s/h vs. s/p	0.5006	0.6988	-0.1983	0.07426	5	5	3.776	16
								P value summary	ns
								Are SDs significantly different (P < 0.05)?	No
								ANOVA table	SS	DF	MS	F (DFn, DFd)	P value
								Treatment (between columns)	0.5393	3	0.1798	F (3, 16) = 13.04	P=0.0001
								Residual (within columns)	0.2206	16	0.01379
								Total	0.76	19
								Data summary
								Number of treatments (columns)	4
								Number of values (total)	20
	h/h	p/h	s/h	s/p				Ordinary one-way ANOVA							Tukey's multiple comparisons test
Fig. 10G	0.337245	0.777256	0.477838	0.950004				Table Analyzed	Fig. 10G-bCTF/aCTF F						Number of families	1
bCTF/aCTF female	0.472033	0.846315	0.368222	0.830332				Data sets analyzed	A-D						Number of comparisons per family	6
	0.624278	0.80384	0.489023	0.778683											Alpha	0.05
	0.523085	0.801639	0.533087	0.662719				ANOVA summary
	0.55973	1.06741	0.524041	0.751829				F	18.58						Tukey's multiple comparisons test	Mean Diff.	95.00% CI of diff.	Significant?	Summary	Adjusted P Value
								P value	<0.0001						h/h vs. p/h	-0.356	-0.5401 to -0.1719	Yes	***	0.0002	A-B
								P value summary	****						h/h vs. s/h	0.02483	-0.1593 to 0.2089	No	ns	0.9798	A-C
								Significant diff. among means (P < 0.05)?	Yes						h/h vs. s/p	-0.2914	-0.4755 to -0.1074	Yes	**	0.0017	A-D
								R square	0.777						p/h vs. s/h	0.3809	0.1968 to 0.5649	Yes	***	0.0001	B-C
															p/h vs. s/p	0.06458	-0.1195 to 0.2487	No	ns	0.7495	B-D
								Brown-Forsythe test							s/h vs. s/p	-0.3163	-0.5004 to -0.1322	Yes	***	0.0008	C-D
								F (DFn, DFd)	0.1857 (3, 16)
								P value	0.9046						Test details	Mean 1	Mean 2	Mean Diff.	SE of diff.	n1	n2	q	DF
								P value summary	ns						h/h vs. p/h	0.5033	0.8593	-0.356	0.06434	5	5	7.825	16
								Are SDs significantly different (P < 0.05)?	No						h/h vs. s/h	0.5033	0.4784	0.02483	0.06434	5	5	0.5458	16
															h/h vs. s/p	0.5033	0.7947	-0.2914	0.06434	5	5	6.406	16
								Bartlett's test							p/h vs. s/h	0.8593	0.4784	0.3809	0.06434	5	5	8.371	16
								Bartlett's statistic (corrected)	1.287						p/h vs. s/p	0.8593	0.7947	0.06458	0.06434	5	5	1.419	16
								P value	0.7323						s/h vs. s/p	0.4784	0.7947	-0.3163	0.06434	5	5	6.951	16
								P value summary	ns
								Are SDs significantly different (P < 0.05)?	No
								ANOVA table	SS	DF	MS	F (DFn, DFd)	P value
								Treatment (between columns)	0.5769	3	0.1923	F (3, 16) = 18.58	P<0.0001
								Residual (within columns)	0.1656	16	0.01035
								Total	0.7425	19
								Data summary
								Number of treatments (columns)	4
								Number of values (total)	20
